# Supplementary material for: Effects of a home-based Radio-Taiso exercise programme on health-related quality of life in older adults with frailty: protocol for an assessor-blind randomised controlled trial
Source: PubMed Central journal article supplement — BMJ Open. 2022 Sep 22;12(9):e063201. doi: 10.1136/bmjopen-2022-063201 (PMC9511584; doi:10.1136/bmjopen-2022-063201), 2022-09-22
Supplement: bmjopen-2022-063201.draft_revisions.pdf [file bmjopen-2022-063201.draft_revisions.pdf]

# BMJ Open

BMJ Open is committed to open peer review. As part of this commitment we make the peer review history of every article we publish publicly available.

When an article is published we post the peer reviewers' comments and the authors' responses online. We also post the versions of the paper that were used during peer review. These are the versions that the peer review comments apply to.

The versions of the paper that follow are the versions that were submitted during the peer review process. They are not the versions of record or the final published versions. They should not be cited or distributed as the published version of this manuscript.

BMJ Open is an open access journal and the full, final, typeset and author-corrected version of record of the manuscript is available on our site with no access controls, subscription charges or pay-per-view fees (<http://bmjopen.bmj.com>).

If you have any questions on BMJ Open's open peer review process please email [info.bmjopen@bmj.com](mailto:info.bmjopen@bmj.com)

# BMJ Open

## Effects of a home-based Radio-Taiso exercise programme on health-related quality of life in older adults with frailty: protocol for an assessor-blind randomized controlled trial

|                               |                                                                                                                                                                                                                                                                                                                                                                                                                                                                                                                                                                                                                                                                                                                                                                                                                                                                                                                                                                                                                                                                                                                                                                                                                                                                                                       |
|-------------------------------|-------------------------------------------------------------------------------------------------------------------------------------------------------------------------------------------------------------------------------------------------------------------------------------------------------------------------------------------------------------------------------------------------------------------------------------------------------------------------------------------------------------------------------------------------------------------------------------------------------------------------------------------------------------------------------------------------------------------------------------------------------------------------------------------------------------------------------------------------------------------------------------------------------------------------------------------------------------------------------------------------------------------------------------------------------------------------------------------------------------------------------------------------------------------------------------------------------------------------------------------------------------------------------------------------------|
| Journal:                      | <i>BMJ Open</i>                                                                                                                                                                                                                                                                                                                                                                                                                                                                                                                                                                                                                                                                                                                                                                                                                                                                                                                                                                                                                                                                                                                                                                                                                                                                                       |
| Manuscript ID                 | bmjopen-2022-063201                                                                                                                                                                                                                                                                                                                                                                                                                                                                                                                                                                                                                                                                                                                                                                                                                                                                                                                                                                                                                                                                                                                                                                                                                                                                                   |
| Article Type:                 | Protocol                                                                                                                                                                                                                                                                                                                                                                                                                                                                                                                                                                                                                                                                                                                                                                                                                                                                                                                                                                                                                                                                                                                                                                                                                                                                                              |
| Date Submitted by the Author: | 24-Mar-2022                                                                                                                                                                                                                                                                                                                                                                                                                                                                                                                                                                                                                                                                                                                                                                                                                                                                                                                                                                                                                                                                                                                                                                                                                                                                                           |
| Complete List of Authors:     | Osuka, Yosuke; Tokyo Metropolitan Institute of Gerontology, Research Team for Promoting Independence and Mental Health<br>Kojima, Narumi; Tokyo Metropolitan Institute of Gerontology, Research Team for Promoting Independence and Mental Health<br>Sugie, Masamitsu; Tokyo Metropolitan Geriatric Hospital and Institute of Gerontology, Department of Cardiology<br>Omura, Takuya; Tokyo Metropolitan Institute of Gerontology, Department of Geriatric Medicine<br>Motokawa, Keiko; Tokyo Metropolitan Institute of Gerontology, Research Team for Promoting Independence and Mental Health<br>Ueda, Takuya; Tokyo Metropolitan Institute of Gerontology, The Tokyo Metropolitan Support Center for Preventative Long-term and Frail Elderly Care<br>Maruo, Kazushi; University of Tsukuba, Department of Biostatistics, Faculty of Medicine<br>Ono, Risa; Japan Radio-Taiso Federation<br>Aoyama, Toshihiko; Japan Radio-Taiso Federation<br>Inoue, Shigeru; Tokyo Medical University, Department of Preventive Medicine and Public Health<br>Kim, Hunkyung; Tokyo Metropolitan Institute of Gerontology, Research Team for Promoting Independence and Mental Health<br>Sasai, Hiroyuki; Tokyo Metropolitan Institute of Gerontology, Research Team for Promoting Independence and Mental Health |
| Keywords:                     | GERIATRIC MEDICINE, MENTAL HEALTH, PUBLIC HEALTH, SPORTS MEDICINE                                                                                                                                                                                                                                                                                                                                                                                                                                                                                                                                                                                                                                                                                                                                                                                                                                                                                                                                                                                                                                                                                                                                                                                                                                     |

SCHOLARONE™  
Manuscripts

1  
2  
3  
4  
5  
6  
7  
8  
9  
10  
11  
12  
13  
14  
15  
16  
17  
18  
19  
20  
21  
22  
23  
24  
25  
26  
27  
28  
29  
30  
31  
32  
33  
34  
35  
36  
37  
38  
39

## Effects of a home-based Radio-Taiso exercise programme on health-related quality of life in older adults with frailty: protocol for an assessor-blind randomized controlled trial

Yosuke Osuka<sup>1</sup>, PhD; Narumi Kojima, MS<sup>1</sup>; Masamitsu Sugie<sup>2</sup>, MD, PhD; Takuya Omura<sup>3</sup>, MD, PhD; Keiko Motokawa<sup>1</sup>, PhD; Takuya Ueda<sup>4</sup>, PhD; Kazushi Maruo<sup>5</sup>, PhD; Risa Ono<sup>6</sup>, MS; Toshihiko Aoyama<sup>6</sup>; Shigeru Inoue<sup>7</sup>, MD, PhD; Hunkyung Kim<sup>1</sup>, PhD; and Hiroyuki Sasai<sup>1</sup>, PhD

<sup>1</sup>Research Team for Promoting Independence and Mental Health, Tokyo Metropolitan Institute of Gerontology, Tokyo, Japan

<sup>2</sup>Department of Cardiology, Tokyo Metropolitan Geriatric Hospital and Institute of Gerontology, Tokyo, Japan

<sup>3</sup>Department of Geriatric Medicine, Tokyo Metropolitan Institute of Gerontology, Tokyo, Japan

<sup>4</sup>The Tokyo Metropolitan Support Center for Preventative Long-term and Frail Elderly Care, Tokyo Metropolitan Institute of Gerontology, Tokyo, Japan

<sup>5</sup>Department of Biostatistics, Faculty of Medicine, University of Tsukuba, Tsukuba, Japan

<sup>6</sup>Japan Radio-Taiso Federation, Tokyo, Japan

<sup>7</sup>Department of Preventive Medicine and Public Health, Tokyo Medical University, Tokyo, Japan

### Corresponding author

Yosuke Osuka, PhD

Research Team for Promoting Independence and Mental Health,  
Tokyo Metropolitan Institute of Gerontology

35-2 Sakae-cho, Itabashi-ku, Tokyo 173-0015, Japan.

Phone: +81-3-3964-3241; Email: osuka@tmig.or.jp

### Word count

5295/4000 words

## Abstract

### Introduction

Few clinical trials have examined the effects of home-based exercise programmes on health-related quality of life (HR-QoL) in older adults with frailty. Radio-Taiso is the most famous exercise programme in Japan, and a home-based Radio-Taiso exercise programme can serve as an accessible, scalable, and sustainable care intervention for this population. The primary aims of this trial is to test whether older adults with frailty who attend our home-based Radio-Taiso exercise programme will receive greater benefits to HR-QoL than those who do not. Potential mechanisms explaining the effectiveness of the programme will be identified, as well as the effects of its use on daily lifestyle.

### Methods and analysis

This is an assessor blind randomised controlled trial that will be conducted at the Tokyo Metropolitan Institute of Gerontology (TMIG) in Itabashi-ku, Tokyo, Japan. From April to May 2022, 226 older adults with pre-frailty or frailty by the revised Japanese version of the Cardiovascular Health Study criteria will be included from a large database of the TMIG. After the baseline assessment in June 2022, participants will be randomly assigned to the intervention (home-based Radio-Taiso exercise and nutrition programme) or control groups (nutrition programme) in a 1:1 ratio. After intervention completion, a follow-up assessment will be conducted in September 2022. The primary outcome is the change in the mental domain of HR-QoL. Secondary outcomes include physical and role/social domains and subscales of HR-QoL, frailty phenotype, physical fitness, posture, cognition, exercise self-efficacy, depressive symptoms, brain-derived neurotrophic factor, social network, habitual energy intake, physical activity, and sleep conditions.

### Ethics and dissemination

The research protocol has been approved by the Research Ethics Committee of TMIG. This trial will be conducted in accordance with the principles of the Declaration of Helsinki. The findings will be presented at an international academic conference and published in peer-reviewed international journals.

### Trial registration

Registry name: UMIN-CTR

URL: [https://center6.umin.ac.jp/cgi-open-bin/ctr\\_e/ctr\\_view.cgi?recptno=R000053863](https://center6.umin.ac.jp/cgi-open-bin/ctr_e/ctr_view.cgi?recptno=R000053863)

### Protocol version

Date: 18 March 2022

Version identifier:4.2

### Strengths and Limitations

- The feasibility of this Phase III trial has been enhanced based on the processes, resources, management, and scientific data of the pilot trial.
- The trial will include older adults with frailty defined by a validated assessment tool.
- Random allocation, the blinding of assessors and analysts, interpretation of results based on the intention-to-treat principle, and disclosure of protocol papers reduce the risk of selection, measurement, reduction, and reporting bias.
- The non-blinding of allocation information to participants and care providers increases the risk of performance bias.
- It is unclear to what extent the findings from this study can be generalised to non-Japanese populations.

## INTRODUCTION

Frailty is defined as when homeostatic responses to stressors becomes vulnerable owing to a cumulative age-related decline of physiological systems.[1] A research showed that 7% and 47% of older adults had frailty and pre-frailty, respectively, and their risk of falls, disabilities, nursing home admission, and death was significantly higher than those of robust older adults.[2] Interventions to reduce frailty prevalence/severity can benefit older adults with care needs, the caregivers, and the public social insurance system. However, clinical trials involving older adults with frailty defined by validated assessment tools are required for confirming the effectiveness of such interventions.[1]

Interventions such as exercise and nutritional programmes are useful in reducing the prevalence of frailty, but stakeholders have shown concerns that research on such interventions has focused exclusively on improving physical outcomes.[3] Studies focused on patient-reported outcomes (e.g. health-related quality of life [HR-QoL]) may be able to address such gap between scientific evidence and clinical practice.[4] Exercise interventions are reportedly the most effective in improving HR-QoL among older adults with frailty.[5] To enhance this argument's reliability/validity, robust clinical trials should be conducted on the effects of such interventions.[5] However, evidence on the effects of home-based exercise interventions on HR-QoL remains uncertain.[6] As older adults with frailty have declined mobility, [7] readily available home-based exercise programmes may be feasible and rational interventions.

Radio-Taiso is the most famous Japanese exercise programme, with around 96.9% of the national population reportedly knowing about the program.[8] In 1928, the Postal Life Insurance Bureau of the Ministry of Communications (successor agency: Japan Post Insurance Co., Ltd.) developed Radio-Taiso as a "National Health Exercise" to improve the Japanese people's health.[9] Since then, Radio-Taiso has been customarily practiced in numerous Japanese homes/schools/workplaces/communities and is currently firmly established in the Japanese culture (Figure 1).[10] It is broadcasted daily by the Japan Broadcasting Corporation via public radio and television, making it easy for Japanese older adults with frailty to access it at home.

We recently conducted a pilot randomised controlled trial to examine the feasibility and potential effectiveness of a home-based Radio-Taiso exercise programme in community-dwelling older adults with pre-frailty and frailty. It showed high adherence and that the programme can lead to clinically important improvements in the mental domain of HR-QoL (submitted to a journal). However, the programme's effectiveness remains to be validated by robust clinical trials.

This trial primarily aims at testing whether older adults with pre-frailty and frailty

1  
2  
3  
4  
5  
6 who receive the programme obtain greater benefits on the mental domain of HR-QoL  
7 than those who do not receive it. It also aims at identifying the potential mechanisms  
8 explaining the effectiveness of the programme, and the impacts on the participants'  
9 lifestyles (Figure 2).  
10  
11

## 12 13 **METHODS AND ANALYSIS**

### 14 **Study design, setting, procedure, and ethics**

15  
16 This is a randomised, assessor-blind, parallel-design, two-arm, phase III trial. The  
17 protocol was designed in accordance with the SPIRIT statement (Supplementary Material  
18 1) and with some aspects of the SPIRIT-PRO Extension.  
19

20  
21 All outcomes will be assessed at the Tokyo Metropolitan Institute of Gerontology  
22 (TMIG) in Itabashi-ku, Tokyo, Japan; participants will practice the programme at their  
23 homes. Six face-to-face group sessions will be conducted at the TMIG or a nearby  
24 community facilities (Figure 3). Recruitment will be conducted in April 2022, and  
25 informed consents will be obtained in the subsequent month (May 2022). The baseline  
26 and follow-up assessments will be conducted in June and September 2022, respectively.  
27 After baseline assessment, participants who meet eligibility criteria will be included in  
28 the trial and randomly assigned to the intervention (home-based Radio-Taiso exercise  
29 programme + nutrition programme) or control (nutrition programme) groups. The  
30 intervention will begin in June and end in September 2022.  
31

32  
33 The Research Ethics Committee of TMIG approved the protocol on 16 December  
34 2021. The study protocol was registered with the University Hospital Medical  
35 Information Network Clinical Trials Registry (UMIN-CTR) on 20 March 2022 (trial  
36 registration no. UMIN000047229). All amendments to the study protocol will be  
37 disclosed to UMIN-CTR.  
38

### 39 **Participants**

40  
41 Inclusion criteria are: 1) aged 65 years or older; and 2) frailty or pre-frailty as  
42 defined by the revised Japanese version of the Cardiovascular Health Study (J-CHS)  
43 criteria (see below).  
44

45  
46 Exclusion criteria are: 1) inability to participate in both baseline and follow-up  
47 assessments; 2) diagnosed with dementia or prescribed anti-dementia drugs; 3) impaired  
48 in basic activities of daily living; 4) not allowed to exercise (except for light-intensity  
49 exercise) by the family physician; 5) unstable/severe medical conditions that prevent trial  
50 physicians from allowing study participation; 6) history of angina pectoris, myocardial  
51 infarction, or cardiac surgery for the past 3 months, having a terminal illness, or receiving  
52 palliative care; 7) practising the exercises in Radio-Taiso  $\geq 1$  day/week for the past month;  
53  
54  
55  
56  
57  
58  
59  
60

1  
2  
3  
4  
5  
6 8) participating in a specific rehabilitation programme; 9) unable to walk  $\geq 10$  m  
7 independently; 10) participating or will participate in other clinical trials; 11) not having  
8 a television at home; 12) difficulty in communicating in Japanese; 13) judged by the  
9 principal investigator/trial physicians to be ineligible; and 14) cannot give their consent  
10 to participate.  
11

12  
13 Potential participants will be recruited from a large database of trial-ready cohorts  
14 managed by the TMIG. In our pilot trial in 2020, 902 individuals were newly enrolled or  
15 had their information updated. Of these, 186 (20.6%) met all eligibility criteria and were  
16 willing to participate. Thus, at least 1,097 new registrations or updates are required to  
17 ensure that the current randomized controlled trial reaches the target number of 226  
18 participants (rationale below).  
19

20  
21 Invitation letters will be sent to individuals diagnosed with frailty or pre-frailty  
22 between October 2021 and March 2022. The eligibility criteria checklist will be enclosed  
23 with the invitation letter. Participants who meet all eligibility criteria and wish to  
24 participate will be given a detailed verbal explanation of the study (i.e. aims, procedures,  
25 confidentiality, possible benefits/disadvantages, anticipated risks, and how the risks will  
26 be addressed). Only those who provide written informed consent will partake in the study.  
27 If there are more people willing to participate than the target sample size, participants will  
28 be randomly selected using a computer-generated random sequence. During baseline  
29 assessment, trial physicians will check compliance with exclusion criteria 2, 5, and 6.  
30  
31

### 32 **Allocation and blinding**

33 After baseline assessment, participants will be randomly allocated to the  
34 intervention and control groups in a 1:1 ratio. The sequence for generating the allocation  
35 code will be stratified by sex (male, female), age ( $< 75$  or  $\geq 75$  years), and frailty severity  
36 (pre-frail or frailty), and blocking will be applied.  
37

38 The principal investigator (YO) at the TMIG will send eligible participants'  
39 identification codes to an allocator (KM) who has no contact with any participant. KM  
40 will combine the codes with a prescribed randomisation code, which will be generated  
41 prior to baseline assessment. An independent research staff member will inform  
42 participants of their group based on the allocation code sent by KM. Group labels will not  
43 be disclosed to the assessor and statistical analyst until the primary analysis is complete.  
44

### 45 **Intervention**

46 During the 12-week intervention period, participants will be asked not to start new  
47 exercise or nutrition programmes. To address the ethical disadvantages of the control  
48 group, a nutrition programme will be provided to both groups.  
49  
50  
51  
52  
53  
54  
55  
56  
57  
58  
59  
60



## Home-based Radio-Taiso exercise programme

Radio-Taiso includes three exercise patterns: Radio-Taiso No. 1 and 2 and Minna no Taiso. These patterns comprise 8–13 rhythmic whole-body movements with music. Each pattern starts with a low-intensity movement, gradually increases intensity, and ends with another low-intensity movement, allowing anyone to practise it safely. The smooth execution of movements requires fitness in various physical domains (strength, flexibility, endurance, and balance), making Radio-Taiso a multi-component exercise programme (details in Supplementary Material 2).

The home-based programme comprises six 60-min face-to-face group sessions with a certified instructor from the Japan Radio-Taiso Federation and daily practise in participants' homes. Before the programme, the intervention group will receive a face-to-face group session on how to correctly perform the three exercise patterns. In the first four weeks of the intervention, they will receive a face-to-face group session on how to effectively perform these exercise programmes. In week 8, a face-to-face group session will be provided to review the key points of each exercise programme.

Participants will be asked to complete a three-pattern exercise programme once daily at home by themselves via a broadcast by the Japan Broadcasting Corporation or a DVD. If the participants feel unwell while doing any exercise or feel that the exercise intensity is too high, they will be instructed to stop or reduce the number of sessions. Participants will be asked to record the following information in an exercise diary: 1) whether they perform the exercise programme; and 2) whether they comply with the key points for the effective implementation of the programme. On the day of the face-to-face group session, the research staff will check the exercise diary, adverse events, and participation in the new rehabilitation programme. In weeks when this session is not provided, these details will be checked by telephone every fortnight.

The pilot trial confirmed good adherence to the home-based Radio-Taiso exercise programme (retention rate: 100%; median [interquartile range] of practice rate: 97.6 [88.1–98.8] %). However, no trend towards improvement in physical outcomes was observed. To provide participants with a programme that yields better physical outcomes, the number of face-to-face sessions will increase from three to six and will include processes that help familiarise participants with the key points of the programme. An item will be also added to the exercise diary to check compliance with these points.

## Nutrition programme

The nutrition programme comprises: 1) distribution of a nutrition leaflet; 2) recording of a dietary variety score; and 3) telephone nutrition counselling. One week before intervention onset, participants will receive a face-to-face briefing from a dietitian

1  
2  
3  
4  
5  
6 on how the programme will work. A nutrition leaflet will be distributed once per week  
7 during the first four weeks of the intervention, detailing the nutritional role and  
8 recommended intake amounts of protein, calcium, vitamins/minerals, and  
9 carbohydrates/fats, as well as specific recipes for the efficient intake of these nutrients.  
10 Participants will be asked to record daily in a nutrition diary whether they have consumed  
11 10 food groups (meat, seafood, eggs, soya and soya products, milk, green and yellow  
12 vegetables, seaweed, potatoes, fruit, and oil) using a dietary variety score; specifically,  
13 they will be requested to provide a score on the intake of these food groups on a 10-point  
14 scale.[11] A high dietary variety score has been reported to be associated with lower  
15 frailty severity.[12] Participants will be allowed to call the dietitian one day per week to  
16 discuss how to proceed with this nutrition programme or if they have any questions.  
17  
18  
19  
20  
21  
22

### 23 **Outcome measures**

24  
25 The primary outcome is change in the mental component summary (MCS) score  
26 of HR-QoL. Secondary outcomes are the physical component summary (PCS) score,  
27 role/social component summary (RCS) score, and eight subscales of HR-QoL, as well as  
28 frailty phenotype, physical fitness, posture, cognition, exercise self-efficacy, depressive  
29 symptoms, brain-derived neurotrophic factor (BDNF), social network, habitual energy  
30 intake, physical activity, and sleep conditions.  
31  
32  
33  
34  
35

### 36 **Baseline information**

37 Baseline information includes age, sex, disease history (hypertension, heart  
38 disease, diabetes, hyperlipidemia, osteoporosis, and respiratory disease), and low-back  
39 and knee pain. This information will be obtained by face-to-face interview.  
40  
41  
42

### 43 **Assessments**

44 Some objective outcomes will be assessed by research staff that will be blinded  
45 to allocation information.  
46

#### 47 **HR-QoL**

48  
49 The HR-QoL will be assessed using the Japanese version of the SF-36, which is  
50 widely used, reliable, and validated worldwide.[13 14] It measures eight health concepts:  
51 physical function, physical role, body pain, general health, vitality, social function,  
52 emotional role, and mental health. These concepts are aggregated and scored into the  
53 MCS, PCS, and RCS (Figure 2).[15] These scores are then standardised as T-scores using  
54 the 2017 Japanese national norm.[16] A change of three or more points in the MCS or  
55 two or more points in the PCS is a minimal clinically important difference, allowing for  
56  
57  
58  
59  
60

1  
2  
3  
4  
5  
6 the clinical interpretation of the change in scores.[17]  
7

### 8 9 Frailty phenotype

10 Frailty phenotype will be assessed using Fried's frailty criteria, characterised by  
11 five limitations: slowness, weakness, exhaustion, low activity, and weight loss. The trial  
12 will use the revised J-CHS criteria to define frailty (three or more limitations) and pre-  
13 frailty (one or two limitations).[18]  
14

#### 15 *Slowness*

16 Slowness is assessed based on usual gait speed. An 11 m walking path is used  
17 with a 3 m acceleration/deceleration path at each end. The assessor measures the time  
18 taken between the 3 and 8 m markers.[19] The measurement will be performed once, and  
19 slowness is defined as a gait speed of less than 1.0 m/sec.  
20  
21

#### 22 *Weakness*

23 Weakness is assessed by grip strength using a handheld Smedley-type  
24 dynamometer; participants are instructed to grip the device as strong as possible with their  
25 dominant hand in a standing position.[19] The measurement will be performed once, and  
26 weakness is defined as less than 28 kg for men and less than 18 kg for women.  
27  
28

#### 29 *Exhaustion*

30 Exhaustion is assessed using question 25 of the Kihon checklist developed by the  
31 Ministry of Health, Labour and Welfare:[20] "In the last 2 weeks, have you felt tired for  
32 no reason?" Exhaustion is defined by a "yes" response.  
33  
34

#### 35 *Low activity*

36 Low activity is assessed using two simple questions about participation in exercise  
37 or physical activity: 1) "How often do you engage in light intensity exercise or  
38 calisthenics?" And 2) "How often do you engage in exercise or sports activities"? Low  
39 activity is defined by a "less than once a week" response to both questions.  
40  
41

#### 42 *Weight loss*

43 Weight loss is assessed using question 11 of the Kihon checklist developed by the  
44 Ministry of Health, Labour and Welfare:[20] "Have you lost 2 kg or more in the past six  
45 months?" Having weight loss is defined by a "yes" response.  
46  
47

### 48 Physical fitness

49 Six physical fitness domains (agility/dynamic balance, lower body strength, upper  
50 body strength, lower body flexibility, upper body flexibility, and aerobic endurance) will  
51 be assessed using Senior Fitness Tests.[21]  
52  
53

#### 54 *Agility and dynamic balance*

55 Agility and dynamic balance are assessed using the 8-foot up-and-go test.  
56  
57  
58  
59  
60

1  
2  
3  
4  
5  
6 Participants will be instructed to stand up at the start signal, walk around a cone 8 ft away,  
7 turn around, and sit down again; this sequence should be performed as quickly as possible.  
8 After one practise session, two trials are performed, and the values for the minimum time  
9 required will be used in the analysis.  
10

#### 11 *Lower body strength*

12  
13 Lower body strength is assessed using the chair stand test. At test onset,  
14 participants are instructed to stand up and sit down again while having their arms crossed  
15 in front of the chest. After 2–3 practice sequences of this exercise, a single trial will be  
16 performed, in which this sequence is repeated as quickly as possible for 30 s. The values  
17 of the number of sequences achieved will be used in the analysis.  
18  
19

#### 20 *Upper body strength*

21  
22 Upper body strength is assessed using the arm curl test. Participants will be  
23 requested to flex and extend the elbow of the dominant arm while holding a dumbbell (3  
24 kg for men and 2 kg for women) at the start signal, with both upper arms in a natural  
25 down position. After 2–3 practice sequences, a single trial will be performed, in which  
26 the sequence will be repeated as quickly as possible for 30 s.  
27  
28

#### 29 *Lower body flexibility*

30  
31 Lower body flexibility is assessed using the chair sit-and-reach test. Participants  
32 are requested to sit shallowly in a chair and extend their dominant leg. Then, they are  
33 instructed to place the fingertips of both hands together, slowly flex the upper body  
34 towards the toes of the dominant leg until reaching their limit, and remaining still for 2  
35 seconds. The assessor measures the distance between the participant's toes of the  
36 dominant leg and the fingertips of both hands using a ruler. A plastic block is placed on  
37 the sole of the foot to hold the ankle joint at 90°. After two practice sessions, the  
38 measurements will be performed twice, and the best values will be used in analysis.  
39  
40

#### 41 *Upper body flexibility*

42  
43 Upper body flexibility is assessed using the back scratch test. In an upright  
44 position, the participant is instructed to rotate the dominant hand backwards obliquely  
45 upward and the non-dominant hand backwards obliquely downward to the posterior  
46 region. The assessor measures the shortest distance between the middle fingers of both  
47 hands using measuring tape. The measurement will be performed twice and the best  
48 values will be used in analysis.  
49  
50

#### 51 *Aerobic endurance*

52  
53 Aerobic endurance is assessed using a 2-minute step-in-place test. The assessor  
54 marks a wall with masking tape midway between the participant's patella and iliac crest.  
55 The participant stands up right next to the wall and is asked to march in place for 2 min.  
56  
57  
58  
59  
60

1  
2  
3  
4  
5  
6 Participants who have difficulty marching for the two minutes are allowed to take a break  
7 and hold the wall or a stable chair. The assessor records the number of times the right  
8 knee reaches the marker within 2 minutes. The trial will be conducted once.  
9

## 10 Anthropometric indices

### 11 *Body height, weight, and body mass index*

12  
13 Height will be measured using a digital height meter (DSN-70; MURATEC-KDS  
14 Corporation). Body weight is measured using a body composition analyser (InBody770,  
15 InBody Co. Ltd., Seoul, Korea). Body mass index is calculated by dividing the weight  
16 (kg) by the square of the height (m).  
17  
18

### 19 *Posture*

20  
21 Posture will be assessed by the degree of kyphosis and the range of motion of the  
22 spine. The degree of kyphosis is assessed by the kyphosis angle (KA),[22] thoracic KA,  
23 and lumbar lordosis angle.[23 24]  
24  
25

26  
27 The KA is measured using a small gyro-embedded device (Horizon; Yuki Trading  
28 Corporation, Japan). The participant is first instructed to stand in a normal posture, and  
29 then the evaluator checks the seventh cervical vertebra (C7), posterior superior iliac spine  
30 (PSIS), and kyphosis vertex using palpation and visual examination. The arm of the  
31 device is aligned with the C7 and kyphosis vertices and the angle is measured.  
32 Subsequently, the arm of the device is aligned with the kyphosis vertex and the midpoint  
33 of the PSIS, and the angle is measured. The trial is conducted once. KA is calculated from  
34 the following formula:  $KA (^{\circ}) = 180^{\circ}$  (straight line angle between C7 and kyphosis vertex  
35 + straight line angle between the kyphosis vertex and the midpoint of the PSIS). The  
36 smaller the angle, the severer the kyphosis.[22]  
37  
38

39  
40 Thoracic KA and lumbar lordosis angles are measured using the Idiag M360  
41 (Idiag AG, Switzerland). The participant is first instructed to stand in a normal position,  
42 and then the assessor moves the Idiag M360 along the spinous processes from the vertebra  
43 prominens (C7) to the third cervical vertebra (C3). The trial is conducted once, and the  
44 smaller the angle of the thoracic KA, the severer the kyphosis, whereas the larger the  
45 lumbar lordosis angle, the severer the kyphosis.[23 24]  
46  
47

48  
49 The range of motion of the spine is measured using the Idiag M360 (Idiag AG,  
50 Switzerland).[23 24] The assessor moves the Idiag M360 over the spinous processes from  
51 C7 to C3 in the maximum forward flexion and extension positions. Range of motion is  
52 assessed as the difference between the thoracic KA and lumbar lordosis angle at  
53 maximum forward flexion and maximum extension, based on the angles measured for the  
54 thoracic KA and lumbar lordosis angle.  
55  
56  
57  
58  
59  
60

## Cognition

Attention and executive function will be assessed using Parts A and B of the trail making test (TMT).[25] In Part A, participants must connect the numbers in ascending order, and the time taken for finalizing the task is measured (i.e. 1-2-3-4...). In Part B, the task is to connect the numbers and kana characters in an alternating order (i.e. 1-A-2-I...), and the time taken for finalizing the task is measured.

## Home-based exercise self-efficacy

The participants' home-based exercise self-efficacy will be assessed using the Home-Exercise Barrier Self-Efficacy Scale.[26] Participants are asked to respond to six exercise situations at home (1: when I am tired, 2: when I am in pain, 3: when I do not feel very good, 4: when I do not have time, 5: when I do not have the equipment or environment to exercise, 6: when I am alone) on a 5-point Likert scale ranging from 1 (*not at all confident*) to 5 (*absolutely confident*). Details on items and scoring are described in prior research.[26] Total scores range from 5–30, with higher scores indicating greater self-efficacy in home-based exercise.

## Depressive symptoms

Depressive symptoms will be assessed using the short version of the Geriatric Depression Scale.[27] Participants are asked to answer to 15 yes-or-no questions about their daily mood. Details on items and scoring are described in prior research.[27] Total scores range from 0–15, with higher scores indicating a more depressed mood.

## BDNF

BDNF is the most widely expressed neurotrophic in the mammalian brain and an important regulator of the development and function of neural circuits in the brain.[28] Exercise-induced BDNF mediates neuronal differentiation and growth, synapse formation and plasticity, and may explain how exercise training improves mental health and cognitive function.[29]

Participants will fast for at least two hours and a blood sample will be collected from the anterior elbow vein. To exclude the potential effects of acute exercise, participants will be asked to refrain from engaging in vigorous intensity exercise for 36 hours before the blood sample is collected. To control for diurnal variation, participants will have their blood drawn at the same time of day in both the baseline and follow-up assessments. Blood samples will be processed according to the manufacturer's specifications: plasma

1  
2  
3  
4  
5  
6 is obtained by centrifugation at 2,000 g for 15 min at 24°C, aliquoted, and stored at -80°C  
7 until measurement. Plasma samples will be assessed for BDNF concentrations using a  
8 commercially available two-site sandwich enzyme-linked immunosorbent assay kit  
9 (R&D Systems, Minneapolis, MN, USA). The analysis is conducted centrally in an  
10 independent laboratory.  
11  
12

### 13 14 15 Social network

16 Social network will be assessed using the Japanese version of the Lubben Social  
17 Network Scale-6 (LSNS-6).[30] Participants answer to six questions on support the  
18 number of family members and friends who can provide them with five options of  
19 emotional and instrumental support. Details on items/scoring are described in prior  
20 research.[30] Total scores range from 0–30, with higher scores indicating a larger social  
21 network.  
22  
23  
24

### 25 26 27 Habitual energy intake

28 Habitual energy intake will be assessed using a reliable and valid brief self-  
29 administered diet history questionnaire developed to provide a simple estimate of energy  
30 intake over the past month.[31 32] Participants are asked to recall their average dietary  
31 habits over the past month and indicate the frequency of consumption of each food item.  
32 Habitual energy intake will be calculated using a special software provided by Gender  
33 Medical Research Co. Japan.  
34  
35  
36  
37

### 38 39 Habitual physical activity

40 Habitual physical activity levels will be assessed based on the average number of  
41 steps taken per day. The number of steps will be measured using validated tri-axis  
42 accelerometers and algorithms (Active style Pro HJA-750C; Omron Healthcare, Tokyo,  
43 Japan).[33 34] The participants are instructed to wear the device around the waist for 7  
44 days during all activities of daily living from waking to bedtime, except for underwater  
45 activities (e.g. bathing and swimming). A record is valid if the device is worn for at least  
46 10 h/day.[35] If valid records are collected for more than three days, the number of steps  
47 per day is calculated.  
48  
49  
50  
51  
52

### 53 54 Habitual sleep conditions

55 Sleep condition will be subjectively assessed using the Japanese version of the  
56 Pittsburgh Sleep Quality Index,[36 37] comprising 7 components: sleep quality, time to  
57 fall asleep, time to stay asleep, sleep efficiency, difficulty sleeping, use of sleeping pills,  
58  
59  
60

1  
2  
3  
4  
5  
6 and difficulty waking up during the day in the past month. Details on items and scoring  
7 are described in prior research.[36 37] Total scores range from 0–21, with higher scores  
8 indicating a worse subjective sleep condition.  
9

10 Sleep condition will also be objectively assessed using validated tri-axis  
11 accelerometers and algorithms (ActiGraph GT3X + ActiGraph, FL, USA). Participants  
12 will be asked to wear the device on the wrist of their non-dominant arm for 7 days. Sleep  
13 parameters will include sleep duration (time spent in bed during which the person is  
14 judged to be asleep), sleep efficiency (percentage of time spent in bed that is actually  
15 spent asleep), sleep latency (time between getting into bed and during which the person  
16 is judged to be asleep), awake after sleep onset (time spent awake after being judged to  
17 be asleep), and the number of awakenings (the number of awakenings after being judged  
18 to be asleep). These parameters are calculated using the algorithm (Cole-Kripke method)  
19 installed in the dedicated analysis software (ActiLife ver. 6.13.4).[38]  
20  
21  
22  
23  
24  
25

### 26 **Adverse events**

27 Adverse events are defined in this study as any undesirable/unintended sign,  
28 symptom, or disease occurring during the intervention, regardless of causality. The  
29 number of adverse events that occur during the intervention period will be assessed. Trial  
30 physicians will determine adverse event severity and potential relevance to the  
31 intervention. Any adverse events (e.g. subjective symptoms, falls, and other surgical or  
32 medical findings) suspected to relate to the intervention will be recorded. Research staff  
33 will ask participants if they have experienced an adverse event by telephone or in person  
34 every fortnight.  
35  
36  
37  
38  
39  
40

### 41 **Adherence**

42 Adherence will be assessed by the retention rate during the intervention period  
43 and the rate of practice of the Radio-Taiso exercise programme. Retention rate is  
44 calculated as the percentage of participants who complete the follow-up assessment. The  
45 rate of practice of the programme is calculated by dividing the number of practice days  
46 (days when the exercises are practiced at least once a day) by 84 days. The total number  
47 of practice sessions of the programme will also be assessed.  
48  
49  
50  
51  
52

### 53 **Sample size**

54 Based on the pilot trial, the effect size (Cohen's d) of the programme on MCS  
55 score was 0.395. Using G\*Power version 3.1.9.2 for Windows (Heinrich-Heine-  
56 Universität Düsseldorf),[39] with the alpha error set at 5%, a power of 80%, and this  
57  
58  
59  
60



1  
2  
3  
4  
5  
6 effect size, the sample required was 204. Considering a 10% drop-out rate, the target  
7 sample is 226.  
8  
9

### 10 **Data management**

11 Data quality control comprises 1) measurements based on established standard  
12 operating procedures, 2) manual checks (visual checks) of questionnaires and case reports,  
13 and 3) data entry using the double-entry method. Manual checks include confirmation of  
14 compliance with eligibility criteria, missing measurements, and value ranges. After all  
15 the data are entered, the person responsible for the analysis will perform logical check  
16 (programming check) and data coding to ensure and fix any issues pertaining to data  
17 quality. These checks include examining for outliers.  
18  
19  
20  
21  
22  
23

### 24 **Statistical analysis**

25 As “tests of baseline homogeneity” in randomized controlled trials do not have  
26 any practical value,[40] comparison of baseline characteristics will not be performed in  
27 this study. At baseline, continuous variables are presented as mean (standard deviation)  
28 or median (interquartile range) and categorical variables as n (%).  
29  
30

#### 31 **Main analysis**

32 To test programme effectiveness, changes in the primary outcome will be  
33 compared between both groups using an ANCOVA model adjusted for allocation  
34 stratification factors and baseline values. Changes in secondary outcomes will be  
35 compared using the same model. Differences between groups in change for each outcome  
36 will be expressed as differences in adjusted means (95% confidence intervals). Statistical  
37 significance will be set at a  $P < 0.05$ .  
38  
39  
40

41 The results of the main analyses will be interpreted based on the intention-to-treat  
42 principle. All enrolled participants will be analysed, irrespective of whether they comply  
43 with the study protocol. It is permissible as a conservative analysis strategy to exclude  
44 participants: 1) who are subsequently found not to meet the eligibility criteria; 2) never  
45 participated in the intervention programme; or 3) for whom no post-randomisation data  
46 are available.[41] The full analysis set will exclude these participants and be applied as  
47 the primary analysis population.  
48  
49  
50

#### 51 **Additional analysis**

52 Additional analyses using a per-protocol set will be conducted to assess the extent  
53 to which adherence affects the results. The per-protocol set will include participants who  
54 have practiced at least 75% of the home-based Radio-Taiso exercises stipulated.[42]  
55  
56  
57

58 A sensitivity analysis will be performed to assess heterogeneity owing to missing  
59  
60

1  
2  
3  
4  
5  
6 follow-up data (missing bias). Missing data will be processed through multiple imputation  
7 by applying the chained equation method to generate 20 imputed datasets based on the  
8 outcome, allocation, and group variables at baseline.  
9

10 To assess study generalizability, subgroup analyses will be conducted based on  
11 participants' background data (male vs. female, <75 vs. ≥75 years, and frailty vs. pre-  
12 frailty).  
13

14 Retention rates and the incidence of adverse events (one or more for those who  
15 report them) will be compared between groups using Fisher's exact test or the  $\chi$ -square  
16 test. All analyses will be carried out using R, version 4.1.2 or higher (The R Foundation  
17 for Statistical Computing Platform).  
18  
19  
20  
21

### 22 **Patient and public involvement**

23 This study will be conducted without participant involvement. Participants will  
24 not be invited to comment on study design, define relevant outcomes or interpret the  
25 results, nor contribute to the writing or editing of this paper for readability or accuracy.  
26  
27  
28  
29

### 30 **ETHICS AND DISSEMINATION**

31 The research protocol has been approved by the Research Ethics Committee of  
32 the TMIG and will be conducted in accordance with the Declaration of Helsinki. Study  
33 results will be presented at an international scientific conference and reported in a peer-  
34 reviewed international journal. After publication, a summary of the results will be  
35 published on the TMIG and Japan Post Insurance Co., Ltd., websites.  
36  
37  
38  
39

### 40 **DISCUSSION**

41 Few trials have examined the effect of exercise interventions on HR-QoL in older  
42 adults with frailty diagnosed by validated assessment tools.[3 5 6] Thus, this robustly  
43 designed trial will strengthen the evidence needed to support the effectiveness of home-  
44 based exercise programmes on HR-QoL. International health policy bodies, regulators  
45 and patients are increasingly recognizing the importance of patient-reported outcomes,  
46 including HR-QoL, for health.[43] The results of this study will provide valuable insights  
47 that may serve to address the evidence and clinical practice gaps associated with care  
48 programmes for older adults with frailty. This study will also contribute to a better  
49 understanding of the potential mechanisms by which home-based exercise programmes  
50 can improve HR-QoL by analysing various secondary outcomes.  
51  
52  
53  
54  
55

56 Researchers systematically compared HR-QoL between frailty and non-frailty  
57 groups, showing a moderate or greater standardised mean difference between the groups  
58  
59  
60

1  
2  
3  
4  
5  
6 and that the frailty group had a worse HR-QoL.[44] The measures to curb the COVID-19  
7 pandemic also limit the life-space mobility of older adults with frailty and have a  
8 significant impact on QoL.[45] Patient-reported outcomes from clinical trials using  
9 scientifically robust methodologies are reflected in clinical decision-making and  
10 influence health and social care policy.[43] Thus, if this study helps to clarify the  
11 effectiveness of the proposed programme on HR-QoL, this may enable for invested  
12 stakeholders to develop a policy framework for care programmes from the perspective of  
13 older adults with frailty.  
14  
15

16  
17  
18 For a care programme targeting people with frailty to be implemented in public  
19 health policy, it must have good accessibility (i.e. low cost and high  
20 acceptability/availability) and be delivered equitably and continuously.[4] A care  
21 programme that draws on existing cultural and social resources may be able to meet these  
22 requirements. In Japan, the Radio-Taiso exercise programme has a long history of being  
23 customarily watched in different settings and is familiar to many older adults, thus being  
24 a cultural exercise programme in the country.[10] In fact, our pilot trial confirmed that  
25 adherence to the programme is very good and that it is highly compatible with daily life.  
26 Radio-Taiso is also available with low-cost to everyone via television/radio on a daily  
27 basis. To date, more than 24,600 certified Radio-Taiso instructors have been trained, and  
28 there are more than 2,000 regional bases where the programme is practised  
29 nationwide.[46] Rich in cultural and social resources, the Radio-Taiso exercise  
30 programme may serve as a socially implementable public health strategy.  
31  
32

33  
34  
35  
36  
37 This study has several limitations. First, although the study addresses  
38 measurement, attrition, and reporting bias, participants and treatment providers will not  
39 be blinded to allocation information; this increases the risk of performance bias and  
40 reduce effect estimation accuracy. Second, calisthenic programmes like Radio-Taiso are  
41 popular in some countries, such as China, Korea, and Scandinavia, but it remains unclear  
42 to what extent the usefulness of the Radio-Taiso exercise programmes is generalisable to  
43 non-Japanese older adults with frailty.  
44  
45  
46  
47  
48

### 49 **Acknowledgments**

50 We are grateful to the participants and the staff members of the TMIG.  
51  
52

### 53 **Author contributions**

54  
55 Yosuke Osuka: study concept and design, data collection and interpretation,  
56 manuscript preparation. Narumi Kojima: study concept and design, data collection and  
57 interpretation, manuscript preparation. Masamitsu Sugie: study concept and design,  
58  
59  
60

1  
2  
3  
4  
5  
6 safety assessment, manuscript preparation. Takuya Omura: study concept and design,  
7 safety assessment, manuscript preparation. Keiko Motokawa: study concept and design,  
8 data collection and interpretation, manuscript preparation. Takuya Ueda: study concept  
9 and design, data collection and interpretation, manuscript preparation. Kazushi Maruo:  
10 study concept and design, statistical advice, randomization, data interpretation,  
11 manuscript preparation. Risa Ono: study concept and design, intervention, data  
12 interpretation, manuscript preparation. Toshihiko Aoyama: study concept and design,  
13 data interpretation, manuscript preparation. Shigeru Inoue: study concept and design, data  
14 interpretation, manuscript preparation. Hunkyung Kim: study concept and design, data  
15 interpretation, manuscript preparation. Hiroyuki Sasai: study concept and design, analysis,  
16 data interpretation, manuscript preparation.

### 23 24 **Funding**

25 This study will be conducted under a collaborative agreement between four  
26 institutions (TMIG, Tokyo Medical University, Japan Post Insurance Co., Ltd., and the  
27 Japan Radio-Taiso Federation). Japan Post Insurance Co., Ltd. will financially support  
28 the study and will provide the Radio-Taiso DVD free of charge, but will not be involved  
29 in the design of the study, selection of methods, recruitment of participants, data  
30 collection, analysis and interpretation, or writing of the manuscript.

31 The Japan Radio-Taiso Federation will provide certified Radio-Taiso instructors  
32 free of charge and will be involved in the design of the study, intervention, data  
33 interpretation, and writing of the manuscript.

### 34 35 **Competing interests**

36 Yosuke Osuka is the principal investigator of a joint research agreement between  
37 the four organisations; Risa Ono and Toshihiko Aoyama are accredited instructors for the  
38 Japan Radio-Taiso Federation. The Japan Post Insurance Co., Ltd. and the Japan Radio-  
39 Taiso Federation are committed to the promotion and dissemination of Radio-Taiso. The  
40 other authors have no conflicts of interest to declare.

### 41 42 **Patient consent**

43 Not applicable

### 44 45 **Ethics approval**

46 Approved by Research Ethics Committee of TMIG on 16 December 2021.

### 47 48 **Data availability statement**

49 Data are available upon reasonable request.

**REFERENCES**

1. Clegg A, Young J, Iliffe S, et al. Frailty in elderly people. *Lancet* 2013;381(9868):752-62.
2. Fried LP, Tangen CM, Walston J, et al. Frailty in older adults: evidence for a phenotype. *J Gerontol A Biol Sci Med Sci* 2001;56(3):M146-56.
3. Puts MTE, Toubasi S, Andrew MK, et al. Interventions to prevent or reduce the level of frailty in community-dwelling older adults: a scoping review of the literature and international policies. *Age Ageing* 2017;46(3):383-92.
4. Dent E, Martin FC, Bergman H, et al. Management of frailty: opportunities, challenges, and future directions. *Lancet* 2019;394(10206):1376-86.
5. Negm AM, Kennedy CC, Thabane L, et al. Management of frailty: a systematic review and network meta-analysis of randomized controlled trials. *J Am Med Dir Assoc* 2019;20(10):1190-98.
6. Clegg AP, Barber SE, Young JB, et al. Do home-based exercise interventions improve outcomes for frail older people? Findings from a systematic review. *Rev Clin Gerontol* 2012;22(1):68-78.
7. Navarrete-Villanueva D, Gómez-Cabello A, Marín-Puyalto J, et al. Frailty and physical fitness in elderly people: a systematic review and meta-analysis. *Sports Med* 2021;51(1):143-60.
8. Japan Post Insurance Co., Ltd. Recognition and participation rates for "Radio-Taiso". 2021 [Available from: <https://www.jp-life.japanpost.jp/information/assets/pdf/211011pr-6-2.pdf> accessed March 10 2022.
9. Public Relations Office, Government of Japan. Highlighting Japan 2019 [14-15]. Available from: [https://dwl.gov-online.go.jp/video/cao/dl/public\\_html/gov/book/hlj/20191001/html5.html#page=15137](https://dwl.gov-online.go.jp/video/cao/dl/public_html/gov/book/hlj/20191001/html5.html#page=15137).
10. British Broadcasting Corporation. The lifelong exercise that keeps Japan moving. 2020 [Available from: <https://www.bbc.com/worklife/article/20200609-the-life-long-exercise-that-keeps-japan-moving> accessed March 10 2022.
11. Kumagai S, Watanabe S, Shibata H, et al. [Effects of dietary variety on declines in high-level functional capacity in elderly people living in a community]. *Nihon Koshu Eisei Zasshi* 2003;50(12):1117-24.
12. Motokawa K, Watanabe Y, Edahiro A, et al. Frailty Severity and Dietary Variety in Japanese Older Persons: A Cross-Sectional Study. *J Nutr Health Aging* 2018;22(3):451-56.

13. Fukuhara S, Bitto S, Green J, et al. Translation, adaptation, and validation of the SF-36 Health Survey for use in Japan. *J Clin Epidemiol* 1998;51(11):1037-44.
14. Fukuhara S, Ware JE, Jr., Kosinski M, et al. Psychometric and clinical tests of validity of the Japanese SF-36 Health Survey. *J Clin Epidemiol* 1998;51(11):1045-53.
15. Suzukamo Y, Fukuhara S, Green J, et al. Validation testing of a three-component model of Short Form-36 scores. *J Clin Epidemiol* 2011;64(3):301-8.
16. Fukuhara S, Suzukamo Y. Manual of SF-36v2 Japanese version. Kyoto: iHope International Inc 2004, 2019.
17. Maruish ME. User's Manual for the SF-36v2 Health Survey: Quality Metric Incorporated 2011.
18. Satake S, Arai H. The revised Japanese version of the Cardiovascular Health Study criteria (revised J-CHS criteria). *Geriatr Gerontol Int* 2020;20(10):992-93.
19. Shinkai S, Watanabe S, Kumagai S, et al. Walking speed as a good predictor for the onset of functional dependence in a Japanese rural community population. *Age Ageing* 2000;29(5):441-6.
20. Sewo Sampaio PY, Sampaio RA, Yamada M, et al. Systematic review of the Kihon Checklist: Is it a reliable assessment of frailty? *Geriatr Gerontol Int* 2016;16(8):893-902.
21. Rikli RE, Jones CJ. Development and validation of a functional fitness test for community-residing older adults. *J Aging Phys Act* 1999;7(2):129-61.
22. Ueda T, Shiba Y, Watanabe S, et al. A New Device for Measuring Spinal Kyphosis: Validity and Reproducibility of Measurements Obtained Using a Small Gyro-embedded Device. *Journal of the Japanese Physical Therapy Association* 2015;18(1):41-41.
23. Mannion AF, Knecht K, Balaban G, et al. A new skin-surface device for measuring the curvature and global and segmental ranges of motion of the spine: reliability of measurements and comparison with data reviewed from the literature. *Eur Spine J* 2004;13(2):122-36.
24. Post RB, Leferink VJ. Spinal mobility: sagittal range of motion measured with the SpinalMouse, a new non-invasive device. *Arch Orthop Trauma Surg* 2004;124(3):187-92.
25. Army Individual Test Battery. Washington, DC: War Department: Adjutant General's Office 1944.
26. Arita N, Takenaka K, Shimazaki T. Development of a home-exercise barrier self-efficacy scale for elderly people requiring support and care. *Physical Therapy Japan* 2014;41(6):338-46.

- 1  
2  
3  
4  
5  
6 27. Yatomi N. The factor structure and item characteristic of the GDS (Geriatric  
7 Depression Scale) short version in a Japanese elderly sample. *Japanese Journal*  
8 *of Gerontology* 1994;16(1):29-36.
- 9  
10 28. Park H, Poo MM. Neurotrophin regulation of neural circuit development and function.  
11 *Nat Rev Neurosci* 2013;14(1):7-23.
- 12  
13 29. Knaepen K, Goekint M, Heyman EM, et al. Neuroplasticity - exercise-induced  
14 response of peripheral brain-derived neurotrophic factor: a systematic review of  
15 experimental studies in human subjects. *Sports Med* 2010;40(9):765-801.
- 16  
17 30. Kurimoto A, Awata S, Ohkubo T, et al. [Reliability and validity of the Japanese  
18 version of the abbreviated Lubben Social Network Scale]. *Nihon Ronen Igakkai*  
19 *Zasshi* 2011;48(2):149-57.
- 20  
21 31. Kobayashi S, Murakami K, Sasaki S, et al. Comparison of relative validity of food  
22 group intakes estimated by comprehensive and brief-type self-administered diet  
23 history questionnaires against 16 d dietary records in Japanese adults. *Public*  
24 *Health Nutr* 2011;14(7):1200-11.
- 25  
26 32. Kobayashi S, Honda S, Murakami K, et al. Both comprehensive and brief self-  
27 administered diet history questionnaires satisfactorily rank nutrient intakes in  
28 Japanese adults. *J Epidemiol* 2012;22(2):151-9.
- 29  
30 33. Oshima Y, Kawaguchi K, Tanaka S, et al. Classifying household and locomotive  
31 activities using a triaxial accelerometer. *Gait Posture* 2010;31(3):370-4.
- 32  
33 34. Ohkawara K, Oshima Y, Hikiyama Y, et al. Real-time estimation of daily physical  
34 activity intensity by a triaxial accelerometer and a gravity-removal classification  
35 algorithm. *Br J Nutr* 2011;105(11):1681-91.
- 36  
37 35. Troiano RP, Berrigan D, Dodd KW, et al. Physical activity in the United States  
38 measured by accelerometer. *Med Sci Sports Exerc* 2008;40(1):181-8.
- 39  
40 36. Doi Y, Minowa M, Uchiyama M, et al. Psychometric assessment of subjective sleep  
41 quality using the Japanese version of the Pittsburgh Sleep Quality Index (PSQI-J)  
42 in psychiatric disordered and control subjects. *Psychiatry Res* 2000;97(2-3):165-  
43 72.
- 44  
45 37. Doi Y, Minowa M, Okawa M, et al. Development of the Japanese version of the  
46 Pittsburgh Sleep Quality Index. *Japanese Journal of Psychiatry Treatment*  
47 1998;13(6):755-63 (in Japanese).
- 48  
49 38. Cole RJ, Kripke DF, Gruen W, et al. Automatic sleep/wake identification from wrist  
50 activity. *Sleep* 1992;15(5):461-9.
- 51  
52 39. Faul F, Erdfelder E, Lang AG, et al. G\*Power 3: a flexible statistical power analysis  
53 program for the social, behavioral, and biomedical sciences. *Behav Res Methods*  
54  
55  
56  
57  
58  
59  
60

- 2007;39(2):175-91.
40. Senn S. Testing for baseline balance in clinical trials. *Stat Med* 1994;13(17):1715-26.
  41. The International Council for Harmonisation. E9 Statistical Principles for Clinical Trials: The International Council for Harmonisation; 1998 [Available from: [https://database.ich.org/sites/default/files/E9\\_Guideline.pdf](https://database.ich.org/sites/default/files/E9_Guideline.pdf) accessed October 16 2021].
  42. Hawley-Hague H, Horne M, Skelton DA, et al. Review of how we should define (and measure) adherence in studies examining older adults' participation in exercise classes. *BMJ Open* 2016;6(6):e011560.
  43. Calvert M, Kyte D, Mercieca-Bebber R, et al. Guidelines for Inclusion of Patient-Reported Outcomes in Clinical Trial Protocols: The SPIRIT-PRO Extension. *JAMA* 2018;319(5):483-94.
  44. Crocker TF, Brown L, Clegg A, et al. Quality of life is substantially worse for community-dwelling older people living with frailty: systematic review and meta-analysis. *Qual Life Res* 2019;28(8):2041-56.
  45. Saraiva MD, Apolinario D, Avelino-Silva TJ, et al. The Impact of Frailty on the Relationship between Life-Space Mobility and Quality of Life in Older Adults during the COVID-19 Pandemic. *J Nutr Health Aging* 2021;25(4):440-47.
  46. The Japan Radio-Taiso Federation. Information of certified instructors and regional bases. 2022 [Available from: <https://www.radio-exercises.org/> accessed March 10 2022].

## FIGURE LEGENDS

**Figure 1.** Pictures of the Radio-Taiso as a firmly established, traditional Japanese exercise programme.

A: Community-dwelling children get together to practice Radio-Taiso. B: Physical education classes. C: Practice in the workplace. D: Gathering and practising during community events. All pictures are provided by courtesy of the Japan Post Insurance Co., Ltd.

**Figure 2.** A conceptual model to explain the mechanisms of the effect of the home-based Radio-Taiso exercise programme.

HR-QoL: health-related quality of life, PCS: physical component summary, MCS: mental component summary, and RCS: role/social component summary

**Figure 3.** Study flow diagram.

IC: informed consent, RT: Radio-Taiso



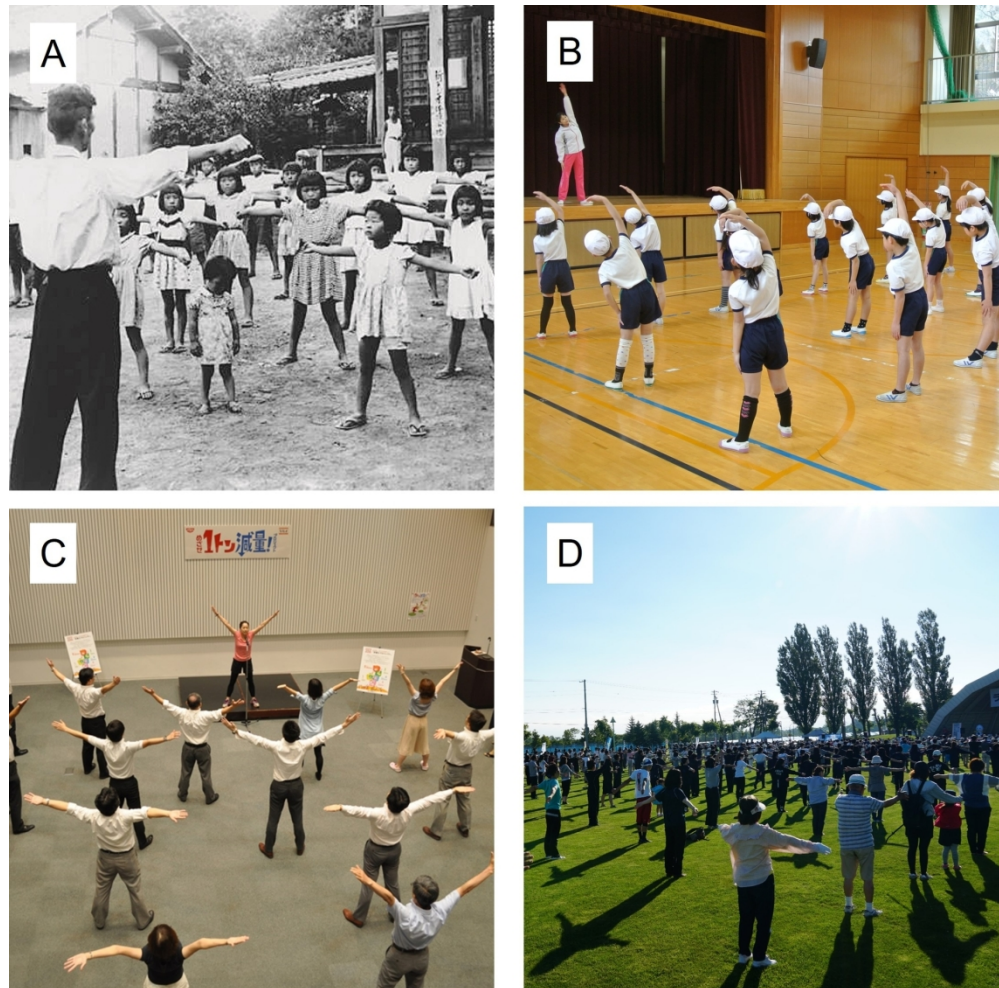

Figure 1. Pictures of the Radio-Taiso as a firmly established, traditional Japanese exercise programme. A: Community-dwelling children get together to practice Radio-Taiso. B: Physical education classes. C: Practice in the workplace. D: Gathering and practising during community events. All pictures are provided by courtesy of the Japan Post Insurance Co., Ltd.

169x166mm (300 x 300 DPI)

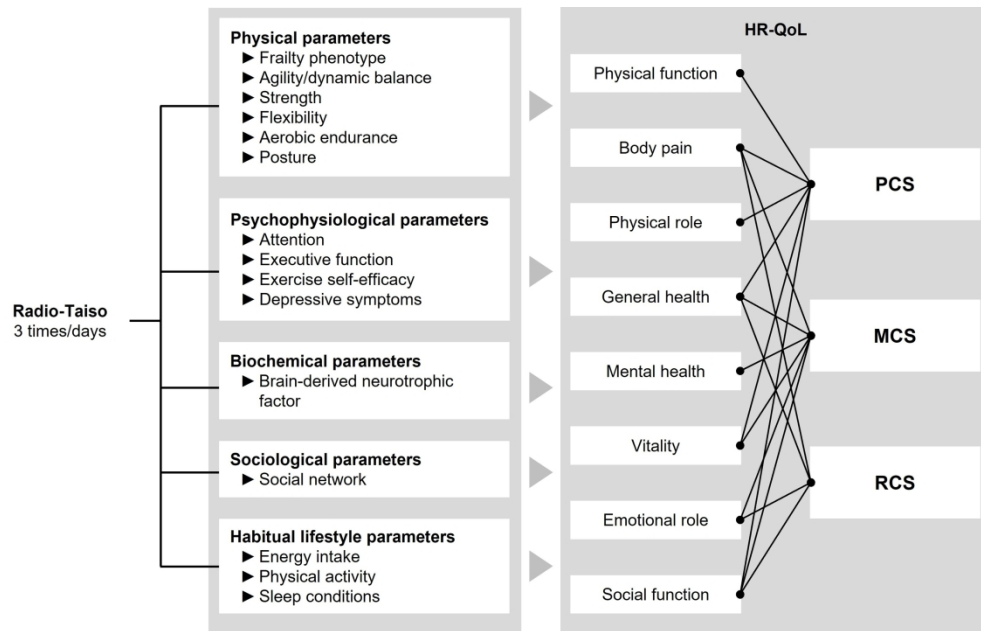

Figure 2. A conceptual model to explain the mechanisms of the effect of the home-based Radio-Taiso exercise programme. HR-QoL: health-related quality of life, PCS: physical component summary, MCS: mental component summary, and RCS: role/social component summary

255x160mm (300 x 300 DPI)

Figure 3. Study timeline of enrolment, interventions, and assessments.

| Study events           | Enrolment | IC  | Baseline assessment | Instruction | Intervention (84 days) |    |    |    |    |    |    |    | Follow-up assessment |    |
|------------------------|-----------|-----|---------------------|-------------|------------------------|----|----|----|----|----|----|----|----------------------|----|
|                        | Days      | -90 | -60                 | 0           | 7                      | 14 | 21 | 28 | 35 | 49 | 63 | 77 | 91                   | 98 |
| Allowance              | ±30       | ±3  | ±3                  | ±3          | ±3                     | ±3 | ±3 | ±3 | ±3 | ±3 | ±3 | ±3 | ±3                   | ±3 |
| <b>ENROLMENT:</b>      |           |     |                     |             |                        |    |    |    |    |    |    |    |                      |    |
| Eligibility assessment | X         | X   | X                   |             |                        |    |    |    |    |    |    |    |                      |    |
| IC                     |           | X   |                     |             |                        |    |    |    |    |    |    |    |                      |    |
| Allocation             |           |     | X                   |             |                        |    |    |    |    |    |    |    |                      |    |
| <b>INTERVENTIONS:</b>  |           |     |                     |             |                        |    |    |    |    |    |    |    |                      |    |
| RT exercise program    |           |     |                     | X           | X                      | X  | X  | X  |    | X  |    |    |                      |    |
| Nutrition program      |           |     |                     | X           | X                      | X  | X  | X  |    |    |    |    |                      |    |
| <b>ASSESSMENTS:</b>    |           |     |                     |             |                        |    |    |    |    |    |    |    |                      |    |
| Baseline variables     |           |     | X                   |             |                        |    |    |    |    |    |    |    |                      |    |
| Outcome variables      |           |     | X                   |             |                        |    |    |    |    |    |    |    |                      | X  |
| Adverse events         |           |     |                     |             |                        | X  |    | X  | X  | X  | X  | X  |                      |    |

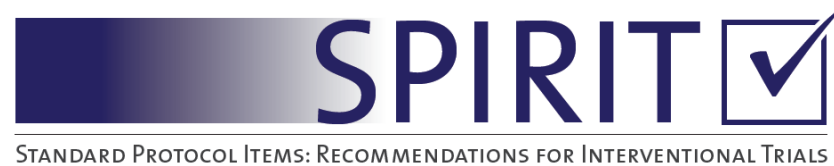

SPIRIT 2013 Checklist: Recommended items to address in a clinical trial protocol and related documents\*

| Section/item                      | Item No | Description                                                                                                                                                                                                                                                                              | Addressed on page number |
|-----------------------------------|---------|------------------------------------------------------------------------------------------------------------------------------------------------------------------------------------------------------------------------------------------------------------------------------------------|--------------------------|
| <b>Administrative information</b> |         |                                                                                                                                                                                                                                                                                          |                          |
| Title                             | 1       | Descriptive title identifying the study design, population, interventions, and, if applicable, trial acronym                                                                                                                                                                             | Page 1                   |
| Trial registration                | 2a      | Trial identifier and registry name. If not yet registered, name of intended registry                                                                                                                                                                                                     | Page 2                   |
|                                   | 2b      | All items from the World Health Organization Trial Registration Data Set                                                                                                                                                                                                                 | Not applicable           |
| Protocol version                  | 3       | Date and version identifier                                                                                                                                                                                                                                                              | Page 2                   |
| Funding                           | 4       | Sources and types of financial, material, and other support                                                                                                                                                                                                                              | Page 18                  |
| Roles and responsibilities        | 5a      | Names, affiliations, and roles of protocol contributors                                                                                                                                                                                                                                  | Pages 17–18              |
|                                   | 5b      | Name and contact information for the trial sponsor                                                                                                                                                                                                                                       | Page 18                  |
|                                   | 5c      | Role of study sponsor and funders, if any, in study design; collection, management, analysis, and interpretation of data; writing of the report; and the decision to submit the report for publication, including whether they will have ultimate authority over any of these activities | Page 18                  |
|                                   | 5d      | Composition, roles, and responsibilities of the coordinating centre, steering committee, endpoint adjudication committee, data management team, and other individuals or groups overseeing the trial, if applicable (see Item 21a for data monitoring committee)                         | Not applicable           |

|    |                                                           |     |                                                                                                               |            |
|----|-----------------------------------------------------------|-----|---------------------------------------------------------------------------------------------------------------|------------|
| 1  | <b>Introduction</b>                                       |     |                                                                                                               |            |
| 2  |                                                           |     |                                                                                                               |            |
| 3  | Background and                                            | 6a  | Description of research question and justification for undertaking the trial, including summary of relevant   | Page 4     |
| 4  | rationale                                                 |     | studies (published and unpublished) examining benefits and harms for each intervention                        |            |
| 5  |                                                           |     |                                                                                                               |            |
| 6  |                                                           | 6b  | Explanation for choice of comparators                                                                         | Page 4     |
| 7  |                                                           |     |                                                                                                               |            |
| 8  | Objectives                                                | 7   | Specific objectives or hypotheses                                                                             | Pages 4–5  |
| 9  |                                                           |     |                                                                                                               |            |
| 10 | Trial design                                              | 8   | Description of trial design including type of trial (eg, parallel group, crossover, factorial, single group), | Page 5     |
| 11 |                                                           |     | allocation ratio, and framework (eg, superiority, equivalence, noninferiority, exploratory)                   |            |
| 12 |                                                           |     |                                                                                                               |            |
| 13 |                                                           |     |                                                                                                               |            |
| 14 | <b>Methods: Participants, interventions, and outcomes</b> |     |                                                                                                               |            |
| 15 |                                                           |     |                                                                                                               |            |
| 16 | Study setting                                             | 9   | Description of study settings (eg, community clinic, academic hospital) and list of countries where data will | Page 5     |
| 17 |                                                           |     | be collected. Reference to where list of study sites can be obtained                                          |            |
| 18 |                                                           |     |                                                                                                               |            |
| 19 | Eligibility criteria                                      | 10  | Inclusion and exclusion criteria for participants. If applicable, eligibility criteria for study centres and  | Pages 5–6  |
| 20 |                                                           |     | individuals who will perform the interventions (eg, surgeons, psychotherapists)                               |            |
| 21 |                                                           |     |                                                                                                               |            |
| 22 | Interventions                                             | 11a | Interventions for each group with sufficient detail to allow replication, including how and when they will be | Pages 6–8  |
| 23 |                                                           |     | administered                                                                                                  |            |
| 24 |                                                           |     |                                                                                                               |            |
| 25 |                                                           | 11b | Criteria for discontinuing or modifying allocated interventions for a given trial participant (eg, drug dose  | Page 7     |
| 26 |                                                           |     | change in response to harms, participant request, or improving/worsening disease)                             |            |
| 27 |                                                           |     |                                                                                                               |            |
| 28 |                                                           | 11c | Strategies to improve adherence to intervention protocols, and any procedures for monitoring adherence        | Pages 7–8  |
| 29 |                                                           |     | (eg, drug tablet return, laboratory tests)                                                                    |            |
| 30 |                                                           |     |                                                                                                               |            |
| 31 |                                                           | 11d | Relevant concomitant care and interventions that are permitted or prohibited during the trial                 | Page 6     |
| 32 |                                                           |     |                                                                                                               |            |
| 33 | Outcomes                                                  | 12  | Primary, secondary, and other outcomes, including the specific measurement variable (eg, systolic blood       | Pages 8–14 |
| 34 |                                                           |     | pressure), analysis metric (eg, change from baseline, final value, time to event), method of aggregation (eg, |            |
| 35 |                                                           |     | median, proportion), and time point for each outcome. Explanation of the clinical relevance of chosen         |            |
| 36 |                                                           |     | efficacy and harm outcomes is strongly recommended                                                            |            |
| 37 |                                                           |     |                                                                                                               |            |
| 38 | Participant timeline                                      | 13  | Time schedule of enrolment, interventions (including any run-ins and washouts), assessments, and visits for   | Figure 3   |
| 39 |                                                           |     | participants. A schematic diagram is highly recommended (see Figure)                                          |            |
| 40 |                                                           |     |                                                                                                               |            |
| 41 |                                                           |     |                                                                                                               |            |
| 42 |                                                           |     |                                                                                                               |            |
| 43 |                                                           |     |                                                                                                               |            |
| 44 |                                                           |     |                                                                                                               |            |
| 45 |                                                           |     |                                                                                                               |            |
| 46 |                                                           |     |                                                                                                               |            |

|    |                                                                     |     |                                                                                                                                                                                                                                                                                                                                                                                                              |                       |
|----|---------------------------------------------------------------------|-----|--------------------------------------------------------------------------------------------------------------------------------------------------------------------------------------------------------------------------------------------------------------------------------------------------------------------------------------------------------------------------------------------------------------|-----------------------|
| 1  | Sample size                                                         | 14  | Estimated number of participants needed to achieve study objectives and how it was determined, including clinical and statistical assumptions supporting any sample size calculations                                                                                                                                                                                                                        | Pages 14–15           |
| 2  |                                                                     |     |                                                                                                                                                                                                                                                                                                                                                                                                              |                       |
| 3  |                                                                     |     |                                                                                                                                                                                                                                                                                                                                                                                                              |                       |
| 4  | Recruitment                                                         | 15  | Strategies for achieving adequate participant enrolment to reach target sample size                                                                                                                                                                                                                                                                                                                          | Page 6                |
| 5  |                                                                     |     |                                                                                                                                                                                                                                                                                                                                                                                                              |                       |
| 6  |                                                                     |     |                                                                                                                                                                                                                                                                                                                                                                                                              |                       |
| 7  | <b>Methods: Assignment of interventions (for controlled trials)</b> |     |                                                                                                                                                                                                                                                                                                                                                                                                              |                       |
| 8  | Allocation:                                                         |     |                                                                                                                                                                                                                                                                                                                                                                                                              |                       |
| 9  |                                                                     |     |                                                                                                                                                                                                                                                                                                                                                                                                              |                       |
| 10 | Sequence                                                            | 16a | Method of generating the allocation sequence (eg, computer-generated random numbers), and list of any factors for stratification. To reduce predictability of a random sequence, details of any planned restriction (eg, blocking) should be provided in a separate document that is unavailable to those who enrol participants or assign interventions                                                     | Page 6                |
| 11 | generation                                                          |     |                                                                                                                                                                                                                                                                                                                                                                                                              |                       |
| 12 |                                                                     |     |                                                                                                                                                                                                                                                                                                                                                                                                              |                       |
| 13 |                                                                     |     |                                                                                                                                                                                                                                                                                                                                                                                                              |                       |
| 14 |                                                                     |     |                                                                                                                                                                                                                                                                                                                                                                                                              |                       |
| 15 |                                                                     |     |                                                                                                                                                                                                                                                                                                                                                                                                              |                       |
| 16 | Allocation                                                          | 16b | Mechanism of implementing the allocation sequence (eg, central telephone; sequentially numbered, opaque, sealed envelopes), describing any steps to conceal the sequence until interventions are assigned                                                                                                                                                                                                    | Page 6                |
| 17 | concealment                                                         |     |                                                                                                                                                                                                                                                                                                                                                                                                              |                       |
| 18 | mechanism                                                           |     |                                                                                                                                                                                                                                                                                                                                                                                                              |                       |
| 19 |                                                                     |     |                                                                                                                                                                                                                                                                                                                                                                                                              |                       |
| 20 | Implementation                                                      | 16c | Who will generate the allocation sequence, who will enrol participants, and who will assign participants to interventions                                                                                                                                                                                                                                                                                    | Page 6                |
| 21 |                                                                     |     |                                                                                                                                                                                                                                                                                                                                                                                                              |                       |
| 22 |                                                                     |     |                                                                                                                                                                                                                                                                                                                                                                                                              |                       |
| 23 |                                                                     |     |                                                                                                                                                                                                                                                                                                                                                                                                              |                       |
| 24 | Blinding (masking)                                                  | 17a | Who will be blinded after assignment to interventions (eg, trial participants, care providers, outcome assessors, data analysts), and how                                                                                                                                                                                                                                                                    | Page 6                |
| 25 |                                                                     |     |                                                                                                                                                                                                                                                                                                                                                                                                              |                       |
| 26 |                                                                     |     |                                                                                                                                                                                                                                                                                                                                                                                                              |                       |
| 27 |                                                                     | 17b | If blinded, circumstances under which unblinding is permissible, and procedure for revealing a participant's allocated intervention during the trial                                                                                                                                                                                                                                                         | Not applicable        |
| 28 |                                                                     |     |                                                                                                                                                                                                                                                                                                                                                                                                              |                       |
| 29 |                                                                     |     |                                                                                                                                                                                                                                                                                                                                                                                                              |                       |
| 30 |                                                                     |     |                                                                                                                                                                                                                                                                                                                                                                                                              |                       |
| 31 | <b>Methods: Data collection, management, and analysis</b>           |     |                                                                                                                                                                                                                                                                                                                                                                                                              |                       |
| 32 |                                                                     |     |                                                                                                                                                                                                                                                                                                                                                                                                              |                       |
| 33 | Data collection                                                     | 18a | Plans for assessment and collection of outcome, baseline, and other trial data, including any related processes to promote data quality (eg, duplicate measurements, training of assessors) and a description of study instruments (eg, questionnaires, laboratory tests) along with their reliability and validity, if known. Reference to where data collection forms can be found, if not in the protocol | Pages 8–14<br>Page 15 |
| 34 | methods                                                             |     |                                                                                                                                                                                                                                                                                                                                                                                                              |                       |
| 35 |                                                                     |     |                                                                                                                                                                                                                                                                                                                                                                                                              |                       |
| 36 |                                                                     |     |                                                                                                                                                                                                                                                                                                                                                                                                              |                       |
| 37 |                                                                     |     |                                                                                                                                                                                                                                                                                                                                                                                                              |                       |
| 38 |                                                                     |     |                                                                                                                                                                                                                                                                                                                                                                                                              |                       |
| 39 |                                                                     | 18b | Plans to promote participant retention and complete follow-up, including list of any outcome data to be collected for participants who discontinue or deviate from intervention protocols                                                                                                                                                                                                                    | Pages 7–8             |
| 40 |                                                                     |     |                                                                                                                                                                                                                                                                                                                                                                                                              |                       |
| 41 |                                                                     |     |                                                                                                                                                                                                                                                                                                                                                                                                              |                       |
| 42 |                                                                     |     |                                                                                                                                                                                                                                                                                                                                                                                                              |                       |

|    |                                 |     |                                                                                                                                                                                                                                                                                                                                       |                |
|----|---------------------------------|-----|---------------------------------------------------------------------------------------------------------------------------------------------------------------------------------------------------------------------------------------------------------------------------------------------------------------------------------------|----------------|
| 1  | Data management                 | 19  | Plans for data entry, coding, security, and storage, including any related processes to promote data quality (eg, double data entry; range checks for data values). Reference to where details of data management procedures can be found, if not in the protocol                                                                     | Page 15        |
| 2  |                                 |     |                                                                                                                                                                                                                                                                                                                                       |                |
| 3  |                                 |     |                                                                                                                                                                                                                                                                                                                                       |                |
| 4  |                                 |     |                                                                                                                                                                                                                                                                                                                                       |                |
| 5  | Statistical methods             | 20a | Statistical methods for analysing primary and secondary outcomes. Reference to where other details of the statistical analysis plan can be found, if not in the protocol                                                                                                                                                              | Page 15        |
| 6  |                                 |     |                                                                                                                                                                                                                                                                                                                                       |                |
| 7  |                                 |     |                                                                                                                                                                                                                                                                                                                                       |                |
| 8  |                                 | 20b | Methods for any additional analyses (eg, subgroup and adjusted analyses)                                                                                                                                                                                                                                                              | Pages 15–16    |
| 9  |                                 |     |                                                                                                                                                                                                                                                                                                                                       |                |
| 10 |                                 | 20c | Definition of analysis population relating to protocol non-adherence (eg, as randomised analysis), and any statistical methods to handle missing data (eg, multiple imputation)                                                                                                                                                       | Pages 15–16    |
| 11 |                                 |     |                                                                                                                                                                                                                                                                                                                                       |                |
| 12 |                                 |     |                                                                                                                                                                                                                                                                                                                                       |                |
| 13 |                                 |     |                                                                                                                                                                                                                                                                                                                                       |                |
| 14 | <b>Methods: Monitoring</b>      |     |                                                                                                                                                                                                                                                                                                                                       |                |
| 15 |                                 |     |                                                                                                                                                                                                                                                                                                                                       |                |
| 16 | Data monitoring                 | 21a | Composition of data monitoring committee (DMC); summary of its role and reporting structure; statement of whether it is independent from the sponsor and competing interests; and reference to where further details about its charter can be found, if not in the protocol. Alternatively, an explanation of why a DMC is not needed | Not applicable |
| 17 |                                 |     |                                                                                                                                                                                                                                                                                                                                       |                |
| 18 |                                 |     |                                                                                                                                                                                                                                                                                                                                       |                |
| 19 |                                 |     |                                                                                                                                                                                                                                                                                                                                       |                |
| 20 |                                 |     |                                                                                                                                                                                                                                                                                                                                       |                |
| 21 |                                 |     |                                                                                                                                                                                                                                                                                                                                       |                |
| 22 |                                 | 21b | Description of any interim analyses and stopping guidelines, including who will have access to these interim results and make the final decision to terminate the trial                                                                                                                                                               | Not applicable |
| 23 |                                 |     |                                                                                                                                                                                                                                                                                                                                       |                |
| 24 |                                 |     |                                                                                                                                                                                                                                                                                                                                       |                |
| 25 | Harms                           | 22  | Plans for collecting, assessing, reporting, and managing solicited and spontaneously reported adverse events and other unintended effects of trial interventions or trial conduct                                                                                                                                                     | Page 14        |
| 26 |                                 |     |                                                                                                                                                                                                                                                                                                                                       |                |
| 27 |                                 |     |                                                                                                                                                                                                                                                                                                                                       |                |
| 28 | Auditing                        | 23  | Frequency and procedures for auditing trial conduct, if any, and whether the process will be independent from investigators and the sponsor                                                                                                                                                                                           | Not applicable |
| 29 |                                 |     |                                                                                                                                                                                                                                                                                                                                       |                |
| 30 |                                 |     |                                                                                                                                                                                                                                                                                                                                       |                |
| 31 |                                 |     |                                                                                                                                                                                                                                                                                                                                       |                |
| 32 | <b>Ethics and dissemination</b> |     |                                                                                                                                                                                                                                                                                                                                       |                |
| 33 |                                 |     |                                                                                                                                                                                                                                                                                                                                       |                |
| 34 | Research ethics approval        | 24  | Plans for seeking research ethics committee/institutional review board (REC/IRB) approval                                                                                                                                                                                                                                             | Page 5         |
| 35 |                                 |     |                                                                                                                                                                                                                                                                                                                                       |                |
| 36 |                                 |     |                                                                                                                                                                                                                                                                                                                                       |                |
| 37 | Protocol amendments             | 25  | Plans for communicating important protocol modifications (eg, changes to eligibility criteria, outcomes, analyses) to relevant parties (eg, investigators, REC/IRBs, trial participants, trial registries, journals, regulators)                                                                                                      | Page 5         |
| 38 |                                 |     |                                                                                                                                                                                                                                                                                                                                       |                |
| 39 |                                 |     |                                                                                                                                                                                                                                                                                                                                       |                |
| 40 |                                 |     |                                                                                                                                                                                                                                                                                                                                       |                |
| 41 |                                 |     |                                                                                                                                                                                                                                                                                                                                       |                |
| 42 |                                 |     |                                                                                                                                                                                                                                                                                                                                       |                |
| 43 |                                 |     |                                                                                                                                                                                                                                                                                                                                       |                |
| 44 |                                 |     |                                                                                                                                                                                                                                                                                                                                       |                |
| 45 |                                 |     |                                                                                                                                                                                                                                                                                                                                       |                |
| 46 |                                 |     |                                                                                                                                                                                                                                                                                                                                       |                |

|    |                               |     |                                                                                                                                                                                                                                                                                     |                |
|----|-------------------------------|-----|-------------------------------------------------------------------------------------------------------------------------------------------------------------------------------------------------------------------------------------------------------------------------------------|----------------|
| 1  | Consent or assent             | 26a | Who will obtain informed consent or assent from potential trial participants or authorised surrogates, and how (see Item 32)                                                                                                                                                        | Page 6         |
| 2  |                               |     |                                                                                                                                                                                                                                                                                     |                |
| 3  |                               |     |                                                                                                                                                                                                                                                                                     |                |
| 4  |                               | 26b | Additional consent provisions for collection and use of participant data and biological specimens in ancillary studies, if applicable                                                                                                                                               | Not applicable |
| 5  |                               |     |                                                                                                                                                                                                                                                                                     |                |
| 6  |                               |     |                                                                                                                                                                                                                                                                                     |                |
| 7  | Confidentiality               | 27  | How personal information about potential and enrolled participants will be collected, shared, and maintained in order to protect confidentiality before, during, and after the trial                                                                                                | Page 6         |
| 8  |                               |     |                                                                                                                                                                                                                                                                                     |                |
| 9  |                               |     |                                                                                                                                                                                                                                                                                     |                |
| 10 | Declaration of interests      | 28  | Financial and other competing interests for principal investigators for the overall trial and each study site                                                                                                                                                                       | Page 18        |
| 11 |                               |     |                                                                                                                                                                                                                                                                                     |                |
| 12 |                               |     |                                                                                                                                                                                                                                                                                     |                |
| 13 | Access to data                | 29  | Statement of who will have access to the final trial dataset, and disclosure of contractual agreements that limit such access for investigators                                                                                                                                     | Page 18        |
| 14 |                               |     |                                                                                                                                                                                                                                                                                     |                |
| 15 |                               |     |                                                                                                                                                                                                                                                                                     |                |
| 16 | Ancillary and post-trial care | 30  | Provisions, if any, for ancillary and post-trial care, and for compensation to those who suffer harm from trial participation                                                                                                                                                       | Page 6         |
| 17 |                               |     |                                                                                                                                                                                                                                                                                     |                |
| 18 |                               |     |                                                                                                                                                                                                                                                                                     |                |
| 19 |                               |     |                                                                                                                                                                                                                                                                                     |                |
| 20 | Dissemination policy          | 31a | Plans for investigators and sponsor to communicate trial results to participants, healthcare professionals, the public, and other relevant groups (eg, via publication, reporting in results databases, or other data sharing arrangements), including any publication restrictions | Page 16        |
| 21 |                               |     |                                                                                                                                                                                                                                                                                     |                |
| 22 |                               |     |                                                                                                                                                                                                                                                                                     |                |
| 23 |                               |     |                                                                                                                                                                                                                                                                                     |                |
| 24 |                               | 31b | Authorship eligibility guidelines and any intended use of professional writers                                                                                                                                                                                                      | Not applicable |
| 25 |                               |     |                                                                                                                                                                                                                                                                                     |                |
| 26 |                               | 31c | Plans, if any, for granting public access to the full protocol, participant-level dataset, and statistical code                                                                                                                                                                     | Not applicable |
| 27 |                               |     |                                                                                                                                                                                                                                                                                     |                |
| 28 |                               |     |                                                                                                                                                                                                                                                                                     |                |
| 29 | <b>Appendices</b>             |     |                                                                                                                                                                                                                                                                                     |                |
| 30 |                               |     |                                                                                                                                                                                                                                                                                     |                |
| 31 | Informed consent materials    | 32  | Model consent form and other related documentation given to participants and authorised surrogates                                                                                                                                                                                  | Not applicable |
| 32 |                               |     |                                                                                                                                                                                                                                                                                     |                |
| 33 |                               |     |                                                                                                                                                                                                                                                                                     |                |
| 34 | Biological specimens          | 33  | Plans for collection, laboratory evaluation, and storage of biological specimens for genetic or molecular analysis in the current trial and for future use in ancillary studies, if applicable                                                                                      | Not applicable |
| 35 |                               |     |                                                                                                                                                                                                                                                                                     |                |
| 36 |                               |     |                                                                                                                                                                                                                                                                                     |                |

\*It is strongly recommended that this checklist be read in conjunction with the SPIRIT 2013 Explanation & Elaboration for important clarification on the items. Amendments to the protocol should be tracked and dated. The SPIRIT checklist is copyrighted by the SPIRIT Group under the Creative Commons [“Attribution-NonCommercial-NoDerivs 3.0 Unported”](https://creativecommons.org/licenses/by-nc-nd/3.0/) license.



Supplementary Table 1. Radio-Taiso part 1 (3 min 10 sec)

|    | Movement                                                | Purpose                                                                                                                                                                                |
|----|---------------------------------------------------------|----------------------------------------------------------------------------------------------------------------------------------------------------------------------------------------|
| 1  | Stretch entire body                                     | Raising the arms and stretching the entire body helps to achieve better posture                                                                                                        |
| 2  | Swing the arms and bend the legs                        | Swinging the arms to the sides while bending and stretching the legs helps to stimulate blood circulation throughout the body                                                          |
| 3  | Arm rotations                                           | Rotating the arms in large circles helps to keep the shoulder joint flexible.                                                                                                          |
| 4  | Chest stretches                                         | Opening up the chest helps to correct posture and promote respiratory function.                                                                                                        |
| 5  | Bends to each side                                      | Bending the upper body to the side helps to maintain the flexibility of the spine to make lateral movements.                                                                           |
| 6  | Backward and forward bends                              | Stretching the back and abdomen helps to maintain the flexibility of the spine to make forward and backward movements.                                                                 |
| 7  | Body twists                                             | Twisting the body helps to stretch the muscles around the hips and maintain the flexibility of the spine to make rotational movements.                                                 |
| 8  | Stretch the arms up and down                            | Stretching the arms up and down quickly and powerfully helps to develop strength and instantaneous power.                                                                              |
| 9  | Bend the body downwards at an angle and chest stretches | Bending the body downwards helps to develop muscle flexibility from the back to the back of the legs. By opening the chest, posture is corrected and respiratory function is improved. |
| 10 | Whole-body rotation                                     | Rotating the upper body in a large circle helps to increase the flexibility of the entire spine, especially its lower back portion.                                                    |
| 11 | Jumps                                                   | Making rhythmic jumps helps to promote blood circulation throughout the body and increase leg strength.                                                                                |
| 12 | Swing the arms and bend the legs                        | Swinging the arms to the side and bending and stretching the legs together while being aware of                                                                                        |

breathing helps the person take time to organise their body, mind, and breath.

13 Deep breath

Breathing deeply while moving the arms widely helps bring the body back to a normal state.

---

URL: [https://www.youtube.com/watch?v=\\_YZZfaMGEOU](https://www.youtube.com/watch?v=_YZZfaMGEOU)

For peer review only

Supplementary Table 2. Radio-Taiso part 2 (3 min 5 sec)

|    | Movement                                              | Purpose                                                                                                                                                 |
|----|-------------------------------------------------------|---------------------------------------------------------------------------------------------------------------------------------------------------------|
| 1  | Shake the whole body                                  | Making light jumps helps to shake and relax the whole body and prepare it for the exercises.                                                            |
| 2  | Bend and stretch the arms and legs                    | Vigorously bending and stretching the arms and legs helps to promote blood circulation throughout the body.                                             |
| 3  | Open arms from the front and rotate                   | Opening and rotating of the arms helps to relax the muscles around the shoulder and increase the range of motion of the shoulder joint.                 |
| 4  | Chest stretches                                       | Opening up the chest helps to correct posture and promote respiratory function.                                                                         |
| 5  | Bends to each side                                    | Bending the upper body to the side helps to maintain the flexibility of the spine to make lateral movements.                                            |
| 6  | Backward and forward bends                            | Stretching the back and abdomen helps to maintain the flexibility of the spine to make forward and backward movements.                                  |
| 7  | Body twists                                           | Twisting the body helps to stretch the muscles around the hips and maintain the flexibility of the spine to make rotational movements.                  |
| 8  | One-legged jump and step exercise                     | Making jumps and steps with just one leg helps to increase muscle strength, instantaneous power in the legs, and blood circulation throughout the body. |
| 9  | Bend backwards with twist and bend downwards at angle | Twisting and bending the whole body helps to stretch the muscles of the torso and chest and increase flexibility.                                       |
| 10 | Tilt the body forward                                 | Moving the upper body up and down while leaning forward helps to strengthen the muscles of the back and achieve better posture.                         |
| 11 | Jumps                                                 | Making rhythmic jumps helps to promote blood circulation throughout the body and increase leg                                                           |

1  
2  
3  
4  
5 strength.

6 12 Swing the arms and bend the legs

Swinging the arms and bending the legs together while being aware of breathing helps the person  
7 to take some time to organise the body, mind, and breath.

8  
9 13 Deep breath

Breathing deeply while moving your arms widely helps to bring the body back to a normal state.

---

10  
11 URL: <https://www.youtube.com/watch?v=yi1TbzML2cU>

12  
13  
14  
15  
16  
17  
18  
19  
20  
21  
22  
23  
24  
25  
26  
27  
28  
29  
30  
31  
32  
33  
34  
35  
36  
37  
38  
39  
40  
41  
42  
43  
44  
45  
46

For peer review only

Supplementary Table 3. Minna no Taiso (4 min 30 sec)

| Movement                   | Purpose                                                                                                                                                                        |
|----------------------------|--------------------------------------------------------------------------------------------------------------------------------------------------------------------------------|
| 1 Hands and arms exercises | Moving the hands and arms well promotes peripheral blood circulation and the development of a sense of movement.                                                               |
| 2 Chest exercise           | Making chest movements helps to correct posture and improve respiratory function.                                                                                              |
| 3 Upper body bounce        | Bouncing the entire body while bending the upper body helps to relax the whole body, promote blood circulation, and maintain chest flexibility.                                |
| 4 Neck exercises           | Moving and stretching the neck helps to stretch the muscles from the neck to the shoulders and stimulate blood circulation in these areas.                                     |
| 5 Moving quickly           | Quickly extending the arm while shifting the body weight helps to increase the instantaneous power of the whole body.                                                          |
| 6 Leg and hip exercises    | Moving the legs and hip helps to strengthen the muscles of these parts, increase hip flexibility, and a sense of balance.                                                      |
| 7 Arm and leg exercises    | Making movements with the arms and legs that lead the person to try to make the arm movements match the movements of the whole body helps to develop coordination of movement. |
| 8 Deep breath              | Breathing deeply while moving your arms widely helps to bring the body back to a normal state.                                                                                 |

URL: <https://www.youtube.com/watch?v=1MGsuinREIk>

# BMJ Open

## Effects of a home-based Radio-Taiso exercise programme on health-related quality of life in older adults with frailty: protocol for an assessor-blind randomised controlled trial

|                                 |                                                                                                                                                                                                                                                                                                                                                                                                                                                                                                                                                                                                                                                                                                                                                                                                                                                                                                                                                                                                                                                                                                                                                                                                                                                                                                       |
|---------------------------------|-------------------------------------------------------------------------------------------------------------------------------------------------------------------------------------------------------------------------------------------------------------------------------------------------------------------------------------------------------------------------------------------------------------------------------------------------------------------------------------------------------------------------------------------------------------------------------------------------------------------------------------------------------------------------------------------------------------------------------------------------------------------------------------------------------------------------------------------------------------------------------------------------------------------------------------------------------------------------------------------------------------------------------------------------------------------------------------------------------------------------------------------------------------------------------------------------------------------------------------------------------------------------------------------------------|
| Journal:                        | <i>BMJ Open</i>                                                                                                                                                                                                                                                                                                                                                                                                                                                                                                                                                                                                                                                                                                                                                                                                                                                                                                                                                                                                                                                                                                                                                                                                                                                                                       |
| Manuscript ID                   | bmjopen-2022-063201.R1                                                                                                                                                                                                                                                                                                                                                                                                                                                                                                                                                                                                                                                                                                                                                                                                                                                                                                                                                                                                                                                                                                                                                                                                                                                                                |
| Article Type:                   | Protocol                                                                                                                                                                                                                                                                                                                                                                                                                                                                                                                                                                                                                                                                                                                                                                                                                                                                                                                                                                                                                                                                                                                                                                                                                                                                                              |
| Date Submitted by the Author:   | 23-Aug-2022                                                                                                                                                                                                                                                                                                                                                                                                                                                                                                                                                                                                                                                                                                                                                                                                                                                                                                                                                                                                                                                                                                                                                                                                                                                                                           |
| Complete List of Authors:       | Osuka, Yosuke; Tokyo Metropolitan Institute of Gerontology, Research Team for Promoting Independence and Mental Health<br>Kojima, Narumi; Tokyo Metropolitan Institute of Gerontology, Research Team for Promoting Independence and Mental Health<br>Sugie, Masamitsu; Tokyo Metropolitan Geriatric Hospital and Institute of Gerontology, Department of Cardiology<br>Omura, Takuya; Tokyo Metropolitan Institute of Gerontology, Department of Geriatric Medicine<br>Motokawa, Keiko; Tokyo Metropolitan Institute of Gerontology, Research Team for Promoting Independence and Mental Health<br>Ueda, Takuya; Tokyo Metropolitan Institute of Gerontology, The Tokyo Metropolitan Support Center for Preventative Long-term and Frail Elderly Care<br>Maruo, Kazushi; University of Tsukuba, Department of Biostatistics, Faculty of Medicine<br>Ono, Risa; Japan Radio-Taiso Federation<br>Aoyama, Toshihiko; Japan Radio-Taiso Federation<br>Inoue, Shigeru; Tokyo Medical University, Department of Preventive Medicine and Public Health<br>Kim, Hunkyung; Tokyo Metropolitan Institute of Gerontology, Research Team for Promoting Independence and Mental Health<br>Sasai, Hiroyuki; Tokyo Metropolitan Institute of Gerontology, Research Team for Promoting Independence and Mental Health |
| <b>Primary Subject Heading</b>: | Public health                                                                                                                                                                                                                                                                                                                                                                                                                                                                                                                                                                                                                                                                                                                                                                                                                                                                                                                                                                                                                                                                                                                                                                                                                                                                                         |
| Secondary Subject Heading:      | Geriatric medicine, Mental health, Sports and exercise medicine                                                                                                                                                                                                                                                                                                                                                                                                                                                                                                                                                                                                                                                                                                                                                                                                                                                                                                                                                                                                                                                                                                                                                                                                                                       |
| Keywords:                       | GERIATRIC MEDICINE, MENTAL HEALTH, PUBLIC HEALTH, SPORTS MEDICINE                                                                                                                                                                                                                                                                                                                                                                                                                                                                                                                                                                                                                                                                                                                                                                                                                                                                                                                                                                                                                                                                                                                                                                                                                                     |
|                                 |                                                                                                                                                                                                                                                                                                                                                                                                                                                                                                                                                                                                                                                                                                                                                                                                                                                                                                                                                                                                                                                                                                                                                                                                                                                                                                       |

SCHOLARONE™  
Manuscripts

1  
2  
3  
4  
5  
6 **1 Effects of a home-based Radio-Taiso exercise programme on health-related quality**  
7 **2 of life in older adults with frailty: protocol for an assessor-blind randomised**  
8 **3 controlled trial**  
9  
10

11 5 Yosuke Osuka<sup>1</sup>, PhD; Narumi Kojima, MS<sup>1</sup>; Masamitsu Sugie<sup>2</sup>, MD, PhD; Takuya  
12 6 Omura<sup>3</sup>, MD, PhD; Keiko Motokawa<sup>1</sup>, PhD; Takuya Ueda<sup>4</sup>, PhD; Kazushi Maruo<sup>5</sup>, PhD;  
13 7 Risa Ono<sup>6</sup>, MS; Toshihiko Aoyama<sup>6</sup>; Shigeru Inoue<sup>7</sup>, MD, PhD; Hunkyung Kim<sup>1</sup>, PhD;  
14 8 and Hiroyuki Sasai<sup>1</sup>, PhD  
15  
16  
17  
18

19 10 <sup>1</sup>Research Team for Promoting Independence and Mental Health, Tokyo Metropolitan  
20 11 Institute of Gerontology, Tokyo, Japan  
21

22 12 <sup>2</sup>Department of Cardiology, Tokyo Metropolitan Geriatric Hospital and Institute of  
23 13 Gerontology, Tokyo, Japan  
24

25 14 <sup>3</sup>Department of Geriatric Medicine, Tokyo Metropolitan Institute of Gerontology, Tokyo,  
26 15 Japan  
27

28 16 <sup>4</sup>The Tokyo Metropolitan Support Center for Preventative Long-term and Frail Elderly  
29 17 Care, Tokyo Metropolitan Institute of Gerontology, Tokyo, Japan  
30

31 18 <sup>5</sup>Department of Biostatistics, Faculty of Medicine, University of Tsukuba, Tsukuba,  
32 19 Japan  
33

34 20 <sup>6</sup>Japan Radio-Taiso Federation, Tokyo, Japan  
35

36 21 <sup>7</sup>Department of Preventive Medicine and Public Health, Tokyo Medical University,  
37 22 Tokyo, Japan  
38  
39

40 24 **Corresponding author**

41 25 Yosuke Osuka, PhD

42 26 Research Team for Promoting Independence and Mental Health,

43 27 Tokyo Metropolitan Institute of Gerontology

44 28 35-2 Sakae-cho, Itabashi-ku, Tokyo 173-0015, Japan.

45 29 Phone: +81-3-3964-3241; Email: osuka@tmig.or.jp  
46  
47  
48  
49

50 31 **Word count**

51 32 5111/4000 words  
52  
53  
54  
55  
56  
57  
58  
59  
60

## 1 **ABSTRACT**

### 2 **Introduction**

3 Few clinical trials have examined the effects of home-based exercise programmes on  
4 health-related quality of life (HR-QoL) in older adults with frailty. Radio-Taiso is the  
5 most famous exercise programme in Japan. A home-based Radio-Taiso exercise  
6 programme may serve as an accessible, scalable, and sustainable care intervention for  
7 older adults with frailty. The primary aims of this trial is to test whether older adults with  
8 frailty who are prescribed our home-based Radio-Taiso exercise programme will receive  
9 greater benefits for HR-QoL compared to those who are not prescribed the exercise  
10 programme. Potential mechanisms underlying the effectiveness of the programme and  
11 the effects of the programme on daily lifestyle will be also investigated.

### 12 **Methods and analysis**

13 This assessor-blind randomised controlled trial will be conducted at the Tokyo  
14 Metropolitan Institute of Gerontology (TMIG) in Itabashi-ku, Tokyo, Japan. From April  
15 to May 2022, 226 older adults with pre-frailty or frailty according to the revised Japanese  
16 version of the Cardiovascular Health Study criteria will be included from a large database.  
17 After a baseline assessment in June 2022, participants will be randomly assigned to the  
18 intervention (home-based Radio-Taiso exercise and nutrition programme) or control  
19 groups (nutrition programme) at a 1:1 ratio. After intervention completion, a follow-up  
20 assessment will be conducted in September 2022. The primary outcome is the change in  
21 the mental domain of HR-QoL assessed using SF-36<sup>®</sup>. Secondary outcomes include  
22 physical and role/social domains and subscales of HR-QoL, frailty phenotype, physical  
23 fitness, posture, cognition, exercise self-efficacy, depressive symptoms, brain-derived  
24 neurotrophic factor, social network, habitual energy intake, physical activity, and sleep  
25 conditions.

### 26 **Ethics and dissemination**

27 The Research Ethics Committee of TMIG has approved the research protocol. This trial  
28 will be conducted in accordance with the principles of the Declaration of Helsinki. The  
29 findings will be presented at international academic conferences and published in peer-  
30 reviewed international journals.

### 31 **Trial registration**

32 Registry name: UMIN-CTR

33 URL: [https://center6.umin.ac.jp/cgi-open-bin/ctr\\_e/ctr\\_view.cgi?recptno=R000053863](https://center6.umin.ac.jp/cgi-open-bin/ctr_e/ctr_view.cgi?recptno=R000053863)

### 34 **Protocol version**

35 Date: 9 May 2022

36 Version identifier: 4.4



1  
2  
3  
4  
5  
6  
7  
8  
9  
10  
11  
12  
13  
14  
15  
16  
17  
18  
19  
20  
21  
22  
23  
24  
25  
26  
27  
28  
29  
30  
31  
32  
33  
34  
35  
36  
37  
38  
39  
40  
41  
42  
43  
44  
45  
46  
47  
48  
49  
50  
51  
52  
53  
54  
55  
56  
57  
58  
59  
60

1  
2  
3  
4  
5  
6  
7  
8  
9  
10  
11  
12  
13  
14  
15  
16  
17  
18  
19  
20  
21  
22  
23  
24  
25  
26  
27  
28  
29  
30  
31  
32  
33  
34  
35  
36  
37  
38  
39  
40  
41  
42  
43  
44  
45  
46  
47  
48  
49  
50  
51  
52  
53  
54  
55  
56  
57  
58  
59  
60

## Strengths and Limitations

- The feasibility of this Phase III trial has been enhanced based on the processes, resources, management, and scientific data of a pilot trial.
- The trial will include older adults with frailty defined using a validated assessment tool.
- Random allocation, blinding of assessors and analysts, interpretation of results based on the intention-to-treat principle, and disclosure of protocol papers will reduce the risk of selection, measurement, reduction, and reporting bias.
- The non-blinding of allocation information to participants and care providers may increase the risk of performance bias.
- The generalisability of the study findings to non-Japanese populations is unclear.

## 1 INTRODUCTION

2 Frailty is defined as vulnerability of homeostatic responses to stressors due to  
3 cumulative age-related decline of physiological systems.[1] Research suggests that 7%  
4 and 47% of older adults have frailty and pre-frailty, respectively, and their risk of falls,  
5 disabilities, nursing home admission, and death is significantly higher than that of robust  
6 older adults.[2] Interventions to reduce frailty prevalence and severity may benefit older  
7 adults with care needs, their caregivers, and the public social insurance system. However,  
8 clinical trials involving older adults with frailty defined using validated assessment tools  
9 are required to confirm the effectiveness of these interventions.[1]

10 Interventions such as exercise and nutritional programmes are useful for reducing  
11 the prevalence of frailty, but stakeholders have raised concerns that research on these  
12 interventions has focused predominantly on improving physical outcomes.[3] Studies  
13 focusing on patient-reported outcomes (e.g. health-related quality of life [HR-QoL]) may  
14 address the gaps between scientific evidence and clinical practice.[4] Exercise  
15 interventions are reportedly the most effective for improving HR-QoL among older adults  
16 with frailty, but this warrants validation in robust clinical trials.[5] Nevertheless, evidence  
17 for the effects of home-based exercise interventions on HR-QoL remains scarce.[6] As  
18 older adults with frailty exhibit decreased mobility,[7] readily available home-based  
19 exercise programmes are feasible and rational interventions.

20 Radio-Taiso is the most famous Japanese exercise programme, with reports  
21 suggesting that approximately 96.9% of the national population are aware of the  
22 programme.[8] In 1928, the Postal Life Insurance Bureau of the Ministry of  
23 Communications (successor agency: Japan Post Insurance Co., Ltd.) developed Radio-  
24 Taiso as a “National Health Exercise” to improve health among Japanese people.[9]  
25 Radio-Taiso is customarily practiced in numerous settings and is firmly established in  
26 Japanese culture (Figure 1).[10] It is broadcasted daily by the Japan Broadcasting  
27 Corporation via public radio and television, thus facilitating home access by Japanese  
28 older adults with frailty.

29 Our recent pilot randomised controlled trial examined the feasibility and potential  
30 effectiveness of a home-based Radio-Taiso exercise programme in community-dwelling  
31 older adults with pre-frailty and frailty. Participants demonstrated high adherence and the  
32 results suggested that the programme may lead to clinically important improvements in  
33 the mental domain of HR-QoL (under review). However, the effectiveness of the  
34 programme remains to be validated by robust clinical trials.

35 This trial aims to test whether older adults with pre-frailty and frailty who undergo  
36 the programme will experience greater benefits in the mental domain of HR-QoL

1 compared to those who do not undergo the programme. Further, the trial aims to identify  
2 the mechanisms underlying programme effectiveness and the impact of the programme  
3 on participants' lifestyles (Figure 2).

## 4 **METHODS AND ANALYSIS**

### 5 **Study design, setting, and procedures**

6 This is a 12-week randomised, assessor-blind, parallel-design, two-arm, phase III  
7 trial. The protocol was designed in accordance with the SPIRIT statement  
8 (Supplementary Material 1) and several aspects of the SPIRIT-PRO Extension.

9 All outcomes will be assessed at the Tokyo Metropolitan Institute of Gerontology  
10 (TMIG) in Itabashi-ku, Tokyo, Japan. Participants will practice the programme at home.  
11 Six face-to-face group sessions will be conducted at the TMIG or nearby community  
12 facilities (Figure 3). Recruitment will be conducted in April 2022. Informed consent will  
13 be obtained in the subsequent month (May 2022). Baseline and follow-up assessments  
14 will be conducted in June and September 2022, respectively. After baseline assessments,  
15 participants who meet the eligibility criteria will be included in the trial and randomly  
16 assigned to the intervention (home-based Radio-Taiso exercise programme + nutrition  
17 programme) or control (nutrition programme) groups. The intervention will begin and  
18 end in June and September 2022, respectively.

### 19 **Participants**

20 Inclusion criteria are: 1) aged 65 years or older; and 2) frailty or pre-frailty as  
21 defined by the revised Japanese version of the Cardiovascular Health Study (J-CHS)  
22 criteria (see below).

23 Exclusion criteria are: 1) inability to participate in both baseline and follow-up  
24 assessments; 2) diagnosed with dementia or prescribed anti-dementia drugs; 3) self-  
25 reports of being unable to eat, excrete, dress, move, or bathe independently; 4) not  
26 allowed to exercise (except for light-intensity exercise) by the family physician; 5)  
27 unstable/severe medical conditions that prevent trial physicians from permitting study  
28 participation; 6) history of angina pectoris, myocardial infarction, or cardiac surgery in  
29 the past 3 months, having a terminal illness, or receiving palliative care; 7) practising  
30 Radio-Taiso exercises for  $\geq 1$  day/week for the past month; 8) participating in a specific  
31 rehabilitation programme; 9) unable to walk  $\geq 10$  m independently; 10) participating or  
32 will participate in other clinical trials; 11) lacking a television at home; 12) difficulty  
33 communicating in Japanese; 13) evaluated by the principal investigator and/or trial  
34 physicians to be ineligible; and 14) unable to provide consent to participate.

Potential participants will be recruited from a large database of trial-ready cohorts managed by the TMIG. In our pilot trial in 2020, 902 individuals were newly enrolled or had their information updated. Of these, 514 (60%) met the pre-frailty or frailty criteria and 186 (recruitment rate: 20.6%) met all eligibility criteria and were willing to participate. Thus, at least 1,097 new registrations or updates are required to ensure that the target number of 226 participants is reached (described in more detail in the sample size section).

Invitation letters and eligibility criteria checklist will be sent to individuals diagnosed with frailty or pre-frailty between October 2021 and March 2022. Participants who meet all eligibility criteria and intend to participate will be provided a detailed verbal explanation of the study (i.e. aims, procedures, confidentiality, possible benefits and disadvantages, anticipated risks, and methods to address risks). Only individuals who provide written informed consent will participate. If there are more individuals willing to participate than the target sample size, participants will be randomly selected using a computer-generated random sequence. During baseline assessments, trial physicians will assess compliance with exclusion criteria numbered 2, 5, and 6.

### **Allocation and blinding**

After baseline assessments, participants will be randomly allocated to the intervention and control groups at a 1:1 ratio. The sequence for generating the allocation code will be stratified by sex (male or female), age (<75 or ≥75 years), and frailty severity (pre-frail or frailty). Blocking will be applied.

The principal investigator (YO) at the TMIG will send identification codes of eligible participants to an allocator (KM) who has no contact with participants. KM will combine the codes with a prescribed randomisation code, which will be generated prior to baseline assessments. An independent research staff member will inform participants of their group based on the allocation code sent by KM. Group labels will not be disclosed to the assessor and statistical analyst until completion of the primary analysis.

### **Intervention**

During the 12-week intervention period, participants will be instructed to avoid starting new exercise or nutrition programmes. To address the ethical disadvantages of the control group, a nutrition programme will be provided to both groups.

#### **Home-based Radio-Taiso exercise programme**

Radio-Taiso includes three exercise patterns: Radio-Taiso No. 1 and 2 and Minna

1 no Taiso. These patterns comprise 8–13 rhythmic whole-body movements with music.  
2 Each pattern starts with a low-intensity movement, gradually increases in intensity, and  
3 ends with another low-intensity movement, allowing safe practice. The smooth execution  
4 of movements requires fitness in various physical domains (strength, flexibility,  
5 endurance, and balance), making Radio-Taiso a multi-component exercise programme  
6 (details in Supplementary Tables 1–3).

7 The home-based programme comprises six 60-min face-to-face group sessions  
8 with a certified instructor from the Japan Radio-Taiso Federation and daily practice in  
9 participants' homes. Before the programme, the intervention group will receive a face-to-  
10 face group session on correctly performing the three exercise patterns. In the first 4 weeks  
11 of the intervention, participants will receive face-to-face group sessions on effectively  
12 performing the exercise programmes. In week 8, a face-to-face group session will be  
13 provided to review the key points of each exercise programme.

14 Participants will be instructed to complete a three-pattern exercise programme  
15 once daily at home by themselves via a broadcast by the Japan Broadcasting Corporation  
16 or DVD. If the participants feel unwell while performing any exercise or feel that the  
17 exercise intensity is too high, they will be instructed to stop or reduce the number of  
18 sessions. Participants will be required to record whether (1) they performed the exercise  
19 programme and (2) compliance with key points for effective programme implementation  
20 in an exercise diary. On the day of face-to-face group sessions, research staff will check  
21 the exercise diary, adverse events, and participation in the new rehabilitation programme.  
22 In weeks when sessions are not provided, these details will be checked by telephone every  
23 fortnight.

24 The pilot trial confirmed good adherence to the home-based Radio-Taiso exercise  
25 programme (retention rate: 100%; median [interquartile range] practice rate: 97.6 [88.1–  
26 98.8] %). However, no trend towards improvements in physical outcomes was observed.  
27 Radio-Taiso may not include properties that significantly improve physical outcomes  
28 because it predominately consists of flexibility exercises. However, thoroughly  
29 completing the purpose of each movement in Radio-Taiso necessitates quicker and larger  
30 movements, which require muscle endurance and whole-body endurance. In this regard,  
31 several participants who received face-to-face instructions in the pilot study reported that  
32 it is important to understand the purpose of each movement of the Radio-Taiso via face-  
33 to-face instructions to improve the quality of practice at home. Thus, to provide  
34 participants with a programme that yields better physical outcomes, the number of face-  
35 to-face sessions will be increased from three to six and include processes that help  
36 participants familiarise with the key points of the programme. An item will be added to

1 the exercise diary to check compliance with these points.

### 2 3 Nutrition programme

4 The nutrition programme comprises: 1) distribution of a nutrition leaflet; 2)  
5 recording of a dietary variety score; and 3) telephone nutrition counselling. One week  
6 before intervention onset, participants will receive a face-to-face briefing from a dietitian  
7 on programme implementation. A nutrition leaflet will be distributed once weekly during  
8 the first 4 weeks of the intervention, detailing the nutritional role and recommended intake  
9 amounts of protein, calcium, vitamins/minerals, and carbohydrates/fats, alongside  
10 specific recipes for the efficient intake of these nutrients. Participants will be instructed  
11 to record daily in a nutrition diary the consumption of 10 food groups (meat, seafood,  
12 eggs, soya and soya products, milk, green and yellow vegetables, seaweed, potatoes, fruit,  
13 and oil) using a dietary variety score. Participants will be requested to provide scores on  
14 intake of these food groups on a 10-point scale.[11] A high dietary variety score has been  
15 associated with lower frailty severity.[12] Participants will be allowed to call the dietitian  
16 1 day per week to discuss how to proceed with the nutrition programme or if they have  
17 any questions.

### 18 19 **Outcome measures**

20 The primary outcome is changes in the mental component summary (MCS) score  
21 of HR-QoL. Secondary outcomes are the physical component summary (PCS) score,  
22 role/social component summary (RCS) score, and eight subscales of HR-QoL as well as  
23 frailty phenotype, physical fitness, posture, cognition, exercise self-efficacy, depressive  
24 symptoms, brain-derived neurotrophic factor (BDNF), social network, habitual energy  
25 intake, physical activity, and sleep conditions. All outcomes excluding habitual physical  
26 activity will be assessed at a baseline survey within 2 weeks prior to the start of the  
27 intervention and at a follow-up survey within 1 week after the end of the intervention  
28 (Figure 3).

### 29 30 **Baseline information**

31 Baseline information including age, sex, disease history (hypertension, heart  
32 disease, diabetes, hyperlipidaemia, osteoporosis, and respiratory disease), and low-back  
33 and knee pain will be obtained by face-to-face interview.

### 34 35 **Assessments**

36 Objective outcomes including physical fitness, posture, cognition, BDNF, and

1 physical activity will be assessed by research staff blinded to allocation information.

### 2 3 HR-QoL

4 HR-QoL will be assessed using the Japanese version of the SF-36, which is a  
5 widely used, reliable, and validated tool.[13 14] The SF-36 measures eight health  
6 domains: physical function, physical role, body pain, general health, vitality, social  
7 function, emotional role, and mental health. These domains are aggregated and scored  
8 into the MCS, PCS, and RCS (Figure 2).[15] These scores are standardised as T-scores  
9 using the 2017 Japanese national norm.[16] A change of three or more points in the MCS  
10 or two or more points in the PCS constitutes a minimal clinically important difference,  
11 enabling clinical interpretation of changes in scores.[17]

### 12 13 Frailty phenotype

14 Frailty phenotype will be assessed using Fried's frailty criteria, characterised by  
15 five limitations: slowness, weakness, exhaustion, low activity, and weight loss.[2] The  
16 trial will use the revised J-CHS criteria to define frailty (three or more limitations) and  
17 pre-frailty (one or two limitations).[18]

#### 18 19 *Slowness*

20 Slowness will be assessed based on usual gait speed. An 11 m walking path will  
21 be used, with a 3 m acceleration/deceleration path at each end. The assessor will measure  
22 the time taken between the 3 and 8 m markers.[19] The measurement will be performed  
23 once. Slowness will be defined as a gait speed of less than 1.0 m/sec.

#### 24 25 *Weakness*

26 Weakness will be assessed based on grip strength using a handheld Smedley-type  
27 dynamometer. Participants will be instructed to grip the device as strongly as possible  
28 with their dominant hand in a standing position.[19] The measurement will be performed  
29 once. Weakness will be defined as less than 28 and 18 kg for men and women,  
30 respectively.

#### 31 32 *Exhaustion*

33 Exhaustion will be assessed using question 25 of the Kihon checklist developed  
34 by the Ministry of Health, Labour and Welfare, as follows:[20] "In the last 2 weeks, have  
35 you felt tired for no reason?" Exhaustion will be defined by a "yes" response.

1  
2  
3  
4  
5  
6 1 *Low activity*

7 2 Low activity will be assessed using two simple questions regarding participation  
8 3 in exercise or physical activity, as follows: 1) “How often do you engage in light intensity  
9 4 exercise or calisthenics?” and 2) “How often do you engage in exercise or sports  
10 5 activities”? Low activity will be defined by a response of “less than once a week” to both  
11 6 questions.  
12 7

13 8 *Weight loss*

14 9 Weight loss will be assessed using question 11 of the Kihon checklist developed  
15 10 by the Ministry of Health, Labour and Welfare, as follows:[20] “Have you lost 2 kg or  
16 11 more in the past 6 months?” Weight loss will be defined by a “yes” response.  
17 12

18 13 *Physical fitness*

19 14 Six physical fitness domains (agility/dynamic balance, lower body strength, upper  
20 15 body strength, lower body flexibility, upper body flexibility, and aerobic endurance) will  
21 16 be assessed using Senior Fitness Tests.[21]  
22 17

23 18 *Agility and dynamic balance*

24 19 Agility and dynamic balance will be assessed using the 8-foot up-and-go test.  
25 20 Participants will be instructed to stand up at the start signal, walk around a cone 8 ft away,  
26 21 turn around, and sit down again. This sequence must be performed as quickly as possible.  
27 22 After one practice session, two trials will be performed. The values for the minimum time  
28 23 required will be used in the analysis.  
29 24

30 25 *Lower body strength*

31 26 Lower body strength will be assessed using the chair stand test. At test onset,  
32 27 participants will be instructed to stand up and sit down again with their arms crossed in  
33 28 front of the chest. After 2–3 practice sequences of this exercise, a single trial will be  
34 29 performed, in which the sequence is repeated as quickly as possible for 30 s. The values  
35 30 of the number of sequences achieved will be used in the analysis.  
36 31

37 32 *Upper body strength*

38 33 Upper body strength will be assessed using the arm curl test. Participants will be  
39 34 requested to flex and extend the elbow of the dominant arm while holding a dumbbell (8  
40 35 lb for men and 5 lb for women) at the start signal, with both upper arms in a natural down  
41 36 position. After 2–3 practice sequences, a single trial will be performed, in which the  
42 43  
44 45  
46 47  
48 49  
49 50  
50 51  
51 52  
52 53  
53 54  
54 55  
55 56  
56 57  
57 58  
58 59  
59 60



1 sequence will be repeated as quickly as possible for 30 s.

### 2 3 *Lower body flexibility*

4 Lower body flexibility will be assessed using the chair sit-and-reach test.  
5 Participants will be requested to sit in a shallow position on a chair and extend their  
6 favourite leg. Participants will then be instructed to place the fingertips of both hands  
7 together, slowly flex the upper body towards the toes of the favourite leg until reaching  
8 their limit, and remaining still for 2 s. Participants will be instructed to hold the ankle  
9 joint at 90°. The assessor will measure the distance between the toes of the favourite leg  
10 and fingertips of both hands using a ruler. After two practice sessions, the measurements  
11 will be performed twice. The best values will be used in the analysis.

### 12 13 *Upper body flexibility*

14 Upper body flexibility will be assessed using the back scratch test. In an upright  
15 position, the participant will be instructed to rotate the favourite hand backwards  
16 obliquely upward and the other hand backwards obliquely downward to the posterior  
17 region. The assessor will measure the shortest distance between the middle fingers of both  
18 hands using a ruler. The measurement will be performed twice. The best values will be  
19 used in the analysis.

### 20 21 *Aerobic endurance*

22 Aerobic endurance will be assessed using a 2-min step-in-place test. The assessor  
23 will mark a wall with masking tape midway between the participant's patella and iliac  
24 crest. The participant will be instructed to stand next to the wall and march in place for 2  
25 min. Participants who face difficulties marching for the 2 min will be allowed to take a  
26 break and hold the wall or a stable chair. The assessor will record the number of times the  
27 right knee reaches the marker within 2 minutes. The trial will be conducted once.

### 28 29 *Anthropometric indices*

#### 30 *Body height, weight, and body mass index*

31 Height will be measured using a digital height meter (DSN-70; MURATEC-KDS  
32 Corporation). Body weight is measured using a body composition analyser (InBody770,  
33 InBody Co. Ltd., Seoul, Korea). Body mass index is calculated by dividing the weight  
34 (kg) by the square of the height (m).

#### 35 *Posture*

36 Posture will be assessed by the degree of kyphosis and the range of motion of the

1 spine. The degree of kyphosis is assessed by the thoracic kyphosis angle (KA) and lumbar  
2 lordosis angle.[22 23]

3 Thoracic KA and lumbar lordosis angles are measured using the Idiag M360  
4 (Idiag AG, Switzerland). The participant is first instructed to stand in a normal position,  
5 and then the assessor moves the Idiag M360 along the spinous processes from the vertebra  
6 prominens (C7) to the third cervical vertebra (C3). The trial is conducted once, and the  
7 smaller the angle of the thoracic KA, the severer the kyphosis, whereas the larger the  
8 lumbar lordosis angle, the severer the kyphosis.[22 23]

9 The range of motion of the spine is measured using the Idiag M360 (Idiag AG,  
10 Switzerland).[22 23] The assessor moves the Idiag M360 over the spinous processes from  
11 C7 to C3 in the maximum forward flexion and extension positions. Range of motion is  
12 assessed as the difference between the thoracic KA and lumbar lordosis angle at  
13 maximum forward flexion and maximum extension, based on the angles measured for the  
14 thoracic KA and lumbar lordosis angle.

## 15 16 Cognition

17 Attention and executive function will be assessed using Parts A and B of the trail  
18 making test (TMT).[24] In Part A, participants must connect the numbers in ascending  
19 order, and the time taken for finalising the task is measured (i.e. 1-2-3-4...). In Part B, the  
20 task is to connect the numbers and kana characters in an alternating order (i.e. 1-A-2-I...),  
21 and the time taken for finalising the task is measured.

## 22 23 Home-based exercise self-efficacy

24 The participants' home-based exercise self-efficacy will be assessed using the  
25 Home-Exercise Barrier Self-Efficacy Scale.[25] Participants will be asked to respond to  
26 six exercise situations at home (1: when I am tired, 2: when I am in pain, 3: when I do not  
27 feel very good, 4: when I do not have time, 5: when I do not have the equipment or  
28 environment to exercise, 6: when I am alone) on a 5-point Likert scale ranging from 1  
29 (*not at all confident*) to 5 (*absolutely confident*). Details on items and scoring are  
30 described in prior research.[25] Total scores range from 5–30, with higher scores  
31 indicating greater self-efficacy in home-based exercise.

## 32 33 Depressive symptoms

34 Depressive symptoms will be assessed using the short version of the Geriatric  
35 Depression Scale.[26] Participants will be asked to answer to 15 yes-or-no questions  
36 about their daily mood. Details on items and scoring are described in prior research.[26]

1  
2  
3  
4  
5  
6 1 Total scores range from 0–15, with higher scores indicating a more depressed mood.  
7 2

8  
9 3 BDNF

10 4 BDNF is the most widely expressed neurotrophic in the mammalian brain and an  
11 5 important regulator of the development and function of neural circuits in the brain.[27]  
12 6 Exercise-induced BDNF mediates neuronal differentiation and growth, synapse  
13 7 formation and plasticity, and may explain how exercise training improves mental health  
14 8 and cognitive function.[28]

15 9 Participants will fast for at least two hours and a blood sample will be collected from the  
16 10 anterior elbow vein. To exclude the potential effects of acute exercise, participants will  
17 11 be asked to refrain from engaging in vigorous intensity exercise for 36 hours before the  
18 12 blood sample collection. To control for diurnal variation, participants will have their  
19 13 blood drawn at the same time of day in both the baseline and follow-up assessments.  
20 14 Blood samples will be processed according to the manufacturer's specifications: plasma  
21 15 is obtained by centrifugation at 3,000 g for 10 min at 22°C, aliquoted, and stored at -80°C  
22 16 until measurement. Plasma samples will be assessed for BDNF concentrations using a  
23 17 commercially available two-site sandwich enzyme-linked immunosorbent assay kit  
24 18 (R&D Systems, Minneapolis, MN, USA). The analysis will be conducted centrally in an  
25 19 independent laboratory.  
26 20

27 21 Social network

28 22 Social network will be assessed using the Japanese version of the Lubben Social  
29 23 Network Scale-6 (LSNS-6).[29] Participants will answer six questions regarding support,  
30 24 indicating the number of family members and friends who can provide them with  
31 25 emotional and instrumental support from the five given options. Details on items/scoring  
32 26 are described in prior research.[29] Total scores range from 0–30, with higher scores  
33 27 indicating a larger social network.  
34 28

35 29 Habitual energy intake

36 30 Habitual energy intake will be assessed using a reliable and valid brief self-  
37 31 administered diet history questionnaire developed to provide a simple estimate of energy  
38 32 intake over the past month.[30 31] Participants will be asked to recall their average dietary  
39 33 habits over the past month and indicate the frequency of consumption of each food item.  
40 34 Habitual energy intake will be calculated using a special software provided by Gender  
41 35 Medical Research Co. Japan.  
42 36

## Habitual physical activity

Habitual physical activity levels will be assessed based on the average number of steps taken daily. The number of steps will be measured using validated tri-axis accelerometers and algorithms (Active style Pro HJA-750C; Omron Healthcare, Tokyo, Japan).[32 33] Participants will be instructed to wear the device around the waist for 7 days from baseline and follow-up assessments during all activities of daily living from waking to bedtime, except for underwater activities (e.g. bathing and swimming). A record is valid if the device is worn for at least 10 h/day.[34] If valid records are collected for more than three days, the number of steps daily is calculated.

## Habitual sleep conditions

Sleep condition will be subjectively assessed using the Japanese version of the Pittsburgh Sleep Quality Index,[35 36] comprising 7 components: sleep quality, time to fall asleep, time to stay asleep, sleep efficiency, difficulty sleeping, use of sleeping pills, and difficulty waking up during the day in the past month. Details on items and scoring are described in prior research.[35 36] Total scores range from 0–21, with higher scores indicating a worse subjective sleep condition.

## Adverse events

Adverse events are defined in this study as any undesirable/unintended sign, symptom, or disease occurring during the intervention, regardless of causality. The number of adverse events that occur during the intervention period will be assessed. Trial physicians will determine adverse event severity and potential relevance to the intervention. Any adverse events (e.g. subjective symptoms, falls, and other surgical or medical findings) suspected to relate to the intervention will be recorded. Research staff will ask participants if they have experienced an adverse event by telephone or in person every fortnight.

## Adherence

Adherence will be assessed by the retention rate during the intervention period and the rate of practice of the Radio-Taiso exercise programme. Retention rate is calculated as the percentage of participants who complete the follow-up assessment. The rate of practice of the programme is calculated by dividing the number of practice days (days when the exercises are practiced at least once a day) by 84 days. The total number of practice sessions of the programme will also be assessed.

## 1 **Sample size**

2           Based on the pilot trial, the effect size (Cohen's d) of the programme on MCS  
3 score was 0.395. Using G\*Power version 3.1.9.2 for Windows (Heinrich-Heine-  
4 Universität Düsseldorf),[37] with the alpha error set at 5%, a power of 80%, and this  
5 effect size, the sample required was 204. Considering a 10% drop-out rate, the target  
6 sample is 226.

## 7 **Data management**

8           Data quality control comprises 1) measurements based on established standard  
9 operating procedures, 2) manual checks (visual checks) of questionnaires and case reports,  
10 and 3) data entry using the double-entry method. Manual checks include confirmation of  
11 compliance with eligibility criteria, missing measurements, and value ranges. After  
12 entering all the data, the person responsible for the analysis will perform logical check  
13 (programming check) and data coding to ensure and fix any issues pertaining to data  
14 quality. These checks include examining for outliers.

## 15 **Statistical analysis**

16           As "tests of baseline homogeneity" in randomised controlled trials do not have  
17 any practical value,[38] comparison of baseline characteristics will not be performed in  
18 this study. At baseline, continuous variables are presented as mean (standard deviation)  
19 or median (interquartile range) and categorical variables as n (%).

### 20 **Main analysis**

21           To test programme effectiveness, changes in the primary outcome will be  
22 compared between both groups using an ANCOVA model adjusted for allocation  
23 stratification factors and baseline values. Changes in secondary outcomes will be  
24 compared using the same model. Differences between groups in change for each outcome  
25 will be expressed as differences in adjusted means (95% confidence intervals). Statistical  
26 significance will be set at a  $P < 0.05$ .

27           The results of the main analyses will be interpreted based on the intention-to-treat  
28 principle. The full analysis set will exclude participants 1) who are subsequently found  
29 not to meet the eligibility criteria; 2) never participated in the intervention programme; or  
30 3) for whom no post-randomisation data are available,[39] and be applied as the main  
31 analysis population. The International Council for Harmonisation guideline recommends  
32 applying a full analysis set that excludes these participants from the main analyses as a  
33 conservative strategy.[39]

## Additional analysis

Additional analyses using a per-protocol set will be conducted to assess the extent to which adherence affects the results. The per-protocol set will include participants who have practiced at least 75% of the home-based Radio-Taiso exercises stipulated.[40]

A sensitivity analysis will be performed to assess heterogeneity owing to missing follow-up data (missing bias). Missing data will be processed through multiple imputation by applying the chained equation method to generate 20 imputed datasets based on the outcome, allocation, and group variables at baseline.

To assess study generalisability, subgroup analyses will be conducted based on participants' background data (male vs. female, <75 vs. ≥75 years, and frailty vs. pre-frailty).

Retention rates and the incidence of adverse events (one or more for those who report them) will be compared between groups using Fisher's exact test or the  $\chi$ -square test. All analyses will be carried out using R, version 4.1.2 or higher (The R Foundation for Statistical Computing Platform).

## Patient and public involvement

This study will be conducted without participant involvement. Participants will not be invited to comment on study design, define relevant outcomes or interpret the results, nor contribute to the writing or editing of this paper for readability or accuracy.

## ETHICS AND DISSEMINATION

The research protocol will be conducted in accordance with the Declaration of Helsinki. The Research Ethics Committee of TMIG approved the protocol on 16 December 2021. The study protocol was registered with the University Hospital Medical Information Network Clinical Trials Registry (UMIN-CTR) on 20 March 2022 (trial registration no. UMIN000047229). All amendments to the study protocol will be disclosed to UMIN-CTR.

Study results will be presented at an international scientific conference and reported in a peer-reviewed international journal. After publication, a summary of the results will be published on the TMIG and Japan Post Insurance Co., Ltd., websites.

## DISCUSSION

Few trials have examined the effect of exercise interventions on HR-QoL in older adults with frailty diagnosed by validated assessment tools.[3 5 6] Thus, this robustly designed trial will strengthen the evidence needed to support the effectiveness of home-

1 based exercise programmes on HR-QoL. International health policy bodies, regulators  
2 and patients are increasingly recognising the importance of patient-reported outcomes,  
3 including HR-QoL, for health.[41] The results of this study will provide valuable insights  
4 that may serve to address the evidence and clinical practice gaps associated with care  
5 programmes for older adults with frailty. This study will also contribute to a better  
6 understanding of the potential mechanisms by which home-based exercise programmes  
7 can improve HR-QoL by analysing various secondary outcomes.

8 Researchers systematically compared HR-QoL between frailty and non-frailty  
9 groups, showing a moderate or greater standardised mean difference between the groups  
10 and that the frailty group had a worse HR-QoL.[42] The measures to curb the COVID-19  
11 pandemic also limit the life-space mobility of older adults with frailty and have a  
12 significant impact on QoL.[43] Patient-reported outcomes from clinical trials using  
13 scientifically robust methodologies are reflected in clinical decision-making and  
14 influence health and social care policy.[41] Thus, if this study helps to clarify the  
15 effectiveness of the proposed programme on HR-QoL, this may enable for invested  
16 stakeholders to develop a policy framework for care programmes from the perspective of  
17 older adults with frailty.

18 For a care programme targeting people with frailty to be implemented in public  
19 health policy, it must have good accessibility (i.e. low cost and high  
20 acceptability/availability) and be delivered equitably and continuously.[4] A care  
21 programme that draws on existing cultural and social resources may be able to meet these  
22 requirements. In Japan, the Radio-Taiso exercise programme has a long history of being  
23 customarily watched in different settings and is familiar to many older adults, thus being  
24 a cultural exercise programme in the country.[10] In fact, our pilot trial confirmed that  
25 adherence to the programme is very good and that it is highly compatible with daily life.  
26 Radio-Taiso is also available with low-cost to everyone via television/radio on a daily  
27 basis. To date, more than 24,600 certified Radio-Taiso instructors have been trained, and  
28 there are more than 2,000 regional bases where the programme is practised  
29 nationwide.[44] Rich in cultural and social resources, the Radio-Taiso exercise  
30 programme may serve as a socially implementable public health strategy.

31 This study has several limitations. First, although the study addresses  
32 measurement, attrition, and reporting bias, participants and treatment providers will not  
33 be blinded to allocation information; this increases the risk of performance bias and  
34 reduce effect estimation accuracy. Second, calisthenic programmes like Radio-Taiso are  
35 popular in some countries, such as China, Korea, and Scandinavia, but it remains unclear  
36 to what extent the usefulness of the Radio-Taiso exercise programmes is generalisable to

1 non-Japanese older adults with frailty.

### 2 **Acknowledgments**

3 We are grateful to the participants and the staff members of the TMIG.

### 4 **Author contributions**

5  
6 Yosuke Osuka: study concept and design, data collection and interpretation, manuscript  
7 preparation. Narumi Kojima: study concept and design, data collection and interpretation,  
8 manuscript preparation. Masamitsu Sugie: study concept and design, safety assessment,  
9 manuscript preparation. Takuya Omura: study concept and design, safety assessment,  
10 manuscript preparation. Keiko Motokawa: study concept and design, data collection and  
11 interpretation, manuscript preparation. Takuya Ueda: study concept and design, data  
12 collection and interpretation, manuscript preparation. Kazushi Maruo: study concept and  
13 design, statistical advice, randomisation, data interpretation, manuscript preparation. Risa  
14 Ono: study concept and design, intervention, data interpretation, manuscript preparation.  
15 Toshihiko Aoyama: study concept and design, data interpretation, manuscript preparation.  
16 Shigeru Inoue: study concept and design, data interpretation, manuscript preparation.  
17 Hunkyung Kim: study concept and design, data interpretation, manuscript preparation.  
18 Hiroyuki Sasai: study concept and design, analysis, data interpretation, manuscript  
19 preparation.

### 20 **Funding**

21  
22 This study will be conducted under a collaborative agreement between four institutions  
23 (TMIG, Tokyo Medical University, Japan Post Insurance Co., Ltd., and the Japan Radio-  
24 Taiso Federation). Japan Post Insurance Co., Ltd. will financially support the study and  
25 will provide the Radio-Taiso DVD free of charge, but will not be involved in the design  
26 of the study, selection of methods, recruitment of participants, data collection, analysis  
27 and interpretation, or writing of the manuscript.

28  
29 The Japan Radio-Taiso Federation will provide certified Radio-Taiso instructors free of  
30 charge and will be involved in the design of the study, intervention, data interpretation,  
31 and writing of the manuscript.

### 32 **Competing interests**

33  
34 Yosuke Osuka is the principal investigator of a joint research agreement between the four  
35 organisations; Risa Ono and Toshihiko Aoyama are accredited instructors for the Japan  
36 Radio-Taiso Federation. The Japan Post Insurance Co., Ltd. and the Japan Radio-Taiso



1 Federation are committed to the promotion and dissemination of Radio-Taiso. The other  
2 authors have no conflicts of interest to declare.

### 3 **Patient consent**

4 Patient consent form are attached in Supplementary Material 2

### 5 **Ethics approval**

6 Approved by Research Ethics Committee of TMIG on 16 December 2021.

### 7 **Data availability statement**

8 Data are available upon reasonable request.

## 10 **REFERENCES**

- 11 1. Clegg A, Young J, Iliffe S, et al. Frailty in elderly people. *Lancet* 2013;381(9868):752-  
12 62.
- 13 2. Fried LP, Tangen CM, Walston J, et al. Frailty in older adults: evidence for a phenotype.  
14 *The Journals of Gerontology Series A, Biological Sciences and Medical Sciences*  
15 2001;56(3):M146-56.
- 16 3. Puts MTE, Toubasi S, Andrew MK, et al. Interventions to prevent or reduce the level  
17 of frailty in community-dwelling older adults: a scoping review of the literature  
18 and international policies. *Age and Ageing* 2017;46(3):383-92.
- 19 4. Dent E, Martin FC, Bergman H, et al. Management of frailty: opportunities, challenges,  
20 and future directions. *Lancet* 2019;394(10206):1376-86.
- 21 5. Negm AM, Kennedy CC, Thabane L, et al. Management of frailty: a systematic review  
22 and network meta-analysis of randomized controlled trials. *J Am Med Dir Assoc*  
23 2019;20(10):1190-98.
- 24 6. Clegg AP, Barber SE, Young JB, et al. Do home-based exercise interventions improve  
25 outcomes for frail older people? Findings from a systematic review. *Reviews in*  
26 *Clinical Gerontology* 2012;22(1):68-78.
- 27 7. Navarrete-Villanueva D, Gómez-Cabello A, Marín-Puyalto J, et al. Frailty and physical  
28 fitness in elderly people: a systematic review and meta-analysis. *Sports Med*  
29 2021;51(1):143-60.
- 30 8. Japan Post Insurance Co., Ltd. Recognition and participation rates for "Radio-Taiso".  
31 2021 [Available from: [https://www.jp-](https://www.jp-life.japanpost.jp/information/assets/pdf/211011pr-6-2.pdf)  
32 [life.japanpost.jp/information/assets/pdf/211011pr-6-2.pdf](https://www.jp-life.japanpost.jp/information/assets/pdf/211011pr-6-2.pdf) accessed March 10  
33 2022.
- 34 9. Public Relations Office, Government of Japan. Highlighting Japan 2019 [14-15].  
35 Available from: [https://dwl.gov-](https://dwl.gov-online.go.jp/video/cao/dl/public_html/gov/book/hlj/20191001/html5.html#page=)  
36 [online.go.jp/video/cao/dl/public\\_html/gov/book/hlj/20191001/html5.html#page=](https://dwl.gov-online.go.jp/video/cao/dl/public_html/gov/book/hlj/20191001/html5.html#page=)

- 1  
2  
3  
4  
5  
6 1 15137.
- 7 2 10. British Broadcasting Corporation. The lifelong exercise that keeps Japan moving.  
8 3 2020 [Available from: <https://www.bbc.com/worklife/article/20200609-the-life-long-exercise-that-keeps-japan-moving> accessed March 10 2022].  
9 4
- 10 5 11. Kumagai S, Watanabe S, Shibata H, et al. [Effects of dietary variety on declines in  
11 6 high-level functional capacity in elderly people living in a community]. *Nihon*  
12 7 *Koshu Eisei Zasshi* 2003;50(12):1117-24.
- 13 8 12. Motokawa K, Watanabe Y, Edahiro A, et al. Frailty Severity and Dietary Variety in  
14 9 Japanese Older Persons: A Cross-Sectional Study. *J Nutr Health Aging*  
15 10 2018;22(3):451-56.
- 16 11 13. Fukuhara S, Bito S, Green J, et al. Translation, adaptation, and validation of the SF-  
17 12 36 Health Survey for use in Japan. *Journal of Clinical Epidemiology*  
18 13 1998;51(11):1037-44.
- 19 14 14. Fukuhara S, Ware JE, Jr., Kosinski M, et al. Psychometric and clinical tests of validity  
20 15 of the Japanese SF-36 Health Survey. *Journal of Clinical Epidemiology*  
21 16 1998;51(11):1045-53.
- 22 17 15. Suzukamo Y, Fukuhara S, Green J, et al. Validation testing of a three-component  
23 18 model of Short Form-36 scores. *Journal of Clinical Epidemiology*  
24 19 2011;64(3):301-8.
- 25 20 16. Fukuhara S, Suzukamo Y. Manual of SF-36v2 Japanese version. Kyoto: iHope  
26 21 International Inc 2004, 2019.
- 27 22 17. Maruish ME. User's Manual for the SF-36v2 Health Survey: Quality Metric  
28 23 Incorporated 2011.
- 29 24 18. Satake S, Arai H. The revised Japanese version of the Cardiovascular Health Study  
30 25 criteria (revised J-CHS criteria). *Geriatr Gerontol Int* 2020;20(10):992-93.
- 31 26 19. Shinkai S, Watanabe S, Kumagai S, et al. Walking speed as a good predictor for the  
32 27 onset of functional dependence in a Japanese rural community population. *Age*  
33 28 *Ageing* 2000;29(5):441-6.
- 34 29 20. Sewo Sampaio PY, Sampaio RA, Yamada M, et al. Systematic review of the Kihon  
35 30 Checklist: Is it a reliable assessment of frailty? *Geriatrics & Gerontology*  
36 31 *International* 2016;16(8):893-902.
- 32 32 21. Rikli RE, Jones CJ. Development and validation of a functional fitness test for  
33 33 community-residing older adults. *J Aging Phys Act* 1999;7(2):129-61.
- 34 34 22. Mannion AF, Knecht K, Balaban G, et al. A new skin-surface device for measuring  
35 35 the curvature and global and segmental ranges of motion of the spine: reliability  
36 36 of measurements and comparison with data reviewed from the literature. *Eur*

- 1  
2  
3  
4  
5  
6 1 *Spine J* 2004;13(2):122-36.
- 7 2 23. Post RB, Leferink VJ. Spinal mobility: sagittal range of motion measured with the  
8 3 SpinalMouse, a new non-invasive device. *Arch Orthop Trauma Surg*  
9 4 2004;124(3):187-92.
- 10 5 24. Army Individual Test Battery. Washington, DC: War Department: Adjutant General's  
11 6 Office 1944.
- 12 7 25. Arita N, Takenaka K, Shimazaki T. Development of a home-exercise barrier self-  
13 8 efficacy scale for elderly people requiring support and care. *Journal of the*  
14 9 *Japanese Physical Therapy Association* 2014;41(6):338-46.
- 15 10 26. Yatomi N. The factor structure and item characteristic of the GDS (Geriatric  
16 11 Depression Scale) short version in a Japanese elderly sample. *Japanese Journal*  
17 12 *of Gerontology* 1994;16(1):29-36.
- 18 13 27. Park H, Poo MM. Neurotrophin regulation of neural circuit development and function.  
19 14 *Nat Rev Neurosci* 2013;14(1):7-23.
- 20 15 28. Knaepen K, Goekint M, Heyman EM, et al. Neuroplasticity - exercise-induced  
21 16 response of peripheral brain-derived neurotrophic factor: a systematic review of  
22 17 experimental studies in human subjects. *Sports Med* 2010;40(9):765-801.
- 23 18 29. Kurimoto A, Awata S, Ohkubo T, et al. [Reliability and validity of the Japanese  
24 19 version of the abbreviated Lubben Social Network Scale]. *Nihon Ronen Igakkai*  
25 20 *Zasshi* 2011;48(2):149-57.
- 26 21 30. Kobayashi S, Murakami K, Sasaki S, et al. Comparison of relative validity of food  
27 22 group intakes estimated by comprehensive and brief-type self-administered diet  
28 23 history questionnaires against 16 d dietary records in Japanese adults. *Public*  
29 24 *Health Nutrition* 2011;14(7):1200-11.
- 30 25 31. Kobayashi S, Honda S, Murakami K, et al. Both comprehensive and brief self-  
31 26 administered diet history questionnaires satisfactorily rank nutrient intakes in  
32 27 Japanese adults. *Journal of Epidemiology* 2012;22(2):151-9.
- 33 28 32. Oshima Y, Kawaguchi K, Tanaka S, et al. Classifying household and locomotive  
34 29 activities using a triaxial accelerometer. *Gait Posture* 2010;31(3):370-4.
- 35 30 33. Ohkawara K, Oshima Y, Hikiyama Y, et al. Real-time estimation of daily physical  
36 31 activity intensity by a triaxial accelerometer and a gravity-removal classification  
37 32 algorithm. *Br J Nutr* 2011;105(11):1681-91.
- 38 33 34. Troiano RP, Berrigan D, Dodd KW, et al. Physical activity in the United States  
39 34 measured by accelerometer. *Medicine and Science in Sports and Exercise*  
40 35 2008;40(1):181-8.
- 41 36 35. Doi Y, Minowa M, Uchiyama M, et al. Psychometric assessment of subjective sleep  
42  
43  
44  
45  
46  
47  
48  
49  
50  
51  
52  
53  
54  
55  
56  
57  
58  
59  
60

- 1  
2  
3  
4  
5  
6 1 quality using the Japanese version of the Pittsburgh Sleep Quality Index (PSQI-J)  
7 2 in psychiatric disordered and control subjects. *Psychiatry Research* 2000;97(2-  
8 3 3):165-72.  
9  
10 4 36. Doi Y, Minowa M, Okawa M, et al. Development of the Japanese version of the  
11 5 Pittsburgh Sleep Quality Index. *Japan Journal of Psychiatry Treatment*  
12 6 1998;13(6):755-63 (in Japanese).  
13 7 37. Faul F, Erdfelder E, Lang AG, et al. G\*Power 3: a flexible statistical power analysis  
14 8 program for the social, behavioral, and biomedical sciences. *Behav Res Methods*  
15 9 2007;39(2):175-91.  
16 10 38. Senn S. Testing for baseline balance in clinical trials. *Stat Med* 1994;13(17):1715-26.  
17 11 39. The International Council for Harmonisation. E9 Statistical Principles for Clinical  
18 12 Trials: The International Council for Harmonisation; 1998 [Available from:  
19 13 [https://database.ich.org/sites/default/files/E9\\_Guideline.pdf](https://database.ich.org/sites/default/files/E9_Guideline.pdf) accessed October 16  
20 14 2021.  
21 15 40. Hawley-Hague H, Horne M, Skelton DA, et al. Review of how we should define (and  
22 16 measure) adherence in studies examining older adults' participation in exercise  
23 17 classes. *BMJ Open* 2016;6(6):e011560.  
24 18 41. Calvert M, Kyte D, Mercieca-Bebber R, et al. Guidelines for Inclusion of Patient-  
25 19 Reported Outcomes in Clinical Trial Protocols: The SPIRIT-PRO Extension.  
26 20 *JAMA* 2018;319(5):483-94.  
27 21 42. Crocker TF, Brown L, Clegg A, et al. Quality of life is substantially worse for  
28 22 community-dwelling older people living with frailty: systematic review and meta-  
29 23 analysis. *Qual Life Res* 2019;28(8):2041-56.  
30 24 43. Saraiva MD, Apolinario D, Avelino-Silva TJ, et al. The Impact of Frailty on the  
31 25 Relationship between Life-Space Mobility and Quality of Life in Older Adults  
32 26 during the COVID-19 Pandemic. *J Nutr Health Aging* 2021;25(4):440-47.  
33 27 44. The Japan Radio-Taiso Federation. Information of certified instructors and regional  
34 28 bases. 2022 [Available from: <https://www.radio-exercises.org/> accessed March 10  
35 29 2022.  
36 30

## 31 **FIGURE LEGENDS**

32 **Figure 1.** Pictures of the Radio-Taiso as a firmly established, traditional Japanese  
33 exercise programme.

34 A: Community-dwelling children get together to practice Radio-Taiso. B: Physical  
35 education classes. C: Practice in the workplace. D: Gathering and practising during  
36 community events. All pictures are provided by courtesy of the Japan Post Insurance Co.,

1  
2  
3  
4  
5  
6  
7  
8  
9  
10  
11  
12  
13  
14  
15  
16  
17  
18  
19  
20  
21  
22  
23  
24  
25  
26  
27  
28  
29  
30  
31  
32  
33  
34  
35  
36  
37  
38  
39  
40  
41  
42  
43  
44  
45  
46  
47  
48  
49  
50  
51  
52  
53  
54  
55  
56  
57  
58  
59  
60

1 Ltd.  
2 **Figure 2.** A conceptual model for explaining the mechanisms of the effect of the home-  
3 based Radio-Taiso exercise programme.  
4 HR-QoL: health-related quality of life, PCS: physical component summary, MCS: mental  
5 component summary, and RCS: role/social component summary  
6 **Figure 3.** Study flow diagram.  
7 IC: informed consent, RT: Radio-Taiso

For peer review only

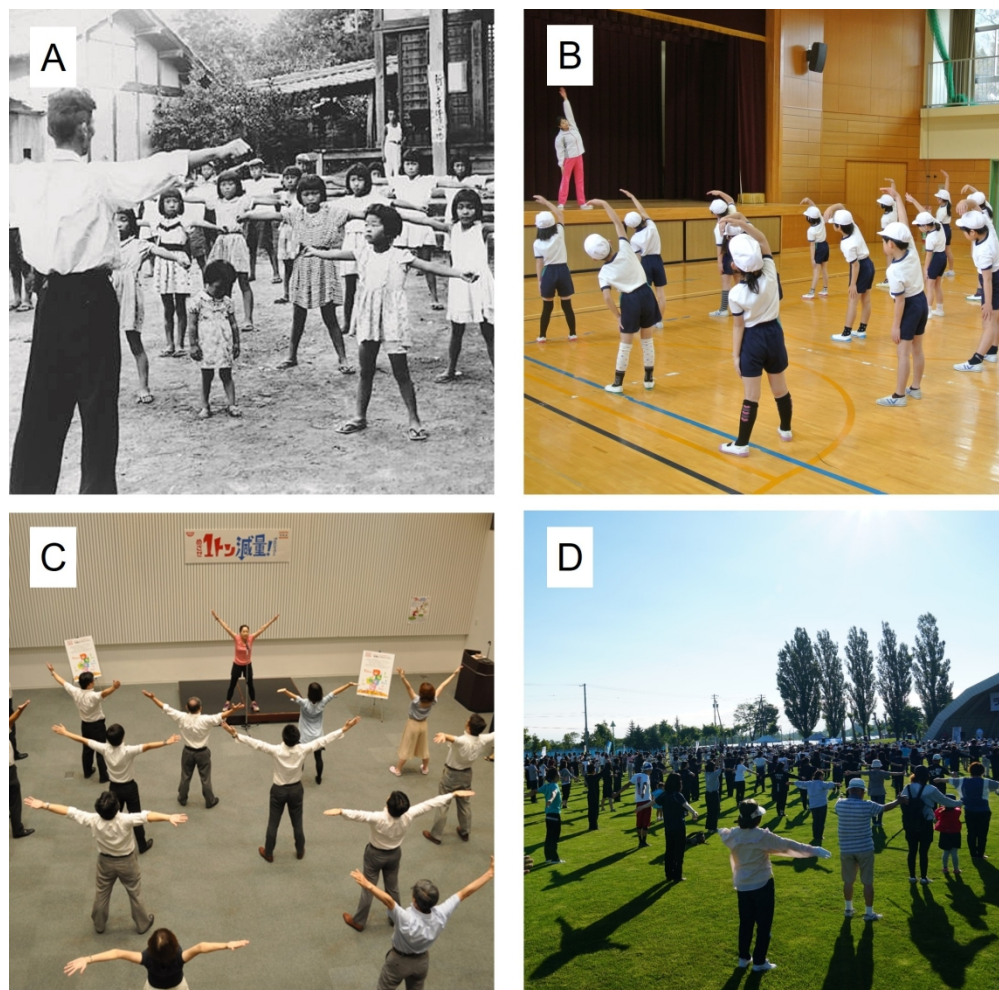

Figure 1. Pictures of the Radio-Taiso as a firmly established, traditional Japanese exercise programme.  
A: Community-dwelling children get together to practice Radio-Taiso. B: Physical education classes. C: Practice in the workplace. D: Gathering and practising during community events. All pictures are provided by courtesy of the Japan Post Insurance Co., Ltd.

169x166mm (330 x 330 DPI)

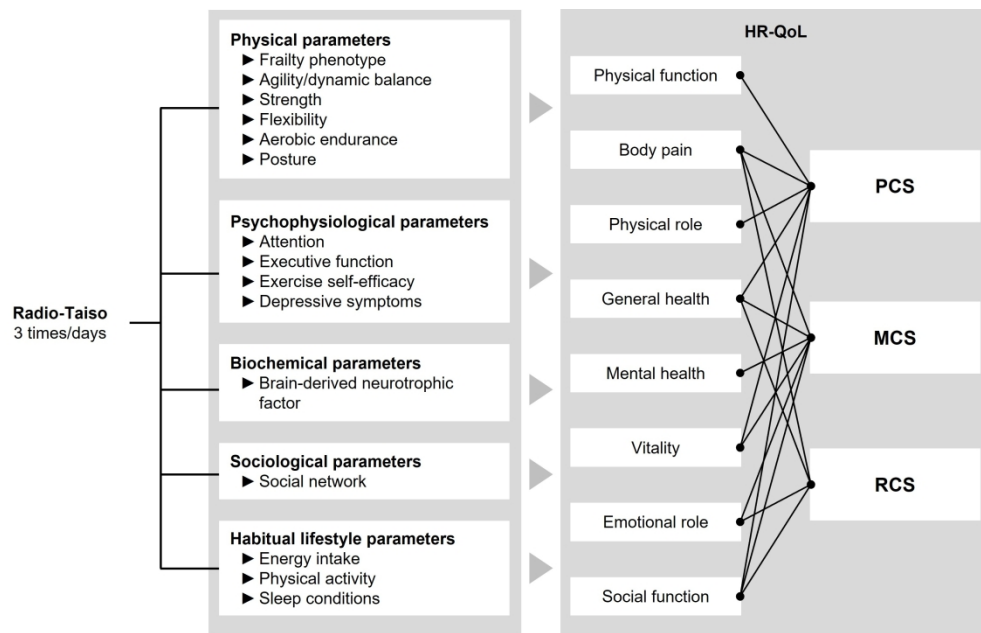

27 Figure 2. A conceptual model to explain the mechanisms of the effect of the home-based Radio-Taiso  
28 exercise programme. HR-QoL: health-related quality of life, PCS: physical component summary, MCS:  
29 mental component summary, and RCS: role/social component summary

30 255x160mm (330 x 330 DPI)

Figure 3. Study timeline of enrolment, interventions, and assessments.

| Study events           | Enrolment | IC  | Baseline assessment | Instruction | Intervention (84 days) |    |    |    |    |    |    |    | Follow-up assessment |
|------------------------|-----------|-----|---------------------|-------------|------------------------|----|----|----|----|----|----|----|----------------------|
| Days                   | -90       | -60 | 0                   | 7           | 14                     | 21 | 28 | 35 | 49 | 63 | 77 | 91 | 98                   |
| Allowance              | ±30       | ±3  | ±3                  | ±3          | ±3                     | ±3 | ±3 | ±3 | ±3 | ±3 | ±3 | ±3 | ±3                   |
| <b>ENROLMENT:</b>      |           |     |                     |             |                        |    |    |    |    |    |    |    |                      |
| Eligibility assessment | X         | X   | X                   |             |                        |    |    |    |    |    |    |    |                      |
| IC                     |           | X   |                     |             |                        |    |    |    |    |    |    |    |                      |
| Allocation             |           |     | X                   |             |                        |    |    |    |    |    |    |    |                      |
| <b>INTERVENTIONS:</b>  |           |     |                     |             |                        |    |    |    |    |    |    |    |                      |
| RT exercise program    |           |     |                     | X           | X                      | X  | X  | X  |    | X  |    |    |                      |
| Nutrition program      |           |     |                     | X           | X                      | X  | X  | X  |    |    |    |    |                      |
| <b>ASSESSMENTS:</b>    |           |     |                     |             |                        |    |    |    |    |    |    |    |                      |
| Baseline variables     |           |     | X                   |             |                        |    |    |    |    |    |    |    |                      |
| Outcome variables      |           |     | X                   |             |                        |    |    |    |    |    |    |    | X                    |
| Adverse events         |           |     |                     |             |                        | X  |    | X  | X  | X  | X  | X  |                      |



Supplementary Table 1. Radio-Taiso part 1 (3 min 10 sec)

|    | Movement                                                | Purpose                                                                                                                                                                                |
|----|---------------------------------------------------------|----------------------------------------------------------------------------------------------------------------------------------------------------------------------------------------|
| 1  | Stretch entire body                                     | Raising the arms and stretching the entire body helps to achieve better posture                                                                                                        |
| 2  | Swing the arms and bend the legs                        | Swinging the arms to the sides while bending and stretching the legs helps to stimulate blood circulation throughout the body                                                          |
| 3  | Arm rotations                                           | Rotating the arms in large circles helps to keep the shoulder joint flexible.                                                                                                          |
| 4  | Chest stretches                                         | Opening up the chest helps to correct posture and promote respiratory function.                                                                                                        |
| 5  | Bends to each side                                      | Bending the upper body to the side helps to maintain the flexibility of the spine to make lateral movements.                                                                           |
| 6  | Backward and forward bends                              | Stretching the back and abdomen helps to maintain the flexibility of the spine to make forward and backward movements.                                                                 |
| 7  | Body twists                                             | Twisting the body helps to stretch the muscles around the hips and maintain the flexibility of the spine to make rotational movements.                                                 |
| 8  | Stretch the arms up and down                            | Stretching the arms up and down quickly and powerfully helps to develop strength and instantaneous power.                                                                              |
| 9  | Bend the body downwards at an angle and chest stretches | Bending the body downwards helps to develop muscle flexibility from the back to the back of the legs. By opening the chest, posture is corrected and respiratory function is improved. |
| 10 | Whole-body rotation                                     | Rotating the upper body in a large circle helps to increase the flexibility of the entire spine, especially its lower back portion.                                                    |
| 11 | Jumps                                                   | Making rhythmic jumps helps to promote blood circulation throughout the body and increase leg strength.                                                                                |
| 12 | Swing the arms and bend the legs                        | Swinging the arms to the side and bending and stretching the legs together while being aware of                                                                                        |

breathing helps the person take time to organise their body, mind, and breath.

13 Deep breath

Breathing deeply while moving the arms widely helps bring the body back to a normal state.

---

URL: [https://www.youtube.com/watch?v=\\_YZZfaMGEOU](https://www.youtube.com/watch?v=_YZZfaMGEOU)

For peer review only

Supplementary Table 2. Radio-Taiso part 2 (3 min 5 sec)

|    | Movement                                              | Purpose                                                                                                                                                 |
|----|-------------------------------------------------------|---------------------------------------------------------------------------------------------------------------------------------------------------------|
| 1  | Shake the whole body                                  | Making light jumps helps to shake and relax the whole body and prepare it for the exercises.                                                            |
| 2  | Bend and stretch the arms and legs                    | Vigorously bending and stretching the arms and legs helps to promote blood circulation throughout the body.                                             |
| 3  | Open arms from the front and rotate                   | Opening and rotating of the arms helps to relax the muscles around the shoulder and increase the range of motion of the shoulder joint.                 |
| 4  | Chest stretches                                       | Opening up the chest helps to correct posture and promote respiratory function.                                                                         |
| 5  | Bends to each side                                    | Bending the upper body to the side helps to maintain the flexibility of the spine to make lateral movements.                                            |
| 6  | Backward and forward bends                            | Stretching the back and abdomen helps to maintain the flexibility of the spine to make forward and backward movements.                                  |
| 7  | Body twists                                           | Twisting the body helps to stretch the muscles around the hips and maintain the flexibility of the spine to make rotational movements.                  |
| 8  | One-legged jump and step exercise                     | Making jumps and steps with just one leg helps to increase muscle strength, instantaneous power in the legs, and blood circulation throughout the body. |
| 9  | Bend backwards with twist and bend downwards at angle | Twisting and bending the whole body helps to stretch the muscles of the torso and chest and increase flexibility.                                       |
| 10 | Tilt the body forward                                 | Moving the upper body up and down while leaning forward helps to strengthen the muscles of the back and achieve better posture.                         |
| 11 | Jumps                                                 | Making rhythmic jumps helps to promote blood circulation throughout the body and increase leg                                                           |

1  
2  
3  
4  
5 strength.

6 12 Swing the arms and bend the legs

Swinging the arms and bending the legs together while being aware of breathing helps the person  
7 to take some time to organise the body, mind, and breath.

8  
9 13 Deep breath

Breathing deeply while moving your arms widely helps to bring the body back to a normal state.

---

10  
11 URL: <https://www.youtube.com/watch?v=yi1TbzML2cU>

12  
13  
14  
15  
16  
17  
18  
19  
20  
21  
22  
23  
24  
25  
26  
27  
28  
29  
30  
31  
32  
33  
34  
35  
36  
37  
38  
39  
40  
41  
42  
43  
44  
45  
46

For peer review only

Supplementary Table 3. Minna no Taiso (4 min 30 sec)

| Movement                   | Purpose                                                                                                                                                                        |
|----------------------------|--------------------------------------------------------------------------------------------------------------------------------------------------------------------------------|
| 1 Hands and arms exercises | Moving the hands and arms well promotes peripheral blood circulation and the development of a sense of movement.                                                               |
| 2 Chest exercise           | Making chest movements helps to correct posture and improve respiratory function.                                                                                              |
| 3 Upper body bounce        | Bouncing the entire body while bending the upper body helps to relax the whole body, promote blood circulation, and maintain chest flexibility.                                |
| 4 Neck exercises           | Moving and stretching the neck helps to stretch the muscles from the neck to the shoulders and stimulate blood circulation in these areas.                                     |
| 5 Moving quickly           | Quickly extending the arm while shifting the body weight helps to increase the instantaneous power of the whole body.                                                          |
| 6 Leg and hip exercises    | Moving the legs and hip helps to strengthen the muscles of these parts, increase hip flexibility, and a sense of balance.                                                      |
| 7 Arm and leg exercises    | Making movements with the arms and legs that lead the person to try to make the arm movements match the movements of the whole body helps to develop coordination of movement. |
| 8 Deep breath              | Breathing deeply while moving your arms widely helps to bring the body back to a normal state.                                                                                 |

URL: <https://www.youtube.com/watch?v=1MGsuinREIk>



SPIRIT 2013 Checklist: Recommended items to address in a clinical trial protocol and related documents\*

| Section/item                      | Item No | Description                                                                                                                                                                                                                                                                              | Addressed on page number |
|-----------------------------------|---------|------------------------------------------------------------------------------------------------------------------------------------------------------------------------------------------------------------------------------------------------------------------------------------------|--------------------------|
| <b>Administrative information</b> |         |                                                                                                                                                                                                                                                                                          |                          |
| Title                             | 1       | Descriptive title identifying the study design, population, interventions, and, if applicable, trial acronym                                                                                                                                                                             | Page 1                   |
| Trial registration                | 2a      | Trial identifier and registry name. If not yet registered, name of intended registry                                                                                                                                                                                                     | Page 2                   |
|                                   | 2b      | All items from the World Health Organization Trial Registration Data Set                                                                                                                                                                                                                 | Not applicable           |
| Protocol version                  | 3       | Date and version identifier                                                                                                                                                                                                                                                              | Page 2                   |
| Funding                           | 4       | Sources and types of financial, material, and other support                                                                                                                                                                                                                              | Page 18                  |
| Roles and responsibilities        | 5a      | Names, affiliations, and roles of protocol contributors                                                                                                                                                                                                                                  | Pages 18                 |
|                                   | 5b      | Name and contact information for the trial sponsor                                                                                                                                                                                                                                       | Page 17–18               |
|                                   | 5c      | Role of study sponsor and funders, if any, in study design; collection, management, analysis, and interpretation of data; writing of the report; and the decision to submit the report for publication, including whether they will have ultimate authority over any of these activities | Page 17–18               |
|                                   | 5d      | Composition, roles, and responsibilities of the coordinating centre, steering committee, endpoint adjudication committee, data management team, and other individuals or groups overseeing the trial, if applicable (see Item 21a for data monitoring committee)                         | Not applicable           |

|    |                                                           |     |                                                                                                               |            |
|----|-----------------------------------------------------------|-----|---------------------------------------------------------------------------------------------------------------|------------|
| 1  | <b>Introduction</b>                                       |     |                                                                                                               |            |
| 2  |                                                           |     |                                                                                                               |            |
| 3  | Background and                                            | 6a  | Description of research question and justification for undertaking the trial, including summary of relevant   | Page 4     |
| 4  | rationale                                                 |     | studies (published and unpublished) examining benefits and harms for each intervention                        |            |
| 5  |                                                           |     |                                                                                                               |            |
| 6  |                                                           | 6b  | Explanation for choice of comparators                                                                         | Page 4     |
| 7  |                                                           |     |                                                                                                               |            |
| 8  | Objectives                                                | 7   | Specific objectives or hypotheses                                                                             | Pages 4–5  |
| 9  |                                                           |     |                                                                                                               |            |
| 10 | Trial design                                              | 8   | Description of trial design including type of trial (eg, parallel group, crossover, factorial, single group), |            |
| 11 |                                                           |     | allocation ratio, and framework (eg, superiority, equivalence, noninferiority, exploratory)                   | Page 5     |
| 12 |                                                           |     |                                                                                                               |            |
| 13 |                                                           |     |                                                                                                               |            |
| 14 | <b>Methods: Participants, interventions, and outcomes</b> |     |                                                                                                               |            |
| 15 |                                                           |     |                                                                                                               |            |
| 16 | Study setting                                             | 9   | Description of study settings (eg, community clinic, academic hospital) and list of countries where data will | Page 5     |
| 17 |                                                           |     | be collected. Reference to where list of study sites can be obtained                                          |            |
| 18 |                                                           |     |                                                                                                               |            |
| 19 | Eligibility criteria                                      | 10  | Inclusion and exclusion criteria for participants. If applicable, eligibility criteria for study centres and  | Pages 5    |
| 20 |                                                           |     | individuals who will perform the interventions (eg, surgeons, psychotherapists)                               |            |
| 21 |                                                           |     |                                                                                                               |            |
| 22 | Interventions                                             | 11a | Interventions for each group with sufficient detail to allow replication, including how and when they will be | Pages 6–8  |
| 23 |                                                           |     | administered                                                                                                  |            |
| 24 |                                                           |     |                                                                                                               |            |
| 25 |                                                           | 11b | Criteria for discontinuing or modifying allocated interventions for a given trial participant (eg, drug dose  | Page 7     |
| 26 |                                                           |     | change in response to harms, participant request, or improving/worsening disease)                             |            |
| 27 |                                                           |     |                                                                                                               |            |
| 28 |                                                           | 11c | Strategies to improve adherence to intervention protocols, and any procedures for monitoring adherence        | Pages 7–8  |
| 29 |                                                           |     | (eg, drug tablet return, laboratory tests)                                                                    |            |
| 30 |                                                           |     |                                                                                                               |            |
| 31 |                                                           | 11d | Relevant concomitant care and interventions that are permitted or prohibited during the trial                 | Page 6     |
| 32 |                                                           |     |                                                                                                               |            |
| 33 | Outcomes                                                  | 12  | Primary, secondary, and other outcomes, including the specific measurement variable (eg, systolic blood       | Pages 8–14 |
| 34 |                                                           |     | pressure), analysis metric (eg, change from baseline, final value, time to event), method of aggregation (eg, |            |
| 35 |                                                           |     | median, proportion), and time point for each outcome. Explanation of the clinical relevance of chosen         |            |
| 36 |                                                           |     | efficacy and harm outcomes is strongly recommended                                                            |            |
| 37 |                                                           |     |                                                                                                               |            |
| 38 | Participant timeline                                      | 13  | Time schedule of enrolment, interventions (including any run-ins and washouts), assessments, and visits for   | Figure 3   |
| 39 |                                                           |     | participants. A schematic diagram is highly recommended (see Figure)                                          |            |
| 40 |                                                           |     |                                                                                                               |            |
| 41 |                                                           |     |                                                                                                               |            |
| 42 |                                                           |     |                                                                                                               |            |
| 43 |                                                           |     |                                                                                                               |            |
| 44 |                                                           |     |                                                                                                               |            |
| 45 |                                                           |     |                                                                                                               |            |
| 46 |                                                           |     |                                                                                                               |            |

|    |                                                                     |     |                                                                                                                                                                                                                                                                                                                                                                                                              |                       |
|----|---------------------------------------------------------------------|-----|--------------------------------------------------------------------------------------------------------------------------------------------------------------------------------------------------------------------------------------------------------------------------------------------------------------------------------------------------------------------------------------------------------------|-----------------------|
| 1  | Sample size                                                         | 14  | Estimated number of participants needed to achieve study objectives and how it was determined, including clinical and statistical assumptions supporting any sample size calculations                                                                                                                                                                                                                        | Pages 15              |
| 2  |                                                                     |     |                                                                                                                                                                                                                                                                                                                                                                                                              |                       |
| 3  |                                                                     |     |                                                                                                                                                                                                                                                                                                                                                                                                              |                       |
| 4  | Recruitment                                                         | 15  | Strategies for achieving adequate participant enrolment to reach target sample size                                                                                                                                                                                                                                                                                                                          | Page 6                |
| 5  |                                                                     |     |                                                                                                                                                                                                                                                                                                                                                                                                              |                       |
| 6  |                                                                     |     |                                                                                                                                                                                                                                                                                                                                                                                                              |                       |
| 7  | <b>Methods: Assignment of interventions (for controlled trials)</b> |     |                                                                                                                                                                                                                                                                                                                                                                                                              |                       |
| 8  | Allocation:                                                         |     |                                                                                                                                                                                                                                                                                                                                                                                                              |                       |
| 9  |                                                                     |     |                                                                                                                                                                                                                                                                                                                                                                                                              |                       |
| 10 | Sequence                                                            | 16a | Method of generating the allocation sequence (eg, computer-generated random numbers), and list of any factors for stratification. To reduce predictability of a random sequence, details of any planned restriction (eg, blocking) should be provided in a separate document that is unavailable to those who enrol participants or assign interventions                                                     | Page 6                |
| 11 | generation                                                          |     |                                                                                                                                                                                                                                                                                                                                                                                                              |                       |
| 12 |                                                                     |     |                                                                                                                                                                                                                                                                                                                                                                                                              |                       |
| 13 |                                                                     |     |                                                                                                                                                                                                                                                                                                                                                                                                              |                       |
| 14 |                                                                     |     |                                                                                                                                                                                                                                                                                                                                                                                                              |                       |
| 15 |                                                                     |     |                                                                                                                                                                                                                                                                                                                                                                                                              |                       |
| 16 | Allocation                                                          | 16b | Mechanism of implementing the allocation sequence (eg, central telephone; sequentially numbered, opaque, sealed envelopes), describing any steps to conceal the sequence until interventions are assigned                                                                                                                                                                                                    | Page 6                |
| 17 | concealment                                                         |     |                                                                                                                                                                                                                                                                                                                                                                                                              |                       |
| 18 | mechanism                                                           |     |                                                                                                                                                                                                                                                                                                                                                                                                              |                       |
| 19 |                                                                     |     |                                                                                                                                                                                                                                                                                                                                                                                                              |                       |
| 20 | Implementation                                                      | 16c | Who will generate the allocation sequence, who will enrol participants, and who will assign participants to interventions                                                                                                                                                                                                                                                                                    | Page 6                |
| 21 |                                                                     |     |                                                                                                                                                                                                                                                                                                                                                                                                              |                       |
| 22 |                                                                     |     |                                                                                                                                                                                                                                                                                                                                                                                                              |                       |
| 23 |                                                                     |     |                                                                                                                                                                                                                                                                                                                                                                                                              |                       |
| 24 | Blinding (masking)                                                  | 17a | Who will be blinded after assignment to interventions (eg, trial participants, care providers, outcome assessors, data analysts), and how                                                                                                                                                                                                                                                                    | Page 6                |
| 25 |                                                                     |     |                                                                                                                                                                                                                                                                                                                                                                                                              |                       |
| 26 |                                                                     |     |                                                                                                                                                                                                                                                                                                                                                                                                              |                       |
| 27 |                                                                     | 17b | If blinded, circumstances under which unblinding is permissible, and procedure for revealing a participant's allocated intervention during the trial                                                                                                                                                                                                                                                         | Not applicable        |
| 28 |                                                                     |     |                                                                                                                                                                                                                                                                                                                                                                                                              |                       |
| 29 |                                                                     |     |                                                                                                                                                                                                                                                                                                                                                                                                              |                       |
| 30 |                                                                     |     |                                                                                                                                                                                                                                                                                                                                                                                                              |                       |
| 31 | <b>Methods: Data collection, management, and analysis</b>           |     |                                                                                                                                                                                                                                                                                                                                                                                                              |                       |
| 32 |                                                                     |     |                                                                                                                                                                                                                                                                                                                                                                                                              |                       |
| 33 | Data collection                                                     | 18a | Plans for assessment and collection of outcome, baseline, and other trial data, including any related processes to promote data quality (eg, duplicate measurements, training of assessors) and a description of study instruments (eg, questionnaires, laboratory tests) along with their reliability and validity, if known. Reference to where data collection forms can be found, if not in the protocol | Pages 8–14<br>Page 15 |
| 34 | methods                                                             |     |                                                                                                                                                                                                                                                                                                                                                                                                              |                       |
| 35 |                                                                     |     |                                                                                                                                                                                                                                                                                                                                                                                                              |                       |
| 36 |                                                                     |     |                                                                                                                                                                                                                                                                                                                                                                                                              |                       |
| 37 |                                                                     |     |                                                                                                                                                                                                                                                                                                                                                                                                              |                       |
| 38 |                                                                     |     |                                                                                                                                                                                                                                                                                                                                                                                                              |                       |
| 39 |                                                                     | 18b | Plans to promote participant retention and complete follow-up, including list of any outcome data to be collected for participants who discontinue or deviate from intervention protocols                                                                                                                                                                                                                    | Pages 7–8             |
| 40 |                                                                     |     |                                                                                                                                                                                                                                                                                                                                                                                                              |                       |
| 41 |                                                                     |     |                                                                                                                                                                                                                                                                                                                                                                                                              |                       |
| 42 |                                                                     |     |                                                                                                                                                                                                                                                                                                                                                                                                              |                       |
| 43 |                                                                     |     |                                                                                                                                                                                                                                                                                                                                                                                                              |                       |
| 44 |                                                                     |     |                                                                                                                                                                                                                                                                                                                                                                                                              |                       |
| 45 |                                                                     |     |                                                                                                                                                                                                                                                                                                                                                                                                              |                       |
| 46 |                                                                     |     |                                                                                                                                                                                                                                                                                                                                                                                                              |                       |



|    |                                 |     |                                                                                                                                                                                                                                                                                                                                       |                |
|----|---------------------------------|-----|---------------------------------------------------------------------------------------------------------------------------------------------------------------------------------------------------------------------------------------------------------------------------------------------------------------------------------------|----------------|
| 1  | Data management                 | 19  | Plans for data entry, coding, security, and storage, including any related processes to promote data quality (eg, double data entry; range checks for data values). Reference to where details of data management procedures can be found, if not in the protocol                                                                     | Page 15        |
| 2  |                                 |     |                                                                                                                                                                                                                                                                                                                                       |                |
| 3  |                                 |     |                                                                                                                                                                                                                                                                                                                                       |                |
| 4  |                                 |     |                                                                                                                                                                                                                                                                                                                                       |                |
| 5  | Statistical methods             | 20a | Statistical methods for analysing primary and secondary outcomes. Reference to where other details of the statistical analysis plan can be found, if not in the protocol                                                                                                                                                              | Page 15        |
| 6  |                                 |     |                                                                                                                                                                                                                                                                                                                                       |                |
| 7  |                                 |     |                                                                                                                                                                                                                                                                                                                                       |                |
| 8  |                                 | 20b | Methods for any additional analyses (eg, subgroup and adjusted analyses)                                                                                                                                                                                                                                                              | Pages 16       |
| 9  |                                 |     |                                                                                                                                                                                                                                                                                                                                       |                |
| 10 |                                 | 20c | Definition of analysis population relating to protocol non-adherence (eg, as randomised analysis), and any statistical methods to handle missing data (eg, multiple imputation)                                                                                                                                                       | Pages 16       |
| 11 |                                 |     |                                                                                                                                                                                                                                                                                                                                       |                |
| 12 |                                 |     |                                                                                                                                                                                                                                                                                                                                       |                |
| 13 |                                 |     |                                                                                                                                                                                                                                                                                                                                       |                |
| 14 | <b>Methods: Monitoring</b>      |     |                                                                                                                                                                                                                                                                                                                                       |                |
| 15 |                                 |     |                                                                                                                                                                                                                                                                                                                                       |                |
| 16 | Data monitoring                 | 21a | Composition of data monitoring committee (DMC); summary of its role and reporting structure; statement of whether it is independent from the sponsor and competing interests; and reference to where further details about its charter can be found, if not in the protocol. Alternatively, an explanation of why a DMC is not needed | Not applicable |
| 17 |                                 |     |                                                                                                                                                                                                                                                                                                                                       |                |
| 18 |                                 |     |                                                                                                                                                                                                                                                                                                                                       |                |
| 19 |                                 |     |                                                                                                                                                                                                                                                                                                                                       |                |
| 20 |                                 |     |                                                                                                                                                                                                                                                                                                                                       |                |
| 21 |                                 |     |                                                                                                                                                                                                                                                                                                                                       |                |
| 22 |                                 | 21b | Description of any interim analyses and stopping guidelines, including who will have access to these interim results and make the final decision to terminate the trial                                                                                                                                                               | Not applicable |
| 23 |                                 |     |                                                                                                                                                                                                                                                                                                                                       |                |
| 24 |                                 |     |                                                                                                                                                                                                                                                                                                                                       |                |
| 25 | Harms                           | 22  | Plans for collecting, assessing, reporting, and managing solicited and spontaneously reported adverse events and other unintended effects of trial interventions or trial conduct                                                                                                                                                     | Page 14        |
| 26 |                                 |     |                                                                                                                                                                                                                                                                                                                                       |                |
| 27 |                                 |     |                                                                                                                                                                                                                                                                                                                                       |                |
| 28 | Auditing                        | 23  | Frequency and procedures for auditing trial conduct, if any, and whether the process will be independent from investigators and the sponsor                                                                                                                                                                                           | Not applicable |
| 29 |                                 |     |                                                                                                                                                                                                                                                                                                                                       |                |
| 30 |                                 |     |                                                                                                                                                                                                                                                                                                                                       |                |
| 31 |                                 |     |                                                                                                                                                                                                                                                                                                                                       |                |
| 32 | <b>Ethics and dissemination</b> |     |                                                                                                                                                                                                                                                                                                                                       |                |
| 33 |                                 |     |                                                                                                                                                                                                                                                                                                                                       |                |
| 34 | Research ethics approval        | 24  | Plans for seeking research ethics committee/institutional review board (REC/IRB) approval                                                                                                                                                                                                                                             | Page 16        |
| 35 |                                 |     |                                                                                                                                                                                                                                                                                                                                       |                |
| 36 |                                 |     |                                                                                                                                                                                                                                                                                                                                       |                |
| 37 | Protocol amendments             | 25  | Plans for communicating important protocol modifications (eg, changes to eligibility criteria, outcomes, analyses) to relevant parties (eg, investigators, REC/IRBs, trial participants, trial registries, journals, regulators)                                                                                                      | Page 16        |
| 38 |                                 |     |                                                                                                                                                                                                                                                                                                                                       |                |
| 39 |                                 |     |                                                                                                                                                                                                                                                                                                                                       |                |
| 40 |                                 |     |                                                                                                                                                                                                                                                                                                                                       |                |
| 41 |                                 |     |                                                                                                                                                                                                                                                                                                                                       |                |
| 42 |                                 |     |                                                                                                                                                                                                                                                                                                                                       |                |
| 43 |                                 |     |                                                                                                                                                                                                                                                                                                                                       |                |
| 44 |                                 |     |                                                                                                                                                                                                                                                                                                                                       |                |
| 45 |                                 |     |                                                                                                                                                                                                                                                                                                                                       |                |
| 46 |                                 |     |                                                                                                                                                                                                                                                                                                                                       |                |

|    |                               |     |                                                                                                                                                                                                                                                                                     |                          |
|----|-------------------------------|-----|-------------------------------------------------------------------------------------------------------------------------------------------------------------------------------------------------------------------------------------------------------------------------------------|--------------------------|
| 1  | Consent or assent             | 26a | Who will obtain informed consent or assent from potential trial participants or authorised surrogates, and how (see Item 32)                                                                                                                                                        | Page 6                   |
| 2  |                               |     |                                                                                                                                                                                                                                                                                     |                          |
| 3  |                               |     |                                                                                                                                                                                                                                                                                     |                          |
| 4  |                               | 26b | Additional consent provisions for collection and use of participant data and biological specimens in ancillary studies, if applicable                                                                                                                                               | Not applicable           |
| 5  |                               |     |                                                                                                                                                                                                                                                                                     |                          |
| 6  |                               |     |                                                                                                                                                                                                                                                                                     |                          |
| 7  | Confidentiality               | 27  | How personal information about potential and enrolled participants will be collected, shared, and maintained in order to protect confidentiality before, during, and after the trial                                                                                                | Page 6                   |
| 8  |                               |     |                                                                                                                                                                                                                                                                                     |                          |
| 9  |                               |     |                                                                                                                                                                                                                                                                                     |                          |
| 10 | Declaration of interests      | 28  | Financial and other competing interests for principal investigators for the overall trial and each study site                                                                                                                                                                       | Page 18–19               |
| 11 |                               |     |                                                                                                                                                                                                                                                                                     |                          |
| 12 |                               |     |                                                                                                                                                                                                                                                                                     |                          |
| 13 | Access to data                | 29  | Statement of who will have access to the final trial dataset, and disclosure of contractual agreements that limit such access for investigators                                                                                                                                     | Page 19                  |
| 14 |                               |     |                                                                                                                                                                                                                                                                                     |                          |
| 15 |                               |     |                                                                                                                                                                                                                                                                                     |                          |
| 16 | Ancillary and post-trial care | 30  | Provisions, if any, for ancillary and post-trial care, and for compensation to those who suffer harm from trial participation                                                                                                                                                       | Page 6                   |
| 17 |                               |     |                                                                                                                                                                                                                                                                                     |                          |
| 18 |                               |     |                                                                                                                                                                                                                                                                                     |                          |
| 19 |                               |     |                                                                                                                                                                                                                                                                                     |                          |
| 20 | Dissemination policy          | 31a | Plans for investigators and sponsor to communicate trial results to participants, healthcare professionals, the public, and other relevant groups (eg, via publication, reporting in results databases, or other data sharing arrangements), including any publication restrictions | Page 16                  |
| 21 |                               |     |                                                                                                                                                                                                                                                                                     |                          |
| 22 |                               |     |                                                                                                                                                                                                                                                                                     |                          |
| 23 |                               |     |                                                                                                                                                                                                                                                                                     |                          |
| 24 |                               | 31b | Authorship eligibility guidelines and any intended use of professional writers                                                                                                                                                                                                      | Not applicable           |
| 25 |                               |     |                                                                                                                                                                                                                                                                                     |                          |
| 26 |                               | 31c | Plans, if any, for granting public access to the full protocol, participant-level dataset, and statistical code                                                                                                                                                                     | Not applicable           |
| 27 |                               |     |                                                                                                                                                                                                                                                                                     |                          |
| 28 |                               |     |                                                                                                                                                                                                                                                                                     |                          |
| 29 | <b>Appendices</b>             |     |                                                                                                                                                                                                                                                                                     |                          |
| 30 |                               |     |                                                                                                                                                                                                                                                                                     |                          |
| 31 | Informed consent materials    | 32  | Model consent form and other related documentation given to participants and authorised surrogates                                                                                                                                                                                  | Supplementary Material 2 |
| 32 |                               |     |                                                                                                                                                                                                                                                                                     |                          |
| 33 |                               |     |                                                                                                                                                                                                                                                                                     |                          |
| 34 | Biological specimens          | 33  | Plans for collection, laboratory evaluation, and storage of biological specimens for genetic or molecular analysis in the current trial and for future use in ancillary studies, if applicable                                                                                      | Not applicable           |
| 35 |                               |     |                                                                                                                                                                                                                                                                                     |                          |
| 36 |                               |     |                                                                                                                                                                                                                                                                                     |                          |

\*It is strongly recommended that this checklist be read in conjunction with the SPIRIT 2013 Explanation & Elaboration for important clarification on the items. Amendments to the protocol should be tracked and dated. The SPIRIT checklist is copyrighted by the SPIRIT Group under the Creative Commons [“Attribution-NonCommercial-NoDerivs 3.0 Unported”](https://creativecommons.org/licenses/by/4.0/) license.

## 同意書

東京都健康長寿医療センター  
センター長 殿

私は、「フレイル高齢者に対するラジオ体操の有効性を検討するランダム化並行群間比較試験」（研究代表者：大須賀洋祐）の概要についての詳細な説明を受け、自らの意思で研究に参加します。また、検査および調査結果の学術的な目的での利用に同意します。

説明を受け、理解した項目に☑してください。

- 1. 研究タイトル
- 2. 研究の背景
- 3. 研究の目的と意義
- 4. 研究の具体的な内容
- 5. 調査内容
- 6. 研究に参加することにより期待される利益と不利益
- 7. 予測される有害事象と健康被害への補償
- 8. 研究結果の取り扱い
- 9. 個人情報の保護および資料等の保管・廃棄の方法
- 10. 同意の自由と同意撤回
- 11. 費用の負担
- 12. 研究資金源および本研究に関わる利益相反
- 13. 研究計画の情報公開の方法
- 14. お問い合わせ先

### 参加者

署名日 令和4年 月 日

ご氏名：

### 説明者

署名日 令和4年 月 日

氏名：

## Note from the Editors: Instructions for reviewers of study protocols

---

Since launching in 2011, BMJ Open has published study protocols for planned or ongoing research studies. If data collection is complete, we will not consider the manuscript.

Publishing study protocols enables researchers and funding bodies to stay up to date in their fields by providing exposure to research activity that may not otherwise be widely publicised. This can help prevent unnecessary duplication of work and will hopefully enable collaboration. Publishing protocols in full also makes available more information than is currently required by trial registries and increases transparency, making it easier for others (editors, reviewers and readers) to see and understand any deviations from the protocol that occur during the conduct of the study.

The scientific integrity and the credibility of the study data depend substantially on the study design and methodology, which is why the study protocol requires a thorough peer-review.

*BMJ Open* will consider for publication protocols for any study design, including observational studies and systematic reviews.

Some things to keep in mind when reviewing the study protocol:

- Protocol papers should report planned or ongoing studies. The dates of the study should be included in the manuscript.
- Unfortunately we are unable to customize the reviewer report form for study protocols. As such, some of the items (i.e., those pertaining to results) on the form should be scores as Not Applicable (N/A).
- While some baseline data can be presented, there should be no results or conclusions present in the study protocol.
- For studies that are ongoing, it is generally the case that very few changes can be made to the methodology. As such, requests for revisions are generally clarifications for the rationale or details relating to the methods. If there is a major flaw in the study that would prevent a sound interpretation of the data, we would expect the study protocol to be rejected.

# BMJ Open

## Effects of a home-based Radio-Taiso exercise programme on health-related quality of life in older adults with frailty: protocol for an assessor-blind randomised controlled trial

|                                 |                                                                                                                                                                                                                                                                                                                                                                                                                                                                                                                                                                                                                                                                                                                                                                                                                                                                                                                                                                                                                                                                                                                                                                                                                                                                                                       |
|---------------------------------|-------------------------------------------------------------------------------------------------------------------------------------------------------------------------------------------------------------------------------------------------------------------------------------------------------------------------------------------------------------------------------------------------------------------------------------------------------------------------------------------------------------------------------------------------------------------------------------------------------------------------------------------------------------------------------------------------------------------------------------------------------------------------------------------------------------------------------------------------------------------------------------------------------------------------------------------------------------------------------------------------------------------------------------------------------------------------------------------------------------------------------------------------------------------------------------------------------------------------------------------------------------------------------------------------------|
| Journal:                        | <i>BMJ Open</i>                                                                                                                                                                                                                                                                                                                                                                                                                                                                                                                                                                                                                                                                                                                                                                                                                                                                                                                                                                                                                                                                                                                                                                                                                                                                                       |
| Manuscript ID                   | bmjopen-2022-063201.R2                                                                                                                                                                                                                                                                                                                                                                                                                                                                                                                                                                                                                                                                                                                                                                                                                                                                                                                                                                                                                                                                                                                                                                                                                                                                                |
| Article Type:                   | Protocol                                                                                                                                                                                                                                                                                                                                                                                                                                                                                                                                                                                                                                                                                                                                                                                                                                                                                                                                                                                                                                                                                                                                                                                                                                                                                              |
| Date Submitted by the Author:   | 27-Aug-2022                                                                                                                                                                                                                                                                                                                                                                                                                                                                                                                                                                                                                                                                                                                                                                                                                                                                                                                                                                                                                                                                                                                                                                                                                                                                                           |
| Complete List of Authors:       | Osuka, Yosuke; Tokyo Metropolitan Institute of Gerontology, Research Team for Promoting Independence and Mental Health<br>Kojima, Narumi; Tokyo Metropolitan Institute of Gerontology, Research Team for Promoting Independence and Mental Health<br>Sugie, Masamitsu; Tokyo Metropolitan Geriatric Hospital and Institute of Gerontology, Department of Cardiology<br>Omura, Takuya; Tokyo Metropolitan Institute of Gerontology, Department of Geriatric Medicine<br>Motokawa, Keiko; Tokyo Metropolitan Institute of Gerontology, Research Team for Promoting Independence and Mental Health<br>Ueda, Takuya; Tokyo Metropolitan Institute of Gerontology, The Tokyo Metropolitan Support Center for Preventative Long-term and Frail Elderly Care<br>Maruo, Kazushi; University of Tsukuba, Department of Biostatistics, Faculty of Medicine<br>Ono, Risa; Japan Radio-Taiso Federation<br>Aoyama, Toshihiko; Japan Radio-Taiso Federation<br>Inoue, Shigeru; Tokyo Medical University, Department of Preventive Medicine and Public Health<br>Kim, Hunkyung; Tokyo Metropolitan Institute of Gerontology, Research Team for Promoting Independence and Mental Health<br>Sasai, Hiroyuki; Tokyo Metropolitan Institute of Gerontology, Research Team for Promoting Independence and Mental Health |
| <b>Primary Subject Heading</b>: | Public health                                                                                                                                                                                                                                                                                                                                                                                                                                                                                                                                                                                                                                                                                                                                                                                                                                                                                                                                                                                                                                                                                                                                                                                                                                                                                         |
| Secondary Subject Heading:      | Geriatric medicine, Mental health, Sports and exercise medicine                                                                                                                                                                                                                                                                                                                                                                                                                                                                                                                                                                                                                                                                                                                                                                                                                                                                                                                                                                                                                                                                                                                                                                                                                                       |
| Keywords:                       | GERIATRIC MEDICINE, MENTAL HEALTH, PUBLIC HEALTH, SPORTS MEDICINE                                                                                                                                                                                                                                                                                                                                                                                                                                                                                                                                                                                                                                                                                                                                                                                                                                                                                                                                                                                                                                                                                                                                                                                                                                     |
|                                 |                                                                                                                                                                                                                                                                                                                                                                                                                                                                                                                                                                                                                                                                                                                                                                                                                                                                                                                                                                                                                                                                                                                                                                                                                                                                                                       |

SCHOLARONE™  
Manuscripts

1  
2  
3  
4  
5  
6 **1 Effects of a home-based Radio-Taiso exercise programme on health-related quality**  
7 **2 of life in older adults with frailty: protocol for an assessor-blind randomised**  
8 **3 controlled trial**  
9  
10

11 5 Yosuke Osuka<sup>1</sup>, PhD; Narumi Kojima<sup>1</sup>, MS; Masamitsu Sugie<sup>2</sup>, MD, PhD; Takuya  
12 6 Omura<sup>3</sup>, MD, PhD; Keiko Motokawa<sup>1</sup>, PhD; Takuya Ueda<sup>4</sup>, PhD; Kazushi Maruo<sup>5</sup>, PhD;  
13 7 Risa Ono<sup>6</sup>, MS; Toshihiko Aoyama<sup>6</sup>; Shigeru Inoue<sup>7</sup>, MD, PhD; Hunkyung Kim<sup>1</sup>, PhD;  
14 8 and Hiroyuki Sasai<sup>1</sup>, PhD  
15  
16  
17  
18

19 10 <sup>1</sup>Research Team for Promoting Independence and Mental Health, Tokyo Metropolitan  
20 11 Institute of Gerontology, Tokyo, Japan

21 12 <sup>2</sup>Department of Cardiology, Tokyo Metropolitan Geriatric Hospital and Institute of  
22 13 Gerontology, Tokyo, Japan

23 14 <sup>3</sup>Department of Geriatric Medicine, Tokyo Metropolitan Institute of Gerontology, Tokyo,  
24 15 Japan

25 16 <sup>4</sup>The Tokyo Metropolitan Support Center for Preventative Long-term and Frail Elderly  
26 17 Care, Tokyo Metropolitan Institute of Gerontology, Tokyo, Japan

27 18 <sup>5</sup>Department of Biostatistics, Faculty of Medicine, University of Tsukuba, Tsukuba,  
28 19 Japan

29 20 <sup>6</sup>Japan Radio-Taiso Federation, Tokyo, Japan

30 21 <sup>7</sup>Department of Preventive Medicine and Public Health, Tokyo Medical University,  
31 22 Tokyo, Japan  
32  
33

34 24 **Corresponding author**

35 25 Yosuke Osuka, PhD

36 26 Research Team for Promoting Independence and Mental Health,  
37 27 Tokyo Metropolitan Institute of Gerontology

38 28 35-2 Sakae-cho, Itabashi-ku, Tokyo 173-0015, Japan.

39 29 Phone: +81-3-3964-3241; Email: osuka@tmig.or.jp  
40  
41

42 31 **Word count**

43 32 5124/4000 words  
44  
45  
46  
47  
48  
49  
50  
51  
52  
53  
54  
55  
56  
57  
58  
59  
60

## 1 **ABSTRACT**

### 2 **Introduction**

3 Few clinical trials have examined the effects of home-based exercise programmes on  
4 health-related quality of life (HR-QoL) in older adults with frailty. Radio-Taiso is the  
5 most famous exercise programme in Japan. A home-based Radio-Taiso exercise  
6 programme may serve as an accessible, scalable, and sustainable care intervention for  
7 older adults with frailty. The primary aim of this trial is to test whether older adults with  
8 frailty who are prescribed our home-based Radio-Taiso exercise programme will receive  
9 greater benefits for HR-QoL compared to those who are not prescribed the exercise  
10 programme. Potential mechanisms underlying the effectiveness of the programme and  
11 the effects of the programme on daily lifestyle will also be investigated.

### 12 **Methods and analysis**

13 This assessor-blind randomised controlled trial will be conducted at the Tokyo  
14 Metropolitan Institute of Gerontology (TMIG) in Itabashi-ku, Tokyo, Japan. From April  
15 to May 2022, 226 older adults with pre-frailty or frailty according to the revised Japanese  
16 version of the Cardiovascular Health Study criteria will be included from a large database.  
17 After a baseline assessment in June 2022, participants will be randomly assigned to the  
18 intervention (home-based Radio-Taiso exercise and nutrition programme) or control  
19 groups (nutrition programme) at a 1:1 ratio. After intervention completion, a follow-up  
20 assessment will be conducted in September 2022. The primary outcome is the change in  
21 the mental domain of HR-QoL assessed using SF-36<sup>®</sup>. Secondary outcomes include  
22 physical and role/social domains and subscales of HR-QoL, frailty phenotype, physical  
23 fitness, posture, cognition, exercise self-efficacy, depressive symptoms, brain-derived  
24 neurotrophic factor, social network, habitual energy intake, physical activity, and sleep  
25 conditions.

### 26 **Ethics and dissemination**

27 The Research Ethics Committee of TMIG has approved the research protocol. This trial  
28 will be conducted in accordance with the principles of the Declaration of Helsinki. The  
29 findings will be presented at international academic conferences and published in peer-  
30 reviewed international journals.

### 31 **Trial registration**

32 Registry name: UMIN-CTR

33 URL: [https://center6.umin.ac.jp/cgi-open-bin/ctr\\_e/ctr\\_view.cgi?recptno=R000053863](https://center6.umin.ac.jp/cgi-open-bin/ctr_e/ctr_view.cgi?recptno=R000053863)

### 34 **Protocol version**

35 Date: 9 May 2022

36 Version identifier: 4.4

1  
2  
3  
4  
5  
6  
7  
8  
9  
10  
11  
12  
13  
14  
15  
16  
17  
18  
19  
20  
21  
22  
23  
24  
25  
26  
27  
28  
29  
30  
31  
32  
33  
34  
35  
36  
37  
38  
39  
40  
41  
42  
43  
44  
45  
46  
47  
48  
49  
50  
51  
52  
53  
54  
55  
56  
57  
58  
59  
60

1  
2  
3  
4  
5  
6  
7  
8  
9  
10  
11  
12  
13  
14  
15  
16  
17  
18  
19  
20  
21  
22  
23  
24  
25  
26  
27  
28  
29  
30  
31  
32  
33  
34  
35  
36  
37  
38  
39  
40  
41  
42  
43  
44  
45  
46  
47  
48  
49  
50  
51  
52  
53  
54  
55  
56  
57  
58  
59  
60

## Strengths and Limitations

- The feasibility of this Phase III trial has been enhanced based on the processes, resources, management, and scientific data of a pilot trial.
- The trial will include older adults with frailty defined using a validated assessment tool.
- Random allocation, blinding of assessors and analysts, interpretation of results based on the intention-to-treat principle, and disclosure of protocol papers will reduce the risk of selection, measurement, reduction, and reporting bias.
- The non-blinding of allocation information to participants and care providers may increase the risk of performance bias.
- The generalisability of the study findings to non-Japanese populations is unclear.



## 1 INTRODUCTION

2 Frailty is defined as vulnerability of homeostatic responses to stressors due to  
3 cumulative age-related decline of physiological systems.[1] Research suggests that 7%  
4 and 47% of older adults have frailty and pre-frailty, respectively, and their risk of falls,  
5 disabilities, nursing home admission, and death is significantly higher than that of robust  
6 older adults.[2] Interventions to reduce frailty prevalence and severity may benefit older  
7 adults with care needs, their caregivers, and the public social insurance system. However,  
8 clinical trials involving older adults with frailty defined using validated assessment tools  
9 are required to confirm the effectiveness of these interventions.[1]

10 Interventions such as exercise and nutritional programmes are useful for reducing  
11 the prevalence of frailty, but stakeholders have raised concerns that research on these  
12 interventions has focused predominantly on improving physical outcomes.[3] Studies  
13 focusing on patient-reported outcomes (e.g. health-related quality of life [HR-QoL]) may  
14 address the gaps between scientific evidence and clinical practice.[4] Exercise  
15 interventions are reportedly the most effective for improving HR-QoL among older adults  
16 with frailty, but this warrants validation in robust clinical trials.[5] Nevertheless, evidence  
17 for the effects of home-based exercise interventions on HR-QoL remains scarce.[6] As  
18 older adults with frailty exhibit decreased mobility,[7] readily available home-based  
19 exercise programmes are feasible and rational interventions.

20 Radio-Taiso is the most famous Japanese exercise programme, with reports  
21 suggesting that approximately 96.9% of the national population are aware it.[8] In 1928,  
22 the Postal Life Insurance Bureau of the Ministry of Communications (successor agency:  
23 Japan Post Insurance Co., Ltd.) developed Radio-Taiso as a “National Health Exercise”  
24 to improve health among Japanese people.[9] Radio-Taiso is customarily practiced in  
25 numerous settings and is firmly established in Japanese culture (Figure 1).[10] It is  
26 broadcasted daily by the Japan Broadcasting Corporation via public radio and television,  
27 thus facilitating home access by Japanese older adults with frailty.

28 Our recent pilot randomised controlled trial examined the feasibility and potential  
29 effectiveness of a home-based Radio-Taiso exercise programme in community-dwelling  
30 older adults with pre-frailty and frailty. Participants demonstrated high adherence and the  
31 results suggested that the programme may lead to clinically important improvements in  
32 the mental domain of HR-QoL (under review). However, the effectiveness of the  
33 programme remains to be validated by robust clinical trials.

34 This trial aims to test whether older adults with pre-frailty and frailty who undergo  
35 the programme will experience greater benefits in the mental domain of HR-QoL  
36 compared to those who do not undergo the programme. Further, the trial aims to identify

1 the mechanisms underlying programme effectiveness and the impact of the programme  
2 on participants' lifestyles (Figure 2).

## 3 4 **METHODS AND ANALYSIS**

### 5 **Study design, setting, and procedures**

6 This is a 12-week randomised, assessor-blind, parallel-design, two-arm, phase III  
7 trial. The protocol was designed in accordance with the SPIRIT statement  
8 (Supplementary Material 1) and several aspects of the SPIRIT-PRO Extension.

9 All outcomes will be assessed at the Tokyo Metropolitan Institute of Gerontology  
10 (TMIG) in Itabashi-ku, Tokyo, Japan. Participants will practice the programme at home.  
11 Six face-to-face group sessions will be conducted at the TMIG or nearby community  
12 facilities (Figure 3). Recruitment will be conducted in April 2022. Informed consent will  
13 be obtained in the subsequent month (May 2022). Baseline and follow-up assessments  
14 will be conducted in June and September 2022, respectively. After baseline assessments,  
15 participants who meet the eligibility criteria will be included in the trial and randomly  
16 assigned to the intervention (home-based Radio-Taiso exercise programme + nutrition  
17 programme) or control (nutrition programme) groups. The intervention will begin and  
18 end in June and September 2022, respectively.

### 19 20 **Participants**

21 Inclusion criteria are: 1) aged 65 years or older; and 2) frailty or pre-frailty, as  
22 defined by the revised Japanese version of the Cardiovascular Health Study (J-CHS)  
23 criteria (see below).

24 Exclusion criteria are: 1) inability to participate in both baseline and follow-up  
25 assessments; 2) diagnosed with dementia or prescribed anti-dementia drugs; 3) self-  
26 reports of being unable to eat, excrete, dress, move, or bathe independently; 4) not  
27 allowed to exercise (except for light-intensity exercise) by the family physician; 5)  
28 unstable/severe medical conditions that prevent trial physicians from permitting study  
29 participation; 6) angina pectoris, myocardial infarction, or cardiac surgery in the past 3  
30 months, having a terminal illness, or receiving palliative care; 7) practising Radio-Taiso  
31 exercises for  $\geq 1$  day/week for the past month; 8) participating in a specific rehabilitation  
32 programme; 9) unable to walk  $\geq 10$  m independently; 10) participating or will participate  
33 in other clinical trials; 11) lacking a television at home; 12) difficulty communicating in  
34 Japanese; 13) deemed by the principal investigator and/or trial physicians to be ineligible;  
35 and 14) unable to provide consent to participate.

36 Potential participants will be recruited from a large database of trial-ready cohorts

1 managed by the TMIG. In our pilot trial in 2020, 902 individuals were newly enrolled or  
2 had their information updated. Of these, 514 (60%) met the pre-frailty or frailty criteria  
3 and 186 (recruitment rate: 20.6%) met all eligibility criteria and were willing to  
4 participate. Thus, at least 1,097 new registrations or updates are required to ensure that  
5 the target number of 226 participants is reached (described in more detail in the sample  
6 size section).

7 Invitation letters and eligibility criteria checklists will be sent to individuals  
8 diagnosed with frailty or pre-frailty between October 2021 and March 2022. Participants  
9 who meet all eligibility criteria and intend to participate will be provided a detailed verbal  
10 explanation of the study (i.e. aims, procedures, confidentiality, possible benefits and  
11 disadvantages, anticipated risks, and methods to address risks). Only individuals who  
12 provide written informed consent will participate. If more individuals are willing to  
13 participate than the target sample size, participants will be randomly selected using a  
14 computer-generated random sequence. During baseline assessments, trial physicians will  
15 assess compliance with exclusion criteria numbered 2, 5, and 6.

### 17 **Allocation and blinding**

18 After baseline assessments, participants will be randomly allocated to the  
19 intervention and control groups at a 1:1 ratio. The sequence for generating the allocation  
20 code will be stratified by sex (male or female), age (<75 or ≥75 years), and frailty severity  
21 (pre-frail or frailty). Block randomisation will be applied.

22 The principal investigator (YO) at the TMIG will send identification codes of  
23 eligible participants to an allocator (KM) who has no contact with participants. KM will  
24 combine the codes with a prescribed randomisation code, which will be generated prior  
25 to baseline assessments. An independent research staff member will inform participants  
26 of their group based on the allocation code sent by KM. Group labels will not be disclosed  
27 to the assessor and statistical analyst until completion of the primary analysis.

### 29 **Intervention**

30 During the 12-week intervention period, participants will be instructed to avoid  
31 starting new exercise or nutrition programmes. To address the ethical disadvantages of  
32 the control group, a nutrition programme will be provided to both groups.

#### 34 Home-based Radio-Taiso exercise programme

35 Radio-Taiso includes three exercise patterns: Radio-Taiso No. 1 and 2 and Minna  
36 no Taiso. These patterns comprise 8–13 rhythmic whole-body movements with music.

1  
2  
3  
4  
5  
6 1 Each pattern starts with a low-intensity movement, gradually increases in intensity, and  
7 2 ends with another low-intensity movement, allowing safe practice. The smooth execution  
8 3 of movements requires fitness in various physical domains (strength, flexibility,  
9 4 endurance, and balance), making Radio-Taiso a multi-component exercise programme  
10 5 (details in Supplementary Tables 1–3).

11 6 The home-based programme comprises six 60-min face-to-face group sessions  
12 7 with a certified instructor from the Japan Radio-Taiso Federation and daily practice in  
13 8 participants' homes. Before the programme, the intervention group will receive a face-to-  
14 9 face group session on correctly performing the three exercise patterns. In the first 4 weeks  
15 10 of the intervention, participants will receive face-to-face group sessions on effectively  
16 11 performing the exercise programmes. In week 8, a face-to-face group session will be  
17 12 provided to review the key points of each exercise programme.

18 13 Participants will be instructed to complete a three-pattern exercise programme  
19 14 once daily at home by themselves via a broadcast by the Japan Broadcasting Corporation  
20 15 or on DVD. If the participants feel unwell while performing any exercise or feel that the  
21 16 exercise intensity is too high, they will be instructed to stop or reduce the number of  
22 17 sessions. Participants will be required to record (1) whether they performed the exercise  
23 18 programme and (2) compliance with key points for effective programme implementation  
24 19 in an exercise diary. On the day of face-to-face group sessions, research staff will check  
25 20 the exercise diary, adverse events, and participation in the new rehabilitation programme.  
26 21 In weeks when sessions are not provided, these details will be checked by telephone every  
27 22 fortnight.

28 23 The pilot trial confirmed good adherence to the home-based Radio-Taiso exercise  
29 24 programme (retention rate: 100%; median [interquartile range] practice rate: 97.6%  
30 25 [88.1%–98.8%]). However, no trend towards improvements in physical outcomes was  
31 26 observed. Radio-Taiso may not include properties that significantly improve physical  
32 27 outcomes because it predominately consists of flexibility exercises. However, thoroughly  
33 28 completing the purpose of each movement in Radio-Taiso necessitates quicker and larger  
34 29 movements, which require muscle endurance and whole-body endurance. In this regard,  
35 30 several participants who received face-to-face instructions in the pilot study reported that  
36 31 it is important to understand the purpose of each movement of the Radio-Taiso via face-  
37 32 to-face instructions to improve the quality of practice at home. Thus, to provide  
38 33 participants with a programme that yields better physical outcomes, the number of face-  
39 34 to-face sessions will be increased from three to six and include processes that help  
40 35 participants familiarise with the key points of the programme. An item will be added to  
41 36 the exercise diary to check compliance with these points.

## Nutrition programme

The nutrition programme comprises: 1) distribution of a nutrition leaflet; 2) recording of a dietary variety score; and 3) telephonic nutrition counselling. One week before intervention onset, participants will receive a face-to-face briefing from a dietitian on programme implementation. A nutrition leaflet will be distributed once weekly during the first 4 weeks of the intervention, detailing the nutritional role and recommended intake amounts of protein, calcium, vitamins/minerals, and carbohydrates/fats, alongside specific recipes for the efficient intake of these nutrients. Participants will be instructed to record daily in a nutrition diary the consumption of 10 food groups (meat, seafood, eggs, soya and soya products, milk, green and yellow vegetables, seaweed, potatoes, fruit, and oil) using a dietary variety score. Participants will be requested to provide scores on intake of these food groups on a 10-point scale.[11] A high dietary variety score has been associated with lower frailty severity.[12] Participants will be allowed to call the dietitian 1 day per week to discuss how to proceed with the nutrition programme or to ask any questions.

## Outcome measures

The primary outcome is changes in the mental component summary (MCS) score of HR-QoL. Secondary outcomes are the physical component summary (PCS) score, role/social component summary (RCS) score, and eight subscales of HR-QoL as well as frailty phenotype, agility/dynamic balance, strength, flexibility, aerobic endurance, posture, attention, executive function, exercise self-efficacy, depressive symptoms, brain-derived neurotrophic factor (BDNF), social network, habitual energy intake, physical activity, sleep conditions, safety, and adherence. All outcomes excluding habitual physical activity will be assessed at a baseline survey within 2 weeks prior to the start of the intervention and at a follow-up survey within 1 week after the end of the intervention (Figure 3).

## Baseline information

Baseline information including age, sex, disease history (hypertension, heart disease, diabetes, hyperlipidaemia, osteoporosis, and respiratory disease), and low-back and knee pain will be obtained by face-to-face interview.

## Assessments

Objective outcomes including physical fitness, posture, cognition, BDNF, and

1 physical activity will be assessed by research staff blinded to allocation information.

## 2 3 HR-QoL

4 HR-QoL will be assessed using the Japanese version of the SF-36, which is a  
5 widely used, reliable, and validated tool.[13 14] The SF-36 measures eight health  
6 domains: physical function, physical role, body pain, general health, vitality, social  
7 function, emotional role, and mental health. These domains are aggregated and scored  
8 into the MCS, PCS, and RCS (Figure 2).[15] These scores are standardised as T-scores  
9 using the 2017 Japanese national norm.[16] A change of three or more points in the MCS  
10 or two or more points in the PCS constitutes a minimal clinically important difference,  
11 enabling clinical interpretation of changes in scores.[17]

## 12 13 Frailty phenotype

14 Frailty phenotype will be assessed using Fried's frailty criteria, characterised by  
15 five limitations: slowness, weakness, exhaustion, low activity, and weight loss.[2] The  
16 trial will use the revised J-CHS criteria to define frailty (three or more limitations) and  
17 pre-frailty (one or two limitations).[18]

### 18 19 *Slowness*

20 Slowness will be assessed based on usual gait speed. An 11 m walking path will  
21 be used, with a 3 m acceleration/deceleration path at each end. The assessor will measure  
22 the time taken between the 3- and 8-m markers.[19] The measurement will be performed  
23 once. Slowness will be defined as a gait speed of less than 1.0 m/sec.

### 24 25 *Weakness*

26 Weakness will be assessed based on grip strength using a handheld Smedley-type  
27 dynamometer. Participants will be instructed to grip the device as strongly as possible  
28 with their dominant hand in a standing position.[19] The measurement will be performed  
29 once. Weakness will be defined as less than 28 and 18 kg for men and women,  
30 respectively.

### 31 32 *Exhaustion*

33 Exhaustion will be assessed using question 25 of the Kihon checklist developed  
34 by the Ministry of Health, Labour and Welfare, as follows:[20] "In the last 2 weeks, have  
35 you felt tired for no reason?" Exhaustion will be defined as a "yes" response.

### 1 *Low activity*

2 Low activity will be assessed using two simple questions regarding participation  
3 in exercise or physical activity, as follows: 1) “How often do you engage in light intensity  
4 exercise or calisthenics?” and 2) “How often do you engage in exercise or sports  
5 activities”? Low activity will be defined by a response of “less than once a week” to both  
6 questions.

### 7 *Weight loss*

8 Weight loss will be assessed using question 11 of the Kihon checklist developed  
9 by the Ministry of Health, Labour and Welfare, as follows:[20] “Have you lost 2 kg or  
10 more in the past 6 months?” Weight loss will be defined as a “yes” response.  
11

### 12 *Physical fitness*

13 Six physical fitness domains (agility/dynamic balance, lower body strength, upper  
14 body strength, lower body flexibility, upper body flexibility, and aerobic endurance) will  
15 be assessed using Senior Fitness Tests.[21]  
16

### 17 *Agility and dynamic balance*

18 Agility and dynamic balance will be assessed using the 8-foot up-and-go test.  
19 Participants will be instructed to stand up at the start signal, walk around a cone 8 ft away,  
20 turn around, and sit down again. This sequence must be performed as quickly as possible.  
21 After one practice session, two trials will be performed. The values for the minimum time  
22 required will be used in the analysis.  
23

### 24 *Lower body strength*

25 Lower body strength will be assessed using the chair stand test. At test onset,  
26 participants will be instructed to stand up and sit down again with their arms crossed in  
27 front of the chest. After 2–3 practice sequences of this exercise, a single trial will be  
28 performed, in which the sequence is repeated as quickly as possible for 30 s. The number  
29 of sequences achieved will be used in the analysis.  
30

### 31 *Upper body strength*

32 Upper body strength will be assessed using the arm curl test. Participants will be  
33 requested to flex and extend the elbow of the dominant arm while holding a dumbbell (8  
34 lb for men and 5 lb for women) at the start signal, with both upper arms in a natural down  
35 position. After 2–3 practice sequences, a single trial will be performed, in which the  
36

1 sequence will be repeated as quickly as possible for 30 s.

### 2 3 *Lower body flexibility*

4 Lower body flexibility will be assessed using the chair sit-and-reach test.  
5 Participants will be requested to sit in a shallow position on a chair and extend their  
6 favourite leg. Participants will then be instructed to place the fingertips of both hands  
7 together, slowly flex the upper body towards the toes of the favourite leg until reaching  
8 their limit, and remain still for 2 s. Participants will be instructed to hold the ankle joint  
9 at 90°. The assessor will measure the distance between the toes of the favourite leg and  
10 fingertips of both hands using a ruler. After two practice sessions, the measurements will  
11 be performed twice. The best values will be used in the analysis.

### 12 13 *Upper body flexibility*

14 Upper body flexibility will be assessed using the back scratch test. In an upright  
15 position, the participant will be instructed to rotate the favourite hand backwards  
16 obliquely upward and the other hand backwards obliquely downward to the posterior  
17 region. The assessor will measure the shortest distance between the middle fingers of both  
18 hands using a ruler. The measurement will be performed twice. The best values will be  
19 used in the analysis.

### 20 21 *Aerobic endurance*

22 Aerobic endurance will be assessed using a 2-min step-in-place test. The assessor  
23 will mark a wall with masking tape midway between the participant's patella and iliac  
24 crest. The participant will be instructed to stand next to the wall and march in place for 2  
25 min. Participants who face difficulties marching for the 2 min will be allowed to take a  
26 break and hold the wall or a stable chair. The assessor will record the number of times the  
27 right knee reaches the marker within 2 minutes. The trial will be conducted once.

### 28 29 *Anthropometric indices*

#### 30 *Height, body weight, and body mass index*

31 Height will be measured using a digital height meter (DSN-70; MURATEC-KDS  
32 Corporation, Kyoto, Japan). Body weight is measured using a body composition analyser  
33 (InBody770, InBody Co. Ltd., Seoul, Korea). Body mass index is calculated by dividing  
34 the weight (kg) by the square of the height (m).

#### 35 *Posture*

36 Posture will be assessed by the degree of kyphosis and the range of motion of the



1 spine. The degree of kyphosis is assessed by the thoracic kyphosis angle (KA) and lumbar  
2 lordosis angle.[22 23]

3 Thoracic KA and lumbar lordosis angles are measured using the Idiag M360  
4 (Idiag AG, Switzerland). The participant is first instructed to stand in a normal position,  
5 and then the assessor moves the Idiag M360 along the spinous processes from the vertebra  
6 prominens (C7) to the third cervical vertebra (C3). The trial is conducted once, and the  
7 smaller the angle of the thoracic KA, the severer the kyphosis, whereas the larger the  
8 lumbar lordosis angle, the severer the kyphosis.[22 23]

9 The range of motion of the spine is measured using the Idiag M360 (Idiag AG,  
10 Switzerland).[22 23] The assessor moves the Idiag M360 over the spinous processes from  
11 C7 to C3 in the maximum forward flexion and extension positions. Range of motion is  
12 assessed as the difference between the thoracic KA and lumbar lordosis angle at  
13 maximum forward flexion and maximum extension, based on the angles measured for the  
14 thoracic KA and lumbar lordosis angle.

## 15 16 Cognition

17 Attention and executive function will be assessed using Parts A and B of the trail  
18 making test (TMT).[24] In Part A, participants must connect the numbers in ascending  
19 order, and the time taken for finalising the task is measured (i.e. 1-2-3-4...). In Part B, the  
20 task is to connect the numbers and kana characters in an alternating order (i.e. 1-A-2-I...),  
21 and the time taken to finalise the task is measured.

## 22 23 Home-based exercise self-efficacy

24 The participants' home-based exercise self-efficacy will be assessed using the  
25 Home-Exercise Barrier Self-Efficacy Scale.[25] Participants will be asked to respond to  
26 six exercise situations at home (1: when I am tired, 2: when I am in pain, 3: when I do not  
27 feel very good, 4: when I do not have time, 5: when I do not have the equipment or  
28 environment to exercise, 6: when I am alone) on a 5-point Likert scale ranging from 1  
29 (*not at all confident*) to 5 (*absolutely confident*). Details on items and scoring are  
30 described in prior research.[25] Total scores range from 6–30, with higher scores  
31 indicating greater self-efficacy in home-based exercise.

## 32 33 Depressive symptoms

34 Depressive symptoms will be assessed using the short version of the Geriatric  
35 Depression Scale.[26] Participants will be asked to answer to 15 yes-or-no questions  
36 about their daily mood. Details on items and scoring are described in prior research.[26]

1  
2  
3  
4  
5  
6 1 Total scores range from 0–15, with higher scores indicating a more depressed mood.  
7 2

8  
9 3 BDNF

10 4 BDNF is the most widely expressed neurotrophin in the mammalian brain and an  
11 5 important regulator of the development and function of neural circuits in the brain.[27]  
12 6 Exercise-induced BDNF mediates neuronal differentiation and growth, synapse  
13 7 formation and plasticity, and may explain how exercise training improves mental health  
14 8 and cognitive function.[28]

15 9 Participants will fast for at least two hours and a blood sample will be collected from the  
16 10 anterior elbow vein. To exclude the potential effects of acute exercise, participants will  
17 11 be asked to refrain from engaging in vigorous intensity exercise for 36 hours before the  
18 12 blood sample collection. To control for diurnal variation, participants will have their  
19 13 blood drawn at the same time of day in both the baseline and follow-up assessments.  
20 14 Blood samples will be processed according to the manufacturer's specifications: plasma  
21 15 is obtained by centrifugation at 3,000 g for 10 min at 22°C, aliquoted, and stored at -80°C  
22 16 until measurement. Plasma samples will be assessed for BDNF concentrations using a  
23 17 commercially available two-site sandwich enzyme-linked immunosorbent assay kit  
24 18 (R&D Systems, Minneapolis, MN, USA). The analysis will be conducted centrally in an  
25 19 independent laboratory.  
26 20

27 21 Social network

28 22 Social network will be assessed using the Japanese version of the Lubben Social  
29 23 Network Scale-6 (LSNS-6).[29] Participants will answer six questions regarding support,  
30 24 indicating the number of family members and friends who can provide them with  
31 25 emotional and instrumental support from the five given options. Details on items/scoring  
32 26 are described in prior research.[29] Total scores range from 0–30, with higher scores  
33 27 indicating a larger social network.  
34 28

35 29 Habitual energy intake

36 30 Habitual energy intake will be assessed using a reliable and valid, brief, self-  
37 31 administered diet history questionnaire developed to provide a simple estimate of energy  
38 32 intake over the past month.[30 31] Participants will be asked to recall their average dietary  
39 33 habits over the past month and indicate the frequency of consumption of each food item.  
40 34 Habitual energy intake will be calculated using special software provided by Gender  
41 35 Medical Research Co. Japan.  
42 36

## Habitual physical activity

Habitual physical activity levels will be assessed based on the average number of daily steps taken. The number of steps will be measured using validated tri-axis accelerometers and algorithms (Active style Pro HJA-750C; Omron Healthcare, Tokyo, Japan).[32 33] Participants will be instructed to wear the device around the waist for 7 days from baseline to follow-up assessments during all activities of daily living, from waking to bedtime, except for underwater activities (e.g. bathing and swimming). A record is valid if the device is worn for at least 10 h/day.[34] If valid records are collected for more than three days, the number of daily steps is calculated.

## Habitual sleep conditions

Sleep conditions will be subjectively assessed using the Japanese version of the Pittsburgh Sleep Quality Index,[35 36] comprising seven components: sleep quality, time to fall asleep, time stayed asleep, sleep efficiency, difficulty sleeping, use of sleeping pills, and difficulty waking up during the day in the past month. Details on items and scoring are described in prior research.[35 36] Total scores range from 0–21, with higher scores indicating a worse subjective sleep condition.

## Adverse events

Adverse events are defined in this study as any undesirable/unintended sign, symptom, or disease occurring during the intervention, regardless of causality. The number of adverse events that occur during the intervention period will be assessed. Trial physicians will determine adverse event severity and potential relevance to the intervention. Any adverse events (e.g. subjective symptoms, falls, and other surgical or medical findings) suspected to be related to the intervention will be recorded. Every fortnight, research staff will ask participants, telephonically or in person, whether they have experienced an adverse event.

## Adherence

Adherence will be assessed via the retention rate during the intervention period and the rate of practice of the Radio-Taiso exercise programme. The retention rate will be calculated as the percentage of participants who complete the follow-up assessment. The rate of practice of the programme will be calculated by dividing the number of practice days (days when the exercises are practiced at least once a day) by 84 days. The total number of practice sessions of the programme will also be assessed.

## 1 **Sample size**

2           Based on the pilot trial, the effect size (Cohen's *d*) of the programme on the MCS  
3 score is 0.395. Using G\*Power version 3.1.9.2 for Windows (Heinrich-Heine-Universität  
4 Düsseldorf, Germany),[37] with the alpha error set at 5%, a power of 80%, and this effect  
5 size, the sample required is 204. Considering a 10% drop-out rate, the target sample is  
6 226.

## 7 **Data management**

8           Data quality control comprises 1) measurements based on established standard  
9 operating procedures, 2) manual checks (visual checks) of questionnaires and case reports,  
10 and 3) data entry using the double-entry method. Manual checks include confirmation of  
11 compliance with eligibility criteria, missing measurements, and value ranges. After  
12 entering all the data, the person responsible for the analysis will perform logical checks  
13 (programming checks) and data coding to ensure and fix any issues pertaining to data  
14 quality. These checks include examining for outliers.

## 15 **Statistical analysis**

16           As “tests of baseline homogeneity” in randomised controlled trials do not have  
17 any practical value,[38] comparison of baseline characteristics will not be performed in  
18 this study. At baseline, continuous variables are presented as means (standard deviations)  
19 or medians (interquartile ranges), and categorical variables as *n* (%).

## 20 **Main analysis**

21           To test programme effectiveness, changes in the primary outcome will be  
22 compared between the groups using an ANCOVA model adjusted for allocation  
23 stratification factors and baseline values. Changes in secondary outcomes will be  
24 compared using the same model. Differences between groups in the change of each  
25 outcome will be expressed as differences in adjusted means (95% confidence intervals).  
26 Statistical significance will be set at a  $P < 0.05$ .

27           The results of the main analyses will be interpreted based on the intention-to-treat  
28 principle. The full analysis set will exclude participants 1) who are subsequently found  
29 not to meet the eligibility criteria; 2) who never participated in the intervention  
30 programme; or 3) for whom no post-randomisation data are available;[39] the resulting  
31 sample will be applied as the main analysis population. The International Council for  
32 Harmonisation guideline recommends applying a full analysis set that excludes these  
33 participants from the main analyses as a conservative strategy.[39]

## Additional analyses

Additional analyses using a per-protocol set will be conducted to assess the extent to which adherence affects the results. The per-protocol set will include participants who have practiced at least 75% of the stipulated home-based Radio-Taiso exercises.[40]

A sensitivity analysis will be performed to assess heterogeneity owing to missing follow-up data (missing data bias). Missing data will be processed through multiple imputation by applying the chained equation method to generate 20 imputed datasets based on the outcome, allocation, and group variables at baseline.

To assess study generalisability, subgroup analyses will be conducted based on participants' background data (male vs female, <75 vs ≥75 years of age, and frailty vs pre-frailty).

Retention rates and the incidence of adverse events (one or more for those who report them) will be compared between groups using Fisher's exact test or the  $\chi$ -square test. All analyses will be carried out using R version 4.1.2 or higher (The R Foundation for Statistical Computing, Vienna, Austria).

## Patient and public involvement

This study will be conducted without participant involvement. Participants will not be invited to comment on study design, define relevant outcomes, or interpret the results, nor contribute to the writing or editing of this paper for readability or accuracy.

## ETHICS AND DISSEMINATION

The research protocol will be conducted in accordance with the Declaration of Helsinki. The Research Ethics Committee of TMIG approved the protocol on 16 December 2021. The study protocol was registered with the University Hospital Medical Information Network Clinical Trials Registry (UMIN-CTR) on 20 March 2022 (trial registration no. UMIN000047229). All amendments to the study protocol will be disclosed to UMIN-CTR.

Study results will be presented at an international scientific conference and reported in a peer-reviewed international journal. After publication, a summary of the results will be published on the TMIG and Japan Post Insurance Co., Ltd. websites.

## DISCUSSION

Few trials have examined the effect of exercise interventions on HR-QoL in older adults with frailty, diagnosed with validated assessment tools.[3 5 6] Thus, this robustly

1  
2  
3  
4  
5  
6 1 designed trial will strengthen the evidence needed for or against the effectiveness of  
7 2 home-based exercise programmes on HR-QoL. International health policy bodies,  
8 3 regulators, and patients are increasingly recognising the importance of patient-reported  
9 4 outcomes, including HR-QoL, for health.[41] The results of this study will provide  
10 5 valuable insights that may serve to address the evidence and clinical practice gaps  
11 6 associated with care programmes for older adults with frailty. This study will also  
12 7 contribute to a better understanding of the potential mechanisms by which home-based  
13 8 exercise programmes can improve HR-QoL, by analysing various secondary outcomes.

9  
10 9 Researchers have systematically compared HR-QoL between frailty and non-  
11 10 frailty groups, showing a moderate or greater standardised mean difference between the  
12 11 groups and that the frailty group had a worse HR-QoL.[42] The measures to curb the  
13 12 COVID-19 pandemic also limit the life-space mobility of older adults with frailty and  
14 13 have a significant impact on QoL.[43] Patient-reported outcomes from clinical trials using  
15 14 scientifically robust methodologies are reflected in clinical decision-making and  
16 15 influence health and social care policy.[41] Thus, if this study helps to clarify the  
17 16 effectiveness of the proposed programme on HR-QoL, this may enable invested  
18 17 stakeholders to develop a policy framework for care programmes of older adults with  
19 18 frailty.

20 19 For a care programme targeting people with frailty to be implemented in public  
21 20 health policy, it must be accessible (i.e. low cost and high acceptability/availability) and  
22 21 be delivered equitably and continuously.[4] A care programme that draws on existing  
23 22 cultural and social resources may be able to meet these requirements. In Japan, the Radio-  
24 23 Taiso exercise programme has a long history of being customarily watched in different  
25 24 settings and is familiar to many older adults; thus, it is a cultural exercise programme in  
26 25 the country.[10] In fact, our pilot trial confirmed that adherence to the programme is very  
27 26 high and that it is highly compatible with daily life. Radio-Taiso is also available at low  
28 27 cost to everyone via television/radio on a daily basis. To date, more than 24,600 certified  
29 28 Radio-Taiso instructors have been trained, and the programme is practised nationwide at  
30 29 more than 2,000 regional bases.[44] Rich in cultural and social resources, the Radio-Taiso  
31 30 exercise programme may serve as a socially implementable public health strategy.

32 31 This study has several limitations. First, although the study addresses  
33 32 measurement, attrition, and reporting bias, participants and treatment providers will not  
34 33 be blinded to allocation information; this increases the risk of performance bias and  
35 34 reduces effect estimation accuracy. Second, calisthenic programmes such as Radio-Taiso  
36 35 are popular in some countries, such as China, Korea, and Scandinavian countries, but it  
37 36 remains unclear to what extent the usefulness of the Radio-Taiso exercise programmes is

1 generalisable to non-Japanese older adults with frailty.

### 2 **Acknowledgments**

3 We are grateful to the participants and the staff members of the TMIG.

### 4 **Author contributions**

5  
6 Yosuke Osuka: study concept and design, data collection and interpretation, manuscript  
7 preparation. Narumi Kojima: study concept and design, data collection and interpretation,  
8 manuscript preparation. Masamitsu Sugie: study concept and design, safety assessment,  
9 manuscript preparation. Takuya Omura: study concept and design, safety assessment,  
10 manuscript preparation. Keiko Motokawa: study concept and design, data collection and  
11 interpretation, manuscript preparation. Takuya Ueda: study concept and design, data  
12 collection and interpretation, manuscript preparation. Kazushi Maruo: study concept and  
13 design, statistical advice, randomisation, data interpretation, manuscript preparation. Risa  
14 Ono: study concept and design, intervention, data interpretation, manuscript preparation.  
15 Toshihiko Aoyama: study concept and design, data interpretation, manuscript preparation.  
16 Shigeru Inoue: study concept and design, data interpretation, manuscript preparation.  
17 Hunkyung Kim: study concept and design, data interpretation, manuscript preparation.  
18 Hiroyuki Sasai: study concept and design, analysis, data interpretation, manuscript  
19 preparation.

### 20 **Funding**

21  
22 This study will be conducted under a collaborative agreement between four institutions  
23 (TMIG, Tokyo Medical University, Japan Post Insurance Co., Ltd., and the Japan Radio-  
24 Taiso Federation). Japan Post Insurance Co., Ltd. will financially support the study and  
25 will provide the Radio-Taiso DVD free of charge but will not be involved in the design  
26 of the study, selection of methods, recruitment of participants, data collection, analysis  
27 and interpretation, or writing of the manuscript.

28  
29 The Japan Radio-Taiso Federation will provide certified Radio-Taiso instructors free of  
30 charge and will be involved in the design of the study, intervention, data interpretation,  
31 and writing of the manuscript.

### 32 **Competing interests**

33  
34 Yosuke Osuka is the principal investigator of a joint research agreement between the four  
35 organisations; Risa Ono and Toshihiko Aoyama are accredited instructors for the Japan  
36 Radio-Taiso Federation. Japan Post Insurance Co., Ltd. and the Japan Radio-Taiso

1 Federation are committed to the promotion and dissemination of Radio-Taiso. The other  
2 authors have no conflicts of interest to declare.

### 3 4 **Patient consent**

5 Patient consent forms are attached in Supplementary Material 2

### 6 7 **Ethics approval**

8 Approved by the Research Ethics Committee of TMIG on 16 December 2021.

### 9 10 **Data availability statement**

11 Data are available upon reasonable request.

### 12 13 **REFERENCES**

- 14 1. Clegg A, Young J, Iliffe S, et al. Frailty in elderly people. *Lancet* 2013;381(9868):752-  
15 62.
- 16 2. Fried LP, Tangen CM, Walston J, et al. Frailty in older adults: evidence for a phenotype.  
17 *The Journals of Gerontology Series A, Biological Sciences and Medical Sciences*  
18 2001;56(3):M146-56.
- 19 3. Puts MTE, Toubasi S, Andrew MK, et al. Interventions to prevent or reduce the level  
20 of frailty in community-dwelling older adults: a scoping review of the literature  
21 and international policies. *Age and Ageing* 2017;46(3):383-92.
- 22 4. Dent E, Martin FC, Bergman H, et al. Management of frailty: opportunities, challenges,  
23 and future directions. *Lancet* 2019;394(10206):1376-86.
- 24 5. Negm AM, Kennedy CC, Thabane L, et al. Management of frailty: a systematic review  
25 and network meta-analysis of randomized controlled trials. *J Am Med Dir Assoc*  
26 2019;20(10):1190-98.
- 27 6. Clegg AP, Barber SE, Young JB, et al. Do home-based exercise interventions improve  
28 outcomes for frail older people? Findings from a systematic review. *Reviews in*  
29 *Clinical Gerontology* 2012;22(1):68-78.
- 30 7. Navarrete-Villanueva D, Gómez-Cabello A, Marín-Puyalto J, et al. Frailty and physical  
31 fitness in elderly people: a systematic review and meta-analysis. *Sports Med*  
32 2021;51(1):143-60.
- 33 8. Japan Post Insurance Co., Ltd. Recognition and participation rates for "Radio-Taiso".  
34 2021 [Available from: [https://www.jp-](https://www.jp-life.japanpost.jp/information/assets/pdf/211011pr-6-2.pdf)  
35 [life.japanpost.jp/information/assets/pdf/211011pr-6-2.pdf](https://www.jp-life.japanpost.jp/information/assets/pdf/211011pr-6-2.pdf) accessed March 10  
36 2022.



- 1 9. Public Relations Office, Government of Japan. Higlighting Japan 2019 [14-15].  
2 Available from: [https://dwl.gov-](https://dwl.gov-online.go.jp/video/cao/dl/public_html/gov/book/hlj/20191001/html5.html#page=15137)  
3 [online.go.jp/video/cao/dl/public\\_html/gov/book/hlj/20191001/html5.html#page=](https://dwl.gov-online.go.jp/video/cao/dl/public_html/gov/book/hlj/20191001/html5.html#page=15137)  
4 [15137](https://dwl.gov-online.go.jp/video/cao/dl/public_html/gov/book/hlj/20191001/html5.html#page=15137).
- 5 10. British Broadcasting Corporation. The lifelong exercise that keeps Japan moving.  
6 2020 [Available from: [https://www.bbc.com/worklife/article/20200609-the-life-](https://www.bbc.com/worklife/article/20200609-the-life-long-exercise-that-keeps-japan-moving)  
7 [long-exercise-that-keeps-japan-moving](https://www.bbc.com/worklife/article/20200609-the-life-long-exercise-that-keeps-japan-moving) accessed March 10 2022.
- 8 11. Kumagai S, Watanabe S, Shibata H, et al. [Effects of dietary variety on declines in  
9 high-level functional capacity in elderly people living in a community]. *Nihon*  
10 *Koshu Eisei Zasshi* 2003;50(12):1117-24.
- 11 12. Motokawa K, Watanabe Y, Edahiro A, et al. Frailty Severity and Dietary Variety in  
12 Japanese Older Persons: A Cross-Sectional Study. *J Nutr Health Aging*  
13 2018;22(3):451-56.
- 14 13. Fukuhara S, Bito S, Green J, et al. Translation, adaptation, and validation of the SF-  
15 36 Health Survey for use in Japan. *Journal of Clinical Epidemiology*  
16 1998;51(11):1037-44.
- 17 14. Fukuhara S, Ware JE, Jr., Kosinski M, et al. Psychometric and clinical tests of validity  
18 of the Japanese SF-36 Health Survey. *Journal of Clinical Epidemiology*  
19 1998;51(11):1045-53.
- 20 15. Suzukamo Y, Fukuhara S, Green J, et al. Validation testing of a three-component  
21 model of Short Form-36 scores. *Journal of Clinical Epidemiology*  
22 2011;64(3):301-8.
- 23 16. Fukuhara S, Suzukamo Y. Manual of SF-36v2 Japanese version. Kyoto: iHope  
24 International Inc 2004, 2019.
- 25 17. Maruish ME. User's Manual for the SF-36v2 Health Survey: Quality Metric  
26 Incorporated 2011.
- 27 18. Satake S, Arai H. The revised Japanese version of the Cardiovascular Health Study  
28 criteria (revised J-CHS criteria). *Geriatr Gerontol Int* 2020;20(10):992-93.
- 29 19. Shinkai S, Watanabe S, Kumagai S, et al. Walking speed as a good predictor for the  
30 onset of functional dependence in a Japanese rural community population. *Age*  
31 *Ageing* 2000;29(5):441-6.
- 32 20. Sewo Sampaio PY, Sampaio RA, Yamada M, et al. Systematic review of the Kihon  
33 Checklist: Is it a reliable assessment of frailty? *Geriatrics & Gerontology*  
34 *International* 2016;16(8):893-902.
- 35 21. Rikli RE, Jones CJ. Development and validation of a functional fitness test for  
36 community-residing older adults. *J Aging Phys Act* 1999;7(2):129-61.

- 1  
2  
3  
4  
5  
6 1 22. Mannion AF, Knecht K, Balaban G, et al. A new skin-surface device for measuring  
7 2 the curvature and global and segmental ranges of motion of the spine: reliability  
8 3 of measurements and comparison with data reviewed from the literature. *Eur*  
9 4 *Spine J* 2004;13(2):122-36.
- 10 5 23. Post RB, Leferink VJ. Spinal mobility: sagittal range of motion measured with the  
11 6 SpinalMouse, a new non-invasive device. *Arch Orthop Trauma Surg*  
12 7 2004;124(3):187-92.
- 13 8 24. Army Individual Test Battery. Washington, DC: War Department: Adjutant General's  
14 9 Office 1944.
- 15 10 25. Arita N, Takenaka K, Shimazaki T. Development of a home-exercise barrier self-  
16 11 efficacy scale for elderly people requiring support and care. *Journal of the*  
17 12 *Japanese Physical Therapy Association* 2014;41(6):338-46.
- 18 13 26. Yatomi N. The factor structure and item characteristic of the GDS (Geriatric  
19 14 Depression Scale) short version in a Japanese elderly sample. *Japanese Journal*  
20 15 *of Gerontology* 1994;16(1):29-36.
- 21 16 27. Park H, Poo MM. Neurotrophin regulation of neural circuit development and function.  
22 17 *Nat Rev Neurosci* 2013;14(1):7-23.
- 23 18 28. Knaepen K, Goekint M, Heyman EM, et al. Neuroplasticity - exercise-induced  
24 19 response of peripheral brain-derived neurotrophic factor: a systematic review of  
25 20 experimental studies in human subjects. *Sports Med* 2010;40(9):765-801.
- 26 21 29. Kurimoto A, Awata S, Ohkubo T, et al. [Reliability and validity of the Japanese  
27 22 version of the abbreviated Lubben Social Network Scale]. *Nihon Ronen Igakkai*  
28 23 *Zasshi* 2011;48(2):149-57.
- 29 24 30. Kobayashi S, Murakami K, Sasaki S, et al. Comparison of relative validity of food  
30 25 group intakes estimated by comprehensive and brief-type self-administered diet  
31 26 history questionnaires against 16 d dietary records in Japanese adults. *Public*  
32 27 *Health Nutrition* 2011;14(7):1200-11.
- 33 28 31. Kobayashi S, Honda S, Murakami K, et al. Both comprehensive and brief self-  
34 29 administered diet history questionnaires satisfactorily rank nutrient intakes in  
35 30 Japanese adults. *Journal of Epidemiology* 2012;22(2):151-9.
- 36 31 32. Oshima Y, Kawaguchi K, Tanaka S, et al. Classifying household and locomotive  
37 32 activities using a triaxial accelerometer. *Gait Posture* 2010;31(3):370-4.
- 38 33 33. Ohkawara K, Oshima Y, Hikiyama Y, et al. Real-time estimation of daily physical  
39 34 activity intensity by a triaxial accelerometer and a gravity-removal classification  
40 35 algorithm. *Br J Nutr* 2011;105(11):1681-91.
- 41 36 34. Troiano RP, Berrigan D, Dodd KW, et al. Physical activity in the United States

- 1  
2  
3  
4  
5  
6 1 measured by accelerometer. *Medicine and Science in Sports and Exercise*  
7 2 2008;40(1):181-8.  
8  
9 3 35. Doi Y, Minowa M, Uchiyama M, et al. Psychometric assessment of subjective sleep  
10 4 quality using the Japanese version of the Pittsburgh Sleep Quality Index (PSQI-J)  
11 5 in psychiatric disordered and control subjects. *Psychiatry Research* 2000;97(2-  
12 6 3):165-72.  
13  
14 7 36. Doi Y, Minowa M, Okawa M, et al. Development of the Japanese version of the  
15 8 Pittsburgh Sleep Quality Index. *Japan Journal of Psychiatry Treatment*  
16 9 1998;13(6):755-63 (in Japanese).  
17  
18 10 37. Faul F, Erdfelder E, Lang AG, et al. G\*Power 3: a flexible statistical power analysis  
19 11 program for the social, behavioral, and biomedical sciences. *Behav Res Methods*  
20 12 2007;39(2):175-91.  
21  
22 13 38. Senn S. Testing for baseline balance in clinical trials. *Stat Med* 1994;13(17):1715-26.  
23  
24 14 39. The International Council for Harmonisation. E9 Statistical Principles for Clinical  
25 15 Trials: The International Council for Harmonisation; 1998 [Available from:  
26 16 [https://database.ich.org/sites/default/files/E9\\_Guideline.pdf](https://database.ich.org/sites/default/files/E9_Guideline.pdf) accessed October 16  
27 17 2021.  
28  
29 18 40. Hawley-Hague H, Horne M, Skelton DA, et al. Review of how we should define (and  
30 19 measure) adherence in studies examining older adults' participation in exercise  
31 20 classes. *BMJ Open* 2016;6(6):e011560.  
32  
33 21 41. Calvert M, Kyte D, Mercieca-Bebber R, et al. Guidelines for Inclusion of Patient-  
34 22 Reported Outcomes in Clinical Trial Protocols: The SPIRIT-PRO Extension.  
35 23 *JAMA* 2018;319(5):483-94.  
36  
37 24 42. Crocker TF, Brown L, Clegg A, et al. Quality of life is substantially worse for  
38 25 community-dwelling older people living with frailty: systematic review and meta-  
39 26 analysis. *Qual Life Res* 2019;28(8):2041-56.  
40  
41 27 43. Saraiva MD, Apolinario D, Avelino-Silva TJ, et al. The Impact of Frailty on the  
42 28 Relationship between Life-Space Mobility and Quality of Life in Older Adults  
43 29 during the COVID-19 Pandemic. *J Nutr Health Aging* 2021;25(4):440-47.  
44  
45 30 44. The Japan Radio-Taiso Federation. Information of certified instructors and regional  
46 31 bases. 2022 [Available from: <https://www.radio-exercises.org/> accessed March 10  
47 32 2022.  
48  
49  
50  
51  
52  
53  
54  
55

## 34 **FIGURE LEGENDS**

35 **Figure 1.** Pictures of Radio-Taiso as a firmly established, traditional Japanese exercise  
56  
57  
58  
59  
60 programme.

1  
2  
3  
4  
5  
6  
7  
8  
9  
10  
11  
12  
13  
14  
15  
16  
17  
18  
19  
20  
21  
22  
23  
24  
25  
26  
27  
28  
29  
30  
31  
32  
33  
34  
35  
36  
37  
38  
39  
40  
41  
42  
43  
44  
45  
46  
47  
48  
49  
50  
51  
52  
53  
54  
55  
56  
57  
58  
59  
60

1 A: Community-dwelling children get together to practice Radio-Taiso. B: Physical  
2 education classes. C: Practice in the workplace. D: Gathering and practising during  
3 community events. All pictures were provided by courtesy of Japan Post Insurance Co.,  
4 Ltd.

5 **Figure 2.** A conceptual model for explaining the mechanisms of the effect of the home-  
6 based Radio-Taiso exercise programme.

7 HR-QoL: health-related quality of life, PCS: physical component summary, MCS: mental  
8 component summary, and RCS: role/social component summary

9 **Figure 3.** Study flow diagram.

10 IC: informed consent, RT: Radio-Taiso



Figure 1. Pictures of the Radio-Taiso as a firmly established, traditional Japanese exercise programme.  
A: Community-dwelling children get together to practice Radio-Taiso. B: Physical education classes. C: Practice in the workplace. D: Gathering and practising during community events. All pictures are provided by courtesy of the Japan Post Insurance Co., Ltd.

169x166mm (330 x 330 DPI)

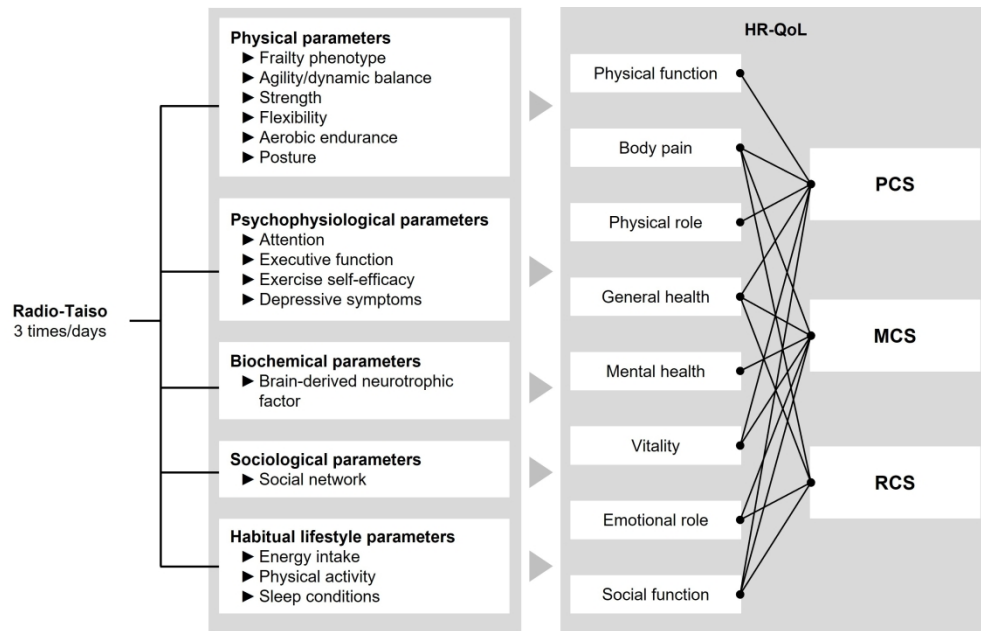

27 Figure 2. A conceptual model to explain the mechanisms of the effect of the home-based Radio-Taiso  
28 exercise programme. HR-QoL: health-related quality of life, PCS: physical component summary, MCS:  
29 mental component summary, and RCS: role/social component summary

30 255x160mm (330 x 330 DPI)

Figure 3. Study timeline of enrolment, interventions, and assessments.

| Study events           | Enrolment | IC  | Baseline assessment | Instruction | Intervention (84 days) |    |    |    |    |    |    |    | Follow-up assessment |
|------------------------|-----------|-----|---------------------|-------------|------------------------|----|----|----|----|----|----|----|----------------------|
| Days                   | -90       | -60 | 0                   | 7           | 14                     | 21 | 28 | 35 | 49 | 63 | 77 | 91 | 98                   |
| Allowance              | ±30       | ±3  | ±3                  | ±3          | ±3                     | ±3 | ±3 | ±3 | ±3 | ±3 | ±3 | ±3 | ±3                   |
| <b>ENROLMENT:</b>      |           |     |                     |             |                        |    |    |    |    |    |    |    |                      |
| Eligibility assessment | X         | X   | X                   |             |                        |    |    |    |    |    |    |    |                      |
| IC                     |           | X   |                     |             |                        |    |    |    |    |    |    |    |                      |
| Allocation             |           |     | X                   |             |                        |    |    |    |    |    |    |    |                      |
| <b>INTERVENTIONS:</b>  |           |     |                     |             |                        |    |    |    |    |    |    |    |                      |
| RT exercise program    |           |     |                     | X           | X                      | X  | X  | X  |    | X  |    |    |                      |
| Nutrition program      |           |     |                     | X           | X                      | X  | X  | X  |    |    |    |    |                      |
| <b>ASSESSMENTS:</b>    |           |     |                     |             |                        |    |    |    |    |    |    |    |                      |
| Baseline variables     |           |     | X                   |             |                        |    |    |    |    |    |    |    |                      |
| Outcome variables      |           |     | X                   |             |                        |    |    |    |    |    |    |    | X                    |
| Adverse events         |           |     |                     |             |                        | X  |    | X  | X  | X  | X  | X  |                      |

Supplementary Table 1. Radio-Taiso part 1 (3 min 10 sec)

|    | Movement                                                | Purpose                                                                                                                                                                                |
|----|---------------------------------------------------------|----------------------------------------------------------------------------------------------------------------------------------------------------------------------------------------|
| 1  | Stretch entire body                                     | Raising the arms and stretching the entire body helps to achieve better posture                                                                                                        |
| 2  | Swing the arms and bend the legs                        | Swinging the arms to the sides while bending and stretching the legs helps to stimulate blood circulation throughout the body                                                          |
| 3  | Arm rotations                                           | Rotating the arms in large circles helps to keep the shoulder joint flexible.                                                                                                          |
| 4  | Chest stretches                                         | Opening up the chest helps to correct posture and promote respiratory function.                                                                                                        |
| 5  | Bends to each side                                      | Bending the upper body to the side helps to maintain the flexibility of the spine to make lateral movements.                                                                           |
| 6  | Backward and forward bends                              | Stretching the back and abdomen helps to maintain the flexibility of the spine to make forward and backward movements.                                                                 |
| 7  | Body twists                                             | Twisting the body helps to stretch the muscles around the hips and maintain the flexibility of the spine to make rotational movements.                                                 |
| 8  | Stretch the arms up and down                            | Stretching the arms up and down quickly and powerfully helps to develop strength and instantaneous power.                                                                              |
| 9  | Bend the body downwards at an angle and chest stretches | Bending the body downwards helps to develop muscle flexibility from the back to the back of the legs. By opening the chest, posture is corrected and respiratory function is improved. |
| 10 | Whole-body rotation                                     | Rotating the upper body in a large circle helps to increase the flexibility of the entire spine, especially its lower back portion.                                                    |
| 11 | Jumps                                                   | Making rhythmic jumps helps to promote blood circulation throughout the body and increase leg strength.                                                                                |
| 12 | Swing the arms and bend the legs                        | Swinging the arms to the side and bending and stretching the legs together while being aware of                                                                                        |



breathing helps the person take time to organise their body, mind, and breath.

13 Deep breath

Breathing deeply while moving the arms widely helps bring the body back to a normal state.

---

URL: [https://www.youtube.com/watch?v=\\_YZZfaMGEOU](https://www.youtube.com/watch?v=_YZZfaMGEOU)

For peer review only

Supplementary Table 2. Radio-Taiso part 2 (3 min 5 sec)

|    | Movement                                              | Purpose                                                                                                                                                 |
|----|-------------------------------------------------------|---------------------------------------------------------------------------------------------------------------------------------------------------------|
| 1  | Shake the whole body                                  | Making light jumps helps to shake and relax the whole body and prepare it for the exercises.                                                            |
| 2  | Bend and stretch the arms and legs                    | Vigorously bending and stretching the arms and legs helps to promote blood circulation throughout the body.                                             |
| 3  | Open arms from the front and rotate                   | Opening and rotating of the arms helps to relax the muscles around the shoulder and increase the range of motion of the shoulder joint.                 |
| 4  | Chest stretches                                       | Opening up the chest helps to correct posture and promote respiratory function.                                                                         |
| 5  | Bends to each side                                    | Bending the upper body to the side helps to maintain the flexibility of the spine to make lateral movements.                                            |
| 6  | Backward and forward bends                            | Stretching the back and abdomen helps to maintain the flexibility of the spine to make forward and backward movements.                                  |
| 7  | Body twists                                           | Twisting the body helps to stretch the muscles around the hips and maintain the flexibility of the spine to make rotational movements.                  |
| 8  | One-legged jump and step exercise                     | Making jumps and steps with just one leg helps to increase muscle strength, instantaneous power in the legs, and blood circulation throughout the body. |
| 9  | Bend backwards with twist and bend downwards at angle | Twisting and bending the whole body helps to stretch the muscles of the torso and chest and increase flexibility.                                       |
| 10 | Tilt the body forward                                 | Moving the upper body up and down while leaning forward helps to strengthen the muscles of the back and achieve better posture.                         |
| 11 | Jumps                                                 | Making rhythmic jumps helps to promote blood circulation throughout the body and increase leg                                                           |

1  
2  
3  
4  
5 strength.

6 12 Swing the arms and bend the legs

Swinging the arms and bending the legs together while being aware of breathing helps the person  
7 to take some time to organise the body, mind, and breath.

8  
9 13 Deep breath

Breathing deeply while moving your arms widely helps to bring the body back to a normal state.

---

10  
11 URL: <https://www.youtube.com/watch?v=yi1TbzML2cU>

12  
13  
14  
15  
16  
17  
18  
19  
20  
21  
22  
23  
24  
25  
26  
27  
28  
29  
30  
31  
32  
33  
34  
35  
36  
37  
38  
39  
40  
41  
42  
43  
44  
45  
46

For peer review only

Supplementary Table 3. Minna no Taiso (4 min 30 sec)

|   | Movement                 | Purpose                                                                                                                                                                        |
|---|--------------------------|--------------------------------------------------------------------------------------------------------------------------------------------------------------------------------|
| 1 | Hands and arms exercises | Moving the hands and arms well promotes peripheral blood circulation and the development of a sense of movement.                                                               |
| 2 | Chest exercise           | Making chest movements helps to correct posture and improve respiratory function.                                                                                              |
| 3 | Upper body bounce        | Bouncing the entire body while bending the upper body helps to relax the whole body, promote blood circulation, and maintain chest flexibility.                                |
| 4 | Neck exercises           | Moving and stretching the neck helps to stretch the muscles from the neck to the shoulders and stimulate blood circulation in these areas.                                     |
| 5 | Moving quickly           | Quickly extending the arm while shifting the body weight helps to increase the instantaneous power of the whole body.                                                          |
| 6 | Leg and hip exercises    | Moving the legs and hip helps to strengthen the muscles of these parts, increase hip flexibility, and a sense of balance.                                                      |
| 7 | Arm and leg exercises    | Making movements with the arms and legs that lead the person to try to make the arm movements match the movements of the whole body helps to develop coordination of movement. |
| 8 | Deep breath              | Breathing deeply while moving your arms widely helps to bring the body back to a normal state.                                                                                 |

URL: <https://www.youtube.com/watch?v=1MGsuinREIk>



SPIRIT 2013 Checklist: Recommended items to address in a clinical trial protocol and related documents\*

| Section/item                      | Item No | Description                                                                                                                                                                                                                                                                              | Addressed on page number |
|-----------------------------------|---------|------------------------------------------------------------------------------------------------------------------------------------------------------------------------------------------------------------------------------------------------------------------------------------------|--------------------------|
| <b>Administrative information</b> |         |                                                                                                                                                                                                                                                                                          |                          |
| Title                             | 1       | Descriptive title identifying the study design, population, interventions, and, if applicable, trial acronym                                                                                                                                                                             | Page 1                   |
| Trial registration                | 2a      | Trial identifier and registry name. If not yet registered, name of intended registry                                                                                                                                                                                                     | Page 2                   |
|                                   | 2b      | All items from the World Health Organization Trial Registration Data Set                                                                                                                                                                                                                 | Not applicable           |
| Protocol version                  | 3       | Date and version identifier                                                                                                                                                                                                                                                              | Page 2                   |
| Funding                           | 4       | Sources and types of financial, material, and other support                                                                                                                                                                                                                              | Page 18                  |
| Roles and responsibilities        | 5a      | Names, affiliations, and roles of protocol contributors                                                                                                                                                                                                                                  | Pages 18                 |
|                                   | 5b      | Name and contact information for the trial sponsor                                                                                                                                                                                                                                       | Page 17–18               |
|                                   | 5c      | Role of study sponsor and funders, if any, in study design; collection, management, analysis, and interpretation of data; writing of the report; and the decision to submit the report for publication, including whether they will have ultimate authority over any of these activities | Page 17–18               |
|                                   | 5d      | Composition, roles, and responsibilities of the coordinating centre, steering committee, endpoint adjudication committee, data management team, and other individuals or groups overseeing the trial, if applicable (see Item 21a for data monitoring committee)                         | Not applicable           |

|    |                                                           |     |                                                                                                               |            |
|----|-----------------------------------------------------------|-----|---------------------------------------------------------------------------------------------------------------|------------|
| 1  | <b>Introduction</b>                                       |     |                                                                                                               |            |
| 2  |                                                           |     |                                                                                                               |            |
| 3  | Background and                                            | 6a  | Description of research question and justification for undertaking the trial, including summary of relevant   | Page 4     |
| 4  | rationale                                                 |     | studies (published and unpublished) examining benefits and harms for each intervention                        |            |
| 5  |                                                           |     |                                                                                                               |            |
| 6  |                                                           | 6b  | Explanation for choice of comparators                                                                         | Page 4     |
| 7  |                                                           |     |                                                                                                               |            |
| 8  | Objectives                                                | 7   | Specific objectives or hypotheses                                                                             | Pages 4–5  |
| 9  |                                                           |     |                                                                                                               |            |
| 10 | Trial design                                              | 8   | Description of trial design including type of trial (eg, parallel group, crossover, factorial, single group), |            |
| 11 |                                                           |     | allocation ratio, and framework (eg, superiority, equivalence, noninferiority, exploratory)                   | Page 5     |
| 12 |                                                           |     |                                                                                                               |            |
| 13 |                                                           |     |                                                                                                               |            |
| 14 | <b>Methods: Participants, interventions, and outcomes</b> |     |                                                                                                               |            |
| 15 |                                                           |     |                                                                                                               |            |
| 16 | Study setting                                             | 9   | Description of study settings (eg, community clinic, academic hospital) and list of countries where data will | Page 5     |
| 17 |                                                           |     | be collected. Reference to where list of study sites can be obtained                                          |            |
| 18 |                                                           |     |                                                                                                               |            |
| 19 | Eligibility criteria                                      | 10  | Inclusion and exclusion criteria for participants. If applicable, eligibility criteria for study centres and  | Pages 5    |
| 20 |                                                           |     | individuals who will perform the interventions (eg, surgeons, psychotherapists)                               |            |
| 21 |                                                           |     |                                                                                                               |            |
| 22 | Interventions                                             | 11a | Interventions for each group with sufficient detail to allow replication, including how and when they will be | Pages 6–8  |
| 23 |                                                           |     | administered                                                                                                  |            |
| 24 |                                                           |     |                                                                                                               |            |
| 25 |                                                           | 11b | Criteria for discontinuing or modifying allocated interventions for a given trial participant (eg, drug dose  | Page 7     |
| 26 |                                                           |     | change in response to harms, participant request, or improving/worsening disease)                             |            |
| 27 |                                                           |     |                                                                                                               |            |
| 28 |                                                           | 11c | Strategies to improve adherence to intervention protocols, and any procedures for monitoring adherence        | Pages 7–8  |
| 29 |                                                           |     | (eg, drug tablet return, laboratory tests)                                                                    |            |
| 30 |                                                           |     |                                                                                                               |            |
| 31 |                                                           | 11d | Relevant concomitant care and interventions that are permitted or prohibited during the trial                 | Page 6     |
| 32 |                                                           |     |                                                                                                               |            |
| 33 | Outcomes                                                  | 12  | Primary, secondary, and other outcomes, including the specific measurement variable (eg, systolic blood       | Pages 8–14 |
| 34 |                                                           |     | pressure), analysis metric (eg, change from baseline, final value, time to event), method of aggregation (eg, |            |
| 35 |                                                           |     | median, proportion), and time point for each outcome. Explanation of the clinical relevance of chosen         |            |
| 36 |                                                           |     | efficacy and harm outcomes is strongly recommended                                                            |            |
| 37 |                                                           |     |                                                                                                               |            |
| 38 | Participant timeline                                      | 13  | Time schedule of enrolment, interventions (including any run-ins and washouts), assessments, and visits for   | Figure 3   |
| 39 |                                                           |     | participants. A schematic diagram is highly recommended (see Figure)                                          |            |
| 40 |                                                           |     |                                                                                                               |            |
| 41 |                                                           |     |                                                                                                               |            |
| 42 |                                                           |     |                                                                                                               |            |
| 43 |                                                           |     |                                                                                                               |            |
| 44 |                                                           |     |                                                                                                               |            |
| 45 |                                                           |     |                                                                                                               |            |
| 46 |                                                           |     |                                                                                                               |            |

|    |                                                                     |     |                                                                                                                                                                                                                                                                                                                                                                                                              |                       |
|----|---------------------------------------------------------------------|-----|--------------------------------------------------------------------------------------------------------------------------------------------------------------------------------------------------------------------------------------------------------------------------------------------------------------------------------------------------------------------------------------------------------------|-----------------------|
| 1  | Sample size                                                         | 14  | Estimated number of participants needed to achieve study objectives and how it was determined, including clinical and statistical assumptions supporting any sample size calculations                                                                                                                                                                                                                        | Pages 15              |
| 2  |                                                                     |     |                                                                                                                                                                                                                                                                                                                                                                                                              |                       |
| 3  |                                                                     |     |                                                                                                                                                                                                                                                                                                                                                                                                              |                       |
| 4  | Recruitment                                                         | 15  | Strategies for achieving adequate participant enrolment to reach target sample size                                                                                                                                                                                                                                                                                                                          | Page 6                |
| 5  |                                                                     |     |                                                                                                                                                                                                                                                                                                                                                                                                              |                       |
| 6  |                                                                     |     |                                                                                                                                                                                                                                                                                                                                                                                                              |                       |
| 7  | <b>Methods: Assignment of interventions (for controlled trials)</b> |     |                                                                                                                                                                                                                                                                                                                                                                                                              |                       |
| 8  | Allocation:                                                         |     |                                                                                                                                                                                                                                                                                                                                                                                                              |                       |
| 9  |                                                                     |     |                                                                                                                                                                                                                                                                                                                                                                                                              |                       |
| 10 | Sequence                                                            | 16a | Method of generating the allocation sequence (eg, computer-generated random numbers), and list of any factors for stratification. To reduce predictability of a random sequence, details of any planned restriction (eg, blocking) should be provided in a separate document that is unavailable to those who enrol participants or assign interventions                                                     | Page 6                |
| 11 | generation                                                          |     |                                                                                                                                                                                                                                                                                                                                                                                                              |                       |
| 12 |                                                                     |     |                                                                                                                                                                                                                                                                                                                                                                                                              |                       |
| 13 |                                                                     |     |                                                                                                                                                                                                                                                                                                                                                                                                              |                       |
| 14 |                                                                     |     |                                                                                                                                                                                                                                                                                                                                                                                                              |                       |
| 15 |                                                                     |     |                                                                                                                                                                                                                                                                                                                                                                                                              |                       |
| 16 | Allocation                                                          | 16b | Mechanism of implementing the allocation sequence (eg, central telephone; sequentially numbered, opaque, sealed envelopes), describing any steps to conceal the sequence until interventions are assigned                                                                                                                                                                                                    | Page 6                |
| 17 | concealment                                                         |     |                                                                                                                                                                                                                                                                                                                                                                                                              |                       |
| 18 | mechanism                                                           |     |                                                                                                                                                                                                                                                                                                                                                                                                              |                       |
| 19 |                                                                     |     |                                                                                                                                                                                                                                                                                                                                                                                                              |                       |
| 20 | Implementation                                                      | 16c | Who will generate the allocation sequence, who will enrol participants, and who will assign participants to interventions                                                                                                                                                                                                                                                                                    | Page 6                |
| 21 |                                                                     |     |                                                                                                                                                                                                                                                                                                                                                                                                              |                       |
| 22 |                                                                     |     |                                                                                                                                                                                                                                                                                                                                                                                                              |                       |
| 23 |                                                                     |     |                                                                                                                                                                                                                                                                                                                                                                                                              |                       |
| 24 | Blinding (masking)                                                  | 17a | Who will be blinded after assignment to interventions (eg, trial participants, care providers, outcome assessors, data analysts), and how                                                                                                                                                                                                                                                                    | Page 6                |
| 25 |                                                                     |     |                                                                                                                                                                                                                                                                                                                                                                                                              |                       |
| 26 |                                                                     |     |                                                                                                                                                                                                                                                                                                                                                                                                              |                       |
| 27 |                                                                     | 17b | If blinded, circumstances under which unblinding is permissible, and procedure for revealing a participant's allocated intervention during the trial                                                                                                                                                                                                                                                         | Not applicable        |
| 28 |                                                                     |     |                                                                                                                                                                                                                                                                                                                                                                                                              |                       |
| 29 |                                                                     |     |                                                                                                                                                                                                                                                                                                                                                                                                              |                       |
| 30 |                                                                     |     |                                                                                                                                                                                                                                                                                                                                                                                                              |                       |
| 31 | <b>Methods: Data collection, management, and analysis</b>           |     |                                                                                                                                                                                                                                                                                                                                                                                                              |                       |
| 32 |                                                                     |     |                                                                                                                                                                                                                                                                                                                                                                                                              |                       |
| 33 | Data collection                                                     | 18a | Plans for assessment and collection of outcome, baseline, and other trial data, including any related processes to promote data quality (eg, duplicate measurements, training of assessors) and a description of study instruments (eg, questionnaires, laboratory tests) along with their reliability and validity, if known. Reference to where data collection forms can be found, if not in the protocol | Pages 8–14<br>Page 15 |
| 34 | methods                                                             |     |                                                                                                                                                                                                                                                                                                                                                                                                              |                       |
| 35 |                                                                     |     |                                                                                                                                                                                                                                                                                                                                                                                                              |                       |
| 36 |                                                                     |     |                                                                                                                                                                                                                                                                                                                                                                                                              |                       |
| 37 |                                                                     |     |                                                                                                                                                                                                                                                                                                                                                                                                              |                       |
| 38 |                                                                     |     |                                                                                                                                                                                                                                                                                                                                                                                                              |                       |
| 39 |                                                                     | 18b | Plans to promote participant retention and complete follow-up, including list of any outcome data to be collected for participants who discontinue or deviate from intervention protocols                                                                                                                                                                                                                    | Pages 7–8             |
| 40 |                                                                     |     |                                                                                                                                                                                                                                                                                                                                                                                                              |                       |
| 41 |                                                                     |     |                                                                                                                                                                                                                                                                                                                                                                                                              |                       |
| 42 |                                                                     |     |                                                                                                                                                                                                                                                                                                                                                                                                              |                       |
| 43 |                                                                     |     |                                                                                                                                                                                                                                                                                                                                                                                                              |                       |
| 44 |                                                                     |     |                                                                                                                                                                                                                                                                                                                                                                                                              |                       |
| 45 |                                                                     |     |                                                                                                                                                                                                                                                                                                                                                                                                              |                       |
| 46 |                                                                     |     |                                                                                                                                                                                                                                                                                                                                                                                                              |                       |

|    |                                 |     |                                                                                                                                                                                                                                                                                                                                       |                |
|----|---------------------------------|-----|---------------------------------------------------------------------------------------------------------------------------------------------------------------------------------------------------------------------------------------------------------------------------------------------------------------------------------------|----------------|
| 1  | Data management                 | 19  | Plans for data entry, coding, security, and storage, including any related processes to promote data quality (eg, double data entry; range checks for data values). Reference to where details of data management procedures can be found, if not in the protocol                                                                     | Page 15        |
| 2  |                                 |     |                                                                                                                                                                                                                                                                                                                                       |                |
| 3  |                                 |     |                                                                                                                                                                                                                                                                                                                                       |                |
| 4  |                                 |     |                                                                                                                                                                                                                                                                                                                                       |                |
| 5  | Statistical methods             | 20a | Statistical methods for analysing primary and secondary outcomes. Reference to where other details of the statistical analysis plan can be found, if not in the protocol                                                                                                                                                              | Page 15        |
| 6  |                                 |     |                                                                                                                                                                                                                                                                                                                                       |                |
| 7  |                                 |     |                                                                                                                                                                                                                                                                                                                                       |                |
| 8  |                                 | 20b | Methods for any additional analyses (eg, subgroup and adjusted analyses)                                                                                                                                                                                                                                                              | Pages 16       |
| 9  |                                 |     |                                                                                                                                                                                                                                                                                                                                       |                |
| 10 |                                 | 20c | Definition of analysis population relating to protocol non-adherence (eg, as randomised analysis), and any statistical methods to handle missing data (eg, multiple imputation)                                                                                                                                                       | Pages 16       |
| 11 |                                 |     |                                                                                                                                                                                                                                                                                                                                       |                |
| 12 |                                 |     |                                                                                                                                                                                                                                                                                                                                       |                |
| 13 |                                 |     |                                                                                                                                                                                                                                                                                                                                       |                |
| 14 | <b>Methods: Monitoring</b>      |     |                                                                                                                                                                                                                                                                                                                                       |                |
| 15 |                                 |     |                                                                                                                                                                                                                                                                                                                                       |                |
| 16 | Data monitoring                 | 21a | Composition of data monitoring committee (DMC); summary of its role and reporting structure; statement of whether it is independent from the sponsor and competing interests; and reference to where further details about its charter can be found, if not in the protocol. Alternatively, an explanation of why a DMC is not needed | Not applicable |
| 17 |                                 |     |                                                                                                                                                                                                                                                                                                                                       |                |
| 18 |                                 |     |                                                                                                                                                                                                                                                                                                                                       |                |
| 19 |                                 |     |                                                                                                                                                                                                                                                                                                                                       |                |
| 20 |                                 |     |                                                                                                                                                                                                                                                                                                                                       |                |
| 21 |                                 |     |                                                                                                                                                                                                                                                                                                                                       |                |
| 22 |                                 | 21b | Description of any interim analyses and stopping guidelines, including who will have access to these interim results and make the final decision to terminate the trial                                                                                                                                                               | Not applicable |
| 23 |                                 |     |                                                                                                                                                                                                                                                                                                                                       |                |
| 24 |                                 |     |                                                                                                                                                                                                                                                                                                                                       |                |
| 25 | Harms                           | 22  | Plans for collecting, assessing, reporting, and managing solicited and spontaneously reported adverse events and other unintended effects of trial interventions or trial conduct                                                                                                                                                     | Page 14        |
| 26 |                                 |     |                                                                                                                                                                                                                                                                                                                                       |                |
| 27 |                                 |     |                                                                                                                                                                                                                                                                                                                                       |                |
| 28 | Auditing                        | 23  | Frequency and procedures for auditing trial conduct, if any, and whether the process will be independent from investigators and the sponsor                                                                                                                                                                                           | Not applicable |
| 29 |                                 |     |                                                                                                                                                                                                                                                                                                                                       |                |
| 30 |                                 |     |                                                                                                                                                                                                                                                                                                                                       |                |
| 31 |                                 |     |                                                                                                                                                                                                                                                                                                                                       |                |
| 32 | <b>Ethics and dissemination</b> |     |                                                                                                                                                                                                                                                                                                                                       |                |
| 33 |                                 |     |                                                                                                                                                                                                                                                                                                                                       |                |
| 34 | Research ethics approval        | 24  | Plans for seeking research ethics committee/institutional review board (REC/IRB) approval                                                                                                                                                                                                                                             | Page 16        |
| 35 |                                 |     |                                                                                                                                                                                                                                                                                                                                       |                |
| 36 |                                 |     |                                                                                                                                                                                                                                                                                                                                       |                |
| 37 | Protocol amendments             | 25  | Plans for communicating important protocol modifications (eg, changes to eligibility criteria, outcomes, analyses) to relevant parties (eg, investigators, REC/IRBs, trial participants, trial registries, journals, regulators)                                                                                                      | Page 16        |
| 38 |                                 |     |                                                                                                                                                                                                                                                                                                                                       |                |
| 39 |                                 |     |                                                                                                                                                                                                                                                                                                                                       |                |
| 40 |                                 |     |                                                                                                                                                                                                                                                                                                                                       |                |
| 41 |                                 |     |                                                                                                                                                                                                                                                                                                                                       |                |
| 42 |                                 |     |                                                                                                                                                                                                                                                                                                                                       |                |
| 43 |                                 |     |                                                                                                                                                                                                                                                                                                                                       |                |
| 44 |                                 |     |                                                                                                                                                                                                                                                                                                                                       |                |
| 45 |                                 |     |                                                                                                                                                                                                                                                                                                                                       |                |
| 46 |                                 |     |                                                                                                                                                                                                                                                                                                                                       |                |



|    |                               |     |                                                                                                                                                                                                                                                                                     |                          |
|----|-------------------------------|-----|-------------------------------------------------------------------------------------------------------------------------------------------------------------------------------------------------------------------------------------------------------------------------------------|--------------------------|
| 1  | Consent or assent             | 26a | Who will obtain informed consent or assent from potential trial participants or authorised surrogates, and how (see Item 32)                                                                                                                                                        | Page 6                   |
| 2  |                               |     |                                                                                                                                                                                                                                                                                     |                          |
| 3  |                               |     |                                                                                                                                                                                                                                                                                     |                          |
| 4  |                               | 26b | Additional consent provisions for collection and use of participant data and biological specimens in ancillary studies, if applicable                                                                                                                                               | Not applicable           |
| 5  |                               |     |                                                                                                                                                                                                                                                                                     |                          |
| 6  |                               |     |                                                                                                                                                                                                                                                                                     |                          |
| 7  | Confidentiality               | 27  | How personal information about potential and enrolled participants will be collected, shared, and maintained in order to protect confidentiality before, during, and after the trial                                                                                                | Page 6                   |
| 8  |                               |     |                                                                                                                                                                                                                                                                                     |                          |
| 9  |                               |     |                                                                                                                                                                                                                                                                                     |                          |
| 10 | Declaration of interests      | 28  | Financial and other competing interests for principal investigators for the overall trial and each study site                                                                                                                                                                       | Page 18–19               |
| 11 |                               |     |                                                                                                                                                                                                                                                                                     |                          |
| 12 |                               |     |                                                                                                                                                                                                                                                                                     |                          |
| 13 | Access to data                | 29  | Statement of who will have access to the final trial dataset, and disclosure of contractual agreements that limit such access for investigators                                                                                                                                     | Page 19                  |
| 14 |                               |     |                                                                                                                                                                                                                                                                                     |                          |
| 15 |                               |     |                                                                                                                                                                                                                                                                                     |                          |
| 16 | Ancillary and post-trial care | 30  | Provisions, if any, for ancillary and post-trial care, and for compensation to those who suffer harm from trial participation                                                                                                                                                       | Page 6                   |
| 17 |                               |     |                                                                                                                                                                                                                                                                                     |                          |
| 18 |                               |     |                                                                                                                                                                                                                                                                                     |                          |
| 19 |                               |     |                                                                                                                                                                                                                                                                                     |                          |
| 20 | Dissemination policy          | 31a | Plans for investigators and sponsor to communicate trial results to participants, healthcare professionals, the public, and other relevant groups (eg, via publication, reporting in results databases, or other data sharing arrangements), including any publication restrictions | Page 16                  |
| 21 |                               |     |                                                                                                                                                                                                                                                                                     |                          |
| 22 |                               |     |                                                                                                                                                                                                                                                                                     |                          |
| 23 |                               |     |                                                                                                                                                                                                                                                                                     |                          |
| 24 |                               | 31b | Authorship eligibility guidelines and any intended use of professional writers                                                                                                                                                                                                      | Not applicable           |
| 25 |                               |     |                                                                                                                                                                                                                                                                                     |                          |
| 26 |                               | 31c | Plans, if any, for granting public access to the full protocol, participant-level dataset, and statistical code                                                                                                                                                                     | Not applicable           |
| 27 |                               |     |                                                                                                                                                                                                                                                                                     |                          |
| 28 |                               |     |                                                                                                                                                                                                                                                                                     |                          |
| 29 | <b>Appendices</b>             |     |                                                                                                                                                                                                                                                                                     |                          |
| 30 |                               |     |                                                                                                                                                                                                                                                                                     |                          |
| 31 | Informed consent materials    | 32  | Model consent form and other related documentation given to participants and authorised surrogates                                                                                                                                                                                  | Supplementary Material 2 |
| 32 |                               |     |                                                                                                                                                                                                                                                                                     |                          |
| 33 |                               |     |                                                                                                                                                                                                                                                                                     |                          |
| 34 | Biological specimens          | 33  | Plans for collection, laboratory evaluation, and storage of biological specimens for genetic or molecular analysis in the current trial and for future use in ancillary studies, if applicable                                                                                      | Not applicable           |
| 35 |                               |     |                                                                                                                                                                                                                                                                                     |                          |
| 36 |                               |     |                                                                                                                                                                                                                                                                                     |                          |

\*It is strongly recommended that this checklist be read in conjunction with the SPIRIT 2013 Explanation & Elaboration for important clarification on the items. Amendments to the protocol should be tracked and dated. The SPIRIT checklist is copyrighted by the SPIRIT Group under the Creative Commons [“Attribution-NonCommercial-NoDerivs 3.0 Unported”](https://creativecommons.org/licenses/by-nc-nd/3.0/) license.

## 同意書

東京都健康長寿医療センター  
センター長 殿

私は、「フレイル高齢者に対するラジオ体操の有効性を検討するランダム化並行群間比較試験」（研究代表者：大須賀洋祐）の概要についての詳細な説明を受け、自らの意思で研究に参加します。また、検査および調査結果の学術的な目的での利用に同意します。

説明を受け、理解した項目に☑してください。

- 1. 研究タイトル
- 2. 研究の背景
- 3. 研究の目的と意義
- 4. 研究の具体的な内容
- 5. 調査内容
- 6. 研究に参加することにより期待される利益と不利益
- 7. 予測される有害事象と健康被害への補償
- 8. 研究結果の取り扱い
- 9. 個人情報の保護および資料等の保管・廃棄の方法
- 10. 同意の自由と同意撤回
- 11. 費用の負担
- 12. 研究資金源および本研究に関わる利益相反
- 13. 研究計画の情報公開の方法
- 14. お問い合わせ先

### 参加者

署名日 令和4年 月 日

ご氏名：

### 説明者

署名日 令和4年 月 日

氏名：
