# Supplementary material for: Effects of a home-based Radio-Taiso exercise programme on health-related quality of life in older adults with frailty: protocol for an assessor-blind randomised controlled trial
Source: PubMed Central journal article supplement — BMJ Open. 2022 Sep 22;12(9):e063201. doi: 10.1136/bmjopen-2022-063201 (PMC9511584; doi:10.1136/bmjopen-2022-063201), 2022-09-22
Supplement: bmjopen-2022-063201supp002.pdf [file bmjopen-2022-063201supp002.pdf]

2022 年 5 月 9 日 | 第 14.0 版

同意書

東京都健康長寿医療センター  
センター長 殿

私は、「フレイル高齢者に対するラジオ体操の有効性を検討するランダム化並行群間比較試験」（研究代表者：大須賀洋祐）の概要についての詳細な説明を受け、自らの意思で研究に参加します。また、検査および調査結果の学術的な目的での利用に同意します。

説明を受け、理解した項目に☑してください。

- ☐ 1. 研究タイトル
- ☐ 2. 研究の背景
- ☐ 3. 研究の目的と意義
- ☐ 4. 研究の具体的な内容
- ☐ 5. 調査内容
- ☐ 6. 研究に参加することにより期待される利益と不利益
- ☐ 7. 予測される有害事象と健康被害への補償
- ☐ 8. 研究結果の取り扱い
- ☐ 9. 個人情報の保護および資料等の保管・廃棄の方法
- ☐ 10. 同意の自由と同意撤回
- ☐ 11. 費用の負担
- ☐ 12. 研究資金源および本研究に関わる利益相反
- ☐ 13. 研究計画の情報公開の方法
- ☐ 14. お問い合わせ先

参加者

署名日 令和4年 月 日

ご氏名：  
\_\_\_\_\_

説明者

署名日 令和4年 月 日

氏名：  
\_\_\_\_\_
